# Supplementary material for: Cancer treatment decision-making among parents of paediatric oncology patients in Guatemala: a mixed-methods study
Source: PubMed Central journal article supplement — BMJ Open. 2022 Aug 11;12(8):e057350. doi: 10.1136/bmjopen-2021-057350 (PMC9379539; doi:10.1136/bmjopen-2021-057350), 2022-08-11
Supplement: bmjopen-2021-057350.draft_revisions.pdf [file bmjopen-2021-057350.draft_revisions.pdf]

# BMJ Open

BMJ Open is committed to open peer review. As part of this commitment we make the peer review history of every article we publish publicly available.

When an article is published we post the peer reviewers' comments and the authors' responses online. We also post the versions of the paper that were used during peer review. These are the versions that the peer review comments apply to.

The versions of the paper that follow are the versions that were submitted during the peer review process. They are not the versions of record or the final published versions. They should not be cited or distributed as the published version of this manuscript.

BMJ Open is an open access journal and the full, final, typeset and author-corrected version of record of the manuscript is available on our site with no access controls, subscription charges or pay-per-view fees (<http://bmjopen.bmj.com>).

If you have any questions on BMJ Open's open peer review process please email [info.bmjopen@bmj.com](mailto:info.bmjopen@bmj.com)

# BMJ Open

## Cancer Treatment Decision-Making among Parents of Pediatric Oncology Patients in Guatemala

|                               |                                                                                                                                                                                                                                                                                                                                                                                                                                                                                                                                                                                                                                                                                                                                                                                                                                                                 |
|-------------------------------|-----------------------------------------------------------------------------------------------------------------------------------------------------------------------------------------------------------------------------------------------------------------------------------------------------------------------------------------------------------------------------------------------------------------------------------------------------------------------------------------------------------------------------------------------------------------------------------------------------------------------------------------------------------------------------------------------------------------------------------------------------------------------------------------------------------------------------------------------------------------|
| Journal:                      | <i>BMJ Open</i>                                                                                                                                                                                                                                                                                                                                                                                                                                                                                                                                                                                                                                                                                                                                                                                                                                                 |
| Manuscript ID                 | bmjopen-2021-057350                                                                                                                                                                                                                                                                                                                                                                                                                                                                                                                                                                                                                                                                                                                                                                                                                                             |
| Article Type:                 | Original research                                                                                                                                                                                                                                                                                                                                                                                                                                                                                                                                                                                                                                                                                                                                                                                                                                               |
| Date Submitted by the Author: | 14-Sep-2021                                                                                                                                                                                                                                                                                                                                                                                                                                                                                                                                                                                                                                                                                                                                                                                                                                                     |
| Complete List of Authors:     | Graetz, Dylan; St Jude Children's Research Hospital<br>Rivas, Silvia; Unidad Nacional de Oncologia Pediatrica<br>Wang, Huiqi; Saint Jude Children's Research Hospital, Global Pediatric Medicine<br>Vedaraju, Yuvanesh; Saint Jude Children's Research Hospital, Global Pediatric Medicine<br>Ferrara, Gia; St Jude Children's Research Hospital<br>Fuentes, Lucia; Unidad Nacional de Oncologia Pediatrica, Psychology<br>Cáceres- Serrano, Ana; Unidad Nacional de Oncologia Pediatrica<br>Antillon-Klussmann, Federico; Unidad Nacional de Oncologia Pediatrica; Universidad Francisco Marroquin Facultad de Medicina<br>Devidas, Meenakshi; St Jude Children's Research Hospital<br>Metzger, Monika; Saint Jude Children's Research Hospital,<br>Rodriguez-Galindo, C; St Jude Children's Research Hospital<br>Mack, Jennifer; Dana-Farber Cancer Institute |
| Keywords:                     | PAEDIATRICS, Paediatric oncology < ONCOLOGY, QUALITATIVE RESEARCH                                                                                                                                                                                                                                                                                                                                                                                                                                                                                                                                                                                                                                                                                                                                                                                               |
|                               |                                                                                                                                                                                                                                                                                                                                                                                                                                                                                                                                                                                                                                                                                                                                                                                                                                                                 |

SCHOLARONE™  
Manuscripts

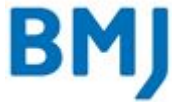

I, the Submitting Author has the right to grant and does grant on behalf of all authors of the Work (as defined in the below author licence), an exclusive licence and/or a non-exclusive licence for contributions from authors who are: i) UK Crown employees; ii) where BMJ has agreed a CC-BY licence shall apply, and/or iii) in accordance with the terms applicable for US Federal Government officers or employees acting as part of their official duties; on a worldwide, perpetual, irrevocable, royalty-free basis to BMJ Publishing Group Ltd ("BMJ") its licensees and where the relevant Journal is co-owned by BMJ to the co-owners of the Journal, to publish the Work in this journal and any other BMJ products and to exploit all rights, as set out in our [licence](#).

The Submitting Author accepts and understands that any supply made under these terms is made by BMJ to the Submitting Author unless you are acting as an employee on behalf of your employer or a postgraduate student of an affiliated institution which is paying any applicable article publishing charge ("APC") for Open Access articles. Where the Submitting Author wishes to make the Work available on an Open Access basis (and intends to pay the relevant APC), the terms of reuse of such Open Access shall be governed by a Creative Commons licence – details of these licences and which [Creative Commons](#) licence will apply to this Work are set out in our licence referred to above.

Other than as permitted in any relevant BMJ Author's Self Archiving Policies, I confirm this Work has not been accepted for publication elsewhere, is not being considered for publication elsewhere and does not duplicate material already published. I confirm all authors consent to publication of this Work and authorise the granting of this licence.

1  
2  
3 **Title:** Cancer Treatment Decision-Making among Parents of Pediatric Oncology Patients in  
4  
5 Guatemala

6  
7  
8 **Running Head:** Decision-Making in Guatemala

9  
10 **Authors:** Dylan E. Graetz MD MPH<sup>a</sup>, Silvia Elena Rivas MD<sup>b</sup>, Huiqi Wang MS<sup>a</sup>, Yuvanesh  
11  
12 Vedaraju MS<sup>a</sup>, Gia Ferrara MSGH<sup>a</sup>, Ana Lucia Fuentes<sup>b</sup>, Annie Caceres-Serrano PhD<sup>b</sup>, Federico  
13  
14 Antillon-Klussmann MD PhD<sup>b,c</sup>, Meenakshi Devidas PhD, MBA<sup>a</sup>, Monika L. Metzger MD MS<sup>a</sup>,  
15  
16 Carlos Rodriguez-Galindo MD<sup>a</sup>, Jennifer W. Mack MD MPH<sup>d</sup>

17  
18  
19 **Affiliations:**

20  
21 <sup>a</sup> St. Jude Children's Research Hospital, Memphis, Tennessee, USA

22  
23 <sup>b</sup> Unidad Nacional de Oncología Pediátrica, Guatemala City, Guatemala

24  
25 <sup>c</sup> Francisco Marroquin University School of Medicine, Guatemala City, Guatemala

26  
27 <sup>d</sup> Dana Farber Cancer Institute/Boston Children's Hospital, Boston, Massachusetts, USA

28  
29  
30 **Corresponding Author:** Dylan Graetz, St. Jude Children's Research Hospital, 262 Danny  
31  
32 Thomas Place, Mailstop 721, Memphis TN 38105-3678; phone: 901 595-0763; email:  
33  
34 [dylan.graetz@stjude.org](mailto:dylan.graetz@stjude.org)

35  
36  
37 **Funding source:** This work was funded by American Lebanese Syrian Associated Charities of  
38  
39 St. Jude Children's Research Hospital and a Conquer Cancer Young Investigator Award (award  
40  
41 number 17290). Any opinions, findings, and conclusions expressed in this material are those of  
42  
43 the authors and do not necessarily reflect those of the American Society of Clinical Oncology or  
44  
45 Conquer Cancer.

46  
47  
48 **Conflict of interest statement:** The authors have no conflicts of interest relevant to this article  
49  
50 to disclose.  
51  
52  
53  
54  
55  
56  
57  
58  
59  
60

1  
2  
3 **Contributorship statement:** Dr. Graetz conceptualized and designed the study and data  
4 collection tools, supervised pilot testing and data collection, analyzed qualitative data, drafted the  
5 initial manuscript, and reviewed and revised the manuscript.  
6  
7

8  
9  
10 Drs. Rivas and Antillon-Klussman contributed to study design, facilitated study approval and  
11 supervised data collection at Unidad Nacional Oncología Pediátrica, and reviewed and revised  
12 the manuscript.  
13  
14

15  
16 Ms. Wang, Mr. Vedaraju, and Dr. Devidas conducted statistical data analysis and reviewed and  
17 revised the manuscript.  
18  
19

20  
21 Ms. Ferrara analyzed the qualitative data and reviewed and revised the manuscript.  
22

23  
24 Ms. Fuentes and Ms. Caceres-Serrano contributed to study design, conducted pilot testing,  
25 collected data, and reviewed and revised the manuscript.  
26  
27

28  
29 Drs. Metzger and Rodriguez-Galindo contributed to study design and reviewed and revised the  
30 manuscript.  
31  
32

33  
34 Dr. Mack conceptualized and designed the study and data collection tools, and critically  
35 reviewed the manuscript for important intellectual content.  
36  
37

38  
39 All authors approved the final manuscript as submitted and agree to be accountable for all  
40 aspects of the work.  
41

42  
43 **Abbreviations:** LMICs: low- and middle-income countries; UNOP: Unidad Nacional de  
44 Oncología Pediátrica; St. Jude: St. Jude Children's Research Hospital  
45

46  
47 **Acknowledgements:** The authors would like to thank psychologists Pilar Alvarado, Inés  
48 Ordoñez, Paulina Salazar and Debby Velleman for their efforts assisting in qualitative data  
49 collection, as well as child psychologists Ana Lucia Espinoza Asturias and Gabriela Maria  
50 Garcia Palencia for their efforts assisting in survey administration, and the entire *Medicina*  
51  
52  
53  
54  
55  
56  
57  
58  
59  
60

1  
2  
3 *Integral* team at Unidad Nacional de Oncología Pediátrica for supporting this work. We would  
4  
5 also like to thank the parent participants who made this study possible.  
6

7  
8 **Key words:** Pediatric cancer; Guatemala; Decision-Making; Communication  
9

10 **Total number of text pages:** 24; **Tables:** 4; **Figures:** 0; **Supporting files:** 1  
11  
12  
13  
14  
15  
16  
17  
18  
19  
20  
21  
22  
23  
24  
25  
26  
27  
28  
29  
30  
31  
32  
33  
34  
35  
36  
37  
38  
39  
40  
41  
42  
43  
44  
45  
46  
47  
48  
49  
50  
51  
52  
53  
54  
55  
56  
57  
58  
59  
60

For peer review only

## Abstract

**Objectives:** To examine treatment decision-making priorities and experiences among parents of children with cancer in Guatemala.

**Setting:** This study was conducted at Guatemala's national pediatric cancer center in Guatemala City.

**Participants:** Spanish speaking parents of pediatric patients ( $\leq 18$  years of age) diagnosed with any form of cancer within the 8 weeks prior to study enrollment. The quantitative portion of this study included 100 parent participants; the qualitative component included 20 parents. Most participants were Catholic or Evangelical Spanish-speaking mothers.

**Outcomes:** Priorities and experiences of cancer treatment decision-making including decision-making role and experienced regret.

**Results:** A range of pediatric ages and cancer diagnoses were included. Most Guatemalan parents surveyed (70%) made decisions about their child's cancer together and almost all (94%) without input from their community. Surveyed parents predominately preferred shared decision-making with their child's oncologist (76%), however 69% agreed it was best not to be provided with many options. Two-thirds of surveyed parents (65%) held their preferred role in decision-making, with fathers more likely to hold their preferred role than mothers ( $p=0.02$ ). A small number of parents (11%) experienced heightened decisional regret, which did not correlate with sociodemographic characteristics or preferred decision-making role. Qualitative results supported quantitative findings, demonstrating a decision-making process that emphasized trust over autonomy.

**Conclusions:** Guatemalan parents preferred to make decisions with their medical team and appreciated providers who were honest and inclusive, but directive about decisions. This study

1  
2  
3 reinforces the importance of the provider-parent relationship and en`courages clinicians in all  
4  
5 settings to ask about and honor each parent's desired role in decision-making.  
6  
7  
8  
9

## 10 **Article Summary:**

### 11 Strengths and limitations of this study:

- 12  
13  
14  
15 • This study investigated communication and decision-making, key components of patient-  
16  
17 centered care, in a middle-income country, a previously understudied area of research in  
18  
19 this population.
- 20  
21  
22 • The convergent mixed-methods study design enabled broad assessment of decision-  
23  
24 making priorities as well as deep exploration of decision-making processes among  
25  
26 Guatemalan parents of children with cancer.
- 27  
28  
29 • Use of survey items previously validated in high-income countries allowed for  
30  
31 comparison to published literature from these settings.
- 32  
33  
34 • The focus on the diagnostic period limited the ability to consider how decision-making  
35  
36 may change over the cancer continuum.
- 37  
38  
39 • Study was conducted at single cancer center in one middle-income country, and thus  
40  
41 results may not apply to other low- and middle-income countries  
42  
43  
44

45 **Data sharing statement:** Extra data is available upon reasonable request by emailing the  
46  
47 corresponding author.  
48  
49  
50  
51  
52  
53  
54  
55  
56  
57  
58  
59  
60



## Key Questions:

### What is already known?

- Parents of children with cancer are faced with difficult decisions regarding care and treatment.
- In high-income Western contexts, shared decision-making is associated with improved outcomes, but little is known about decision-making in low- and middle-income countries, where 90% of children with cancer live.

### What are the new findings?

- This mixed-methods study included 120 Guatemalan parents of children with cancer and demonstrated that most parents prefer to make cancer decisions with their child's oncologist (76%), and most (65%) held their preferred role in decision-making, while few (11%) experienced decisional regret.
- Qualitative data demonstrates how culture may influence models for shared decision-making.

### What do the new findings imply?

- Guatemalan parents have many of the same priorities for cancer decision-making as parents of children in the United States and face similar challenges.
- These results reinforce the importance of the provider-parent relationship in all settings and encouraging cultural sensitivity.

## Introduction

From the time of diagnosis, parents of children with cancer are faced with difficult decisions regarding care and treatment. Shared decision-making is associated with improved patient-reported outcomes for adult cancer patients,<sup>1</sup> and research from high-income Western countries has emphasized a similar model for parents of children with cancer.<sup>2,3</sup> Effective shared decision-making depends on high-quality communication<sup>4</sup> through which pediatric oncology providers explore parents' goals of care as they present treatment options and determine a mutually acceptable action plan.

Parental values affect the extent to which they desire to be involved in decision-making, and both individual as well as community belief systems are shaped by culture. Cultural differences between patients and healthcare providers during decision-making have been demonstrated to result in erroneous assumptions and interpersonal conflict.<sup>4</sup> For parents of children with cancer, having their preferred role in decision making may increase trust in healthcare providers<sup>5</sup> and decrease regret.<sup>3,6</sup> Nevertheless, culture is rarely accounted for in research surrounding patient-provider communication and decision-making,<sup>7</sup> and very few studies have explored decision-making among pediatric cancer patients in low- and middle-income countries,<sup>8</sup> where >90% of children with cancer live.<sup>9</sup> The purpose of this mixed-methods study was to examine cancer treatment decision-making among parents of children with cancer in Guatemala at the time of diagnosis. We sought to assess the decision-making preferences and experiences of parents of children with cancer through a cross-sectional survey and used audio-recorded diagnostic conversations and semi-structured interviews to explore decision-making processes and

1  
2  
3 influences in greater depth, including who was involved in the process, how cancer treatment  
4 decisions were made, and parental reflections on early decisions.  
5  
6  
7  
8  
9

## 10 **Methods**

11  
12  
13  
14 This study utilized a convergent mixed-methods design. Quantitative data was collected from a  
15 verbally administered cross-sectional survey. Qualitative data included diagnostic conversations  
16 between healthcare providers and parents of newly diagnosed children with cancer, and  
17 subsequent semi-structured interviews.  
18  
19  
20  
21  
22  
23  
24  
25

### 26 Participants and setting

27  
28  
29  
30 This study was conducted at Guatemala's national pediatric cancer center: Unidad Nacional de  
31 Oncología Pediátrica (UNOP). UNOP is located in Guatemala City, Guatemala. Approximately  
32 500 new cases of childhood cancer are diagnosed at UNOP annually, and the survival rate at  
33 UNOP is about 67%.<sup>10</sup>  
34  
35  
36  
37  
38  
39  
40  
41

42 Eligibility criteria for the quantitative sample and qualitative sample were the same and included  
43 Spanish speaking parents of pediatric patients ( $\leq 18$  years of age) diagnosed with any form of  
44 cancer within the past 8 weeks. Parents participated in either the quantitative or qualitative  
45 portion of the study, but not both. Of 104 parents approached for the quantitative sample, 100  
46 (96%) agreed to participate. Participants in the qualitative sample were recruited sequentially,  
47 with additional purposive sampling<sup>11</sup> to ensure representation of a range of pediatric ages and  
48  
49  
50  
51  
52  
53  
54  
55  
56  
57  
58  
59  
60

1  
2  
3 diagnoses as well as families with diverse socioeconomic and cultural backgrounds. Overall, 32  
4  
5 parents were approached for participation in the qualitative study and 20 parents agreed to  
6  
7 participate. Thematic saturation<sup>12</sup> was reached after enrollment of 20 parents and no further  
8  
9 participants were approached.  
10  
11  
12  
13

#### 14 Ethics approval

15  
16  
17  
18  
19 Written informed consent was obtained in Spanish by a native Spanish speaker for all  
20  
21 participants. This study was performed in compliance with international regulations for  
22  
23 protection of human subjects and approved by institutional review boards (IRBs) and ethics  
24  
25 committees at St. Jude and UNOP (IRB Number: 19-0162; Reference Number: 010262).  
26  
27  
28  
29

#### 30 Study design and data collection

31  
32  
33  
34  
35 For the quantitative component of the study, a cross-sectional survey was developed using items  
36  
37 previously used in high-income countries<sup>5,6,13</sup> as well as novel questions specific to the study  
38  
39 population. The survey was developed in English, translated into Spanish, pilot tested with 23  
40  
41 parents to establish face and content validity through iterative revision, and back translated into  
42  
43 English to ensure the original intent of questions was preserved.  
44  
45  
46  
47  
48

49 *Sociodemographic information* was obtained through survey questions on participant's gender,  
50  
51 relationship to the child, languages spoken, religion, ethnicity, household income, and marital  
52  
53  
54  
55  
56  
57  
58  
59

1  
2  
3 status. Demographic information on patients including gender, age, and diagnosis was obtained  
4  
5 from medical record review.  
6  
7  
8  
9

10 *Decision making preferences and experiences* were assessed through the survey, first by asking  
11  
12 parents “Who do you consider to be the person who makes most decisions in your house in  
13  
14 general?”, and “about your child’s cancer treatment?”. Response options included “Another  
15  
16 parent or family member makes most of the decisions”, “I am the parent most involved in  
17  
18 making decisions” and, “I share decision-making equally with my child’s other parent or family  
19  
20 member”. Parents were asked: “Which statement best describes the role your community played  
21  
22 in helping you make decisions?”. Response options included: “I/We made decisions about  
23  
24 treatment without input from my community”, “...with help from members or leaders in my  
25  
26 community”, and “My community, or a leader in my community, made the decision and told me  
27  
28 what was best”. A similar question asked about involvement of religious or spiritual leaders in  
29  
30 decision-making.  
31  
32  
33  
34  
35  
36  
37

38 Regarding decision-making with the child’s oncologist, parents were asked to describe “the role  
39  
40 you would prefer to play when decisions about treatment for your child’s cancer are made”.

41  
42 Response options included: “I prefer that my child’s oncologist and I make the decisions  
43  
44 together”, “I prefer that my child’s oncologist make most of the decisions”, or “I prefer to make  
45  
46 the decisions about treatment”. Parents were then asked about “the role you actually played when  
47  
48 making decisions about treatment for your child’s cancer”, with similar response options framed  
49  
50 in the past tense. To further assess preferences for shared decision-making, parents were asked  
51  
52  
53  
54 “How much do you agree with the following statement: I’d rather have doctors and nurses make  
55  
56  
57  
58  
59  
60

1  
2  
3 the decisions about what's best than for them to give me a whole lot of choices". Response  
4 options included: "strongly agree", "slightly agree", and "disagree". Parents were also asked "At  
5 the time of diagnosis, which of the following statements best describes how your oncologist  
6 explained your child's treatment plan", with response options including "He/she gave me  
7 different options and I chose what was best", "He/she gave me different options and he/she told  
8 me what was best", and "He/she gave me only one option".  
9

10  
11  
12  
13  
14  
15  
16  
17  
18  
19 Decisional regret was assessed using a modified version of the Decisional Regret Scale,<sup>14,15</sup>  
20 which asked participants to state whether they "strongly agreed", "slightly agreed", or  
21 "disagreed" with each of the following statements: "I have made the right decisions", "I regret  
22 the choices that were made", "I would make the same choices if I had to do it all over again",  
23 "The decisions were wise", and "The choices did my child a lot of harm".  
24  
25  
26  
27  
28  
29  
30

31  
32  
33 The qualitative component of the study involved three audio-recorded sessions for each  
34 participating family (60 sessions total). At UNOP, the standard diagnostic procedure includes an  
35 intake conversation with a psychologist, followed by an initial diagnostic conversation with the  
36 oncologist about diagnosis and treatment plans for which the psychologist is also present. These  
37 two conversations were audio recorded as they naturally occurred, and one parent from each  
38 participating family was subsequently interviewed. Semi-structured interviews explored parents'  
39 communication perspectives and experiences, including the process for decision-making at  
40 UNOP and parental reflections. All audio recordings were professionally transcribed and  
41 translated into English with review by bilingual members of the research team to ensure adequate  
42 capture of original content.  
43  
44  
45  
46  
47  
48  
49  
50  
51  
52  
53  
54  
55  
56  
57  
58  
59  
60

1  
2  
3  
4  
5 Complete survey and interview script are included as **supplementary materials**.  
6  
7  
8  
9

### 10 Data analysis

11  
12  
13

14 Quantitative data including sociodemographic information and items pertaining to decision-  
15 making were analyzed descriptively. Proportions between groups were compared using Chi-  
16 square or Fisher's exact test as appropriate. Parent responses regarding their preferred decision-  
17 making role was compared to the actual role they played. Parents whose preferences matched  
18 their experiences were considered to have held their preferred role and were compared to parents  
19 whose experiences did not match their preferences. Univariate logistic regression was used to  
20 assess the impact of sociodemographic characteristics on "preferred" versus "non-preferred" role  
21 in decision-making. A decisional regret score was calculated based on previously reported  
22 methods.<sup>15</sup> Because our final scale used 3 rather than 5 response options based on findings  
23 during pilot testing ("disagree", "slightly agree", "strongly agree"), points were assigned with a  
24 scale of 1, 3, and 5 with reverse scoring where appropriate, in which a score of 1 indicated the  
25 least regret and 5 indicated the most regret. Scores were decreased by 1 point and multiplied by  
26 25 for a score range of 0 to 100. Consistent with existing literature,<sup>15</sup> scores of 0 were  
27 categorized as no regret, 1-25 as mild regret, and >25 as heightened regret. Univariate logistic  
28 regression was performed with sociodemographic variables as well as "preferred" versus "non-  
29 preferred" role in decision-making.  
30  
31  
32  
33  
34  
35  
36  
37  
38  
39  
40  
41  
42  
43  
44  
45  
46  
47  
48  
49  
50  
51  
52  
53  
54  
55  
56  
57  
58  
59  
60

1  
2  
3 Analysis of qualitative data was conducted by two independent coders who conducted thematic  
4 content analysis<sup>16</sup> on all transcripts utilizing a combination of *a priori*<sup>17,18</sup> and novel codes.  
5  
6 Interrater reliability ranged from 0.72-0.88. Novel codes were identified based on recurrent  
7 themes by two authors who iteratively read transcripts. Conceptual definitions were refined  
8 through memo writing and initial coding of 12 transcripts. The final codebook is included as  
9  
10 **supplementary material**. Codes related to decision-making included those identifying the  
11 decision-maker, the type of decision, and the reasons behind decision-making. Codes related to  
12 shared decision making at the cancer center included those expressed by providers and  
13 reflections from parents. MAXQDA (VERBI, Berlin, Germany) was utilized for data  
14 management. The Consolidated Criteria for Reporting Qualitative Studies guidelines were  
15 followed.<sup>19</sup>  
16  
17  
18  
19  
20  
21  
22  
23  
24  
25  
26  
27  
28  
29  
30

### 31 Patient and public involvement

32  
33  
34  
35 Neither patients, parents, nor the public were designed in the design of this research. Parents  
36 were involved in piloting the survey and we plan to involve parents further as we disseminate  
37 these results and consider interventional work.  
38  
39  
40  
41  
42  
43

## 44 **Results**

### 45 Participant Characteristics

46  
47  
48  
49  
50  
51  
52  
53  
54  
55  
56  
57  
58  
59  
60



1  
2  
3 Demographic characteristics of participants from each sample and their children are included in  
4  
5 Table 1. Most included participants in both samples were Spanish-speaking mothers who  
6  
7 identified as either Catholic or Evangelical. A range of pediatric ages and cancer diagnoses were  
8  
9 included.  
10

### 11 12 13 14 15 Parental decision-making

16  
17  
18  
19 Most Guatemalan parents surveyed (80%) made household decisions with the child's other  
20  
21 parent, and 70% made decisions about their child's cancer care this way. In interviews, parents  
22  
23 described sharing decision-making with their partners. One father said, *"I talk to my wife and we*  
24  
25 *agree on a middle point...the decisions are made by my wife and me"*; a mother described how  
26  
27 she made decisions *"with my husband, because we are a couple."* While many interviewed  
28  
29 parents listened to advice from extended family or community members, they emphasized the  
30  
31 parental unit as the ultimate decision maker: *"We have to talk, ask people with experience, and*  
32  
33 *then we decide"*. Amongst surveyed parents, almost all (94%) reported making decisions without  
34  
35 input from their community, and most (76%) made decisions without input from religious or  
36  
37 spiritual leaders.  
38  
39  
40  
41  
42  
43  
44

45 In describing how they ultimately made decisions around cancer care and treatment during  
46  
47 interviews, parents prioritized the health and survival of their children. As one parent said, *"We*  
48  
49 *think of the kid first. We want to give him the best. We want to get better."* Other parents  
50  
51 described sacrifices they were making, or were willing to make, in order to get their child  
52  
53  
54  
55  
56  
57  
58  
59  
60

1  
2  
3 appropriate care: *“If I must give her my heart, my kidney, I’d give it to her so she won’t die. I*  
4 *already lived; she’s starting to live. I tell her if I must die for you to be cured, I’ll do it.”*  
5  
6  
7  
8  
9

### 10 Decision-making with the oncologist

11  
12  
13

14  
15 When asked about their preferred role in decision-making with respect to the oncologist, most  
16 Guatemalan parents (76% of those surveyed) wanted to share decision-making with their child’s  
17 oncologist. Of those that did not, 20% preferred that the oncologist made most of the decisions,  
18 while 4% preferred to make treatment decisions themselves. However, a majority of parents  
19 either slightly (21%) or strongly (47%) agreed that they would rather have their medical team  
20 make decisions about what was best than provide a lot of choices; 31% disagreed. When asked  
21 about their experiences during the decision-making process, only a few surveyed parents (4%)  
22 said the oncologist provided them with options and they chose; the rest reported that they were  
23 either given options and said the oncologist told them which was best (48%), or were not  
24 provided options (48%).  
25  
26  
27  
28  
29  
30  
31  
32  
33  
34  
35  
36  
37  
38  
39

40 Qualitative data reflected a model of decision-making that emphasized honesty and trust in the  
41 medical team. Psychologists set the tone during initial conversations, highlighting a team  
42 approach to care and including parents as part of this team. One psychologist said: *“I know it’s*  
43 *hard to trust in strangers, but you can ask all mothers here at the hospital, we are a team along*  
44 *with the parents...we don’t hide information.”* Another emphasized honesty saying, *“we will*  
45 *always tell you the truth, even if the truth is hard.”* These messages were reinforced almost  
46  
47  
48  
49  
50  
51  
52  
53  
54  
55  
56  
57  
58  
59  
60

1  
2  
3 verbatim in diagnostic conversations with the oncologists: *“We promise we will always tell you*  
4 *the truth. Even if the information is bad, we will tell you, we will never hide information.”*  
5  
6  
7  
8  
9

10 However, when psychologists and oncologists talked about treatment, they emphasized the  
11 importance of starting immediately, using words like *“must”* and phrases such as *“have to”*,  
12 without providing parents with multiple options. These directives referred to treatment  
13 modalities, such as surgery or chemotherapy, necessity of hospitalization, and importance of  
14 follow-up appointments. Table 2 includes additional quotations that demonstrate the tone around  
15 decision-making set by psychologists and oncologists at UNOP.  
16  
17  
18  
19  
20  
21  
22  
23  
24  
25

26 Guatemalan parents accepted this model, expressing trust in their medical teams and deference to  
27 their providers. One parent directly told the oncologist, *“Whatever you say, you decide”*.  
28  
29

30 Another parent described in an interview: *“We didn’t know if it was the best, but that’s like when*  
31 *you wear an outfit – I just wear it – it doesn’t matter if it’s pretty or not”*. Parents also referred to  
32 the expertise of their medical team, one saying, *“the best specialists are here, this is why I’m*  
33 *here”* and another, *“I didn’t ask much; the experts know the solution.”*  
34  
35  
36  
37  
38  
39  
40  
41

## 42 Reflections on decision-making

43  
44  
45  
46

47 Two-thirds of surveyed parents (65%) held their preferred role in decision-making around their  
48 child’s cancer care, while 23% had a more active role than desired and 11% had a less active role  
49 than desired. Fathers were more likely to hold their preferred role in decision-making than  
50 mothers (OR 4.32 [95% CI 1.17-15.89], p=0.02) (Table 3).  
51  
52  
53  
54  
55  
56  
57  
58  
59  
60

1  
2  
3  
4  
5 Most parents (64%) were categorized as having no decisional regret, while 25% had mild regret,  
6  
7 and 11% had heightened regret. Heightened decisional regret did not significantly correlate with  
8  
9 any sociodemographic variables, or with parents having played their preferred role in decision  
10  
11 making (OR 1.34 [95% CI 0.32-5.56, p=0.68) (Table 4). Parents in the qualitative sample  
12  
13 predominantly expressed gratitude (“*we are grateful for this treatment*”), peace (“*I’m a little bit*  
14  
15 *more calmed*”; “*here we feel more relaxed*”), and relief (“*They told me this was a good*  
16  
17 *hospital; I felt relief*”) as they reflected on decisions they had made.  
18  
19  
20  
21  
22  
23

## 24 Discussion

25  
26  
27  
28 The majority of Guatemalan parents included in this study valued shared decision-making, both  
29  
30 with the child’s other parent and with their child’s oncologist. Providers at UNOP emphasized a  
31  
32 decision-making model in which trust and honesty were prioritized over autonomy, and parents  
33  
34 deferred to their providers and were predominantly satisfied with the care they received.  
35  
36  
37 Ultimately, most parents felt they had made the right decisions, however, 11% experienced  
38  
39 heightened decisional regret.  
40  
41  
42  
43

44 There are many approaches to decision-making in pediatric cancer care.<sup>20</sup> In high-income  
45  
46 Western contexts, shared decision-making has been prioritized.<sup>21</sup> While different definitions of  
47  
48 shared decision-making exist, it is often presented in contrast to paternalism and generally  
49  
50 emphasizes autonomy,<sup>22</sup> multiple options,<sup>23</sup> and two-way information-exchange.<sup>24</sup>  
51  
52  
53  
54 Approximately three out of every four Guatemalan parents in our study reported that they  
55  
56  
57  
58  
59  
60

1  
2  
3 preferred to share decision-making with their oncologists, however a similar proportion (69%)  
4  
5 ultimately wanted their medical team to decide what was best rather than provide multiple  
6  
7 options without a clear recommendation. These preferences are consistent with the decision-  
8  
9 making process noted in diagnostic conversations recorded at UNOP, after which most parents  
10  
11 expressed satisfaction. The model of decision-making at UNOP prioritizes trust, honesty, and  
12  
13 information-exchange but maintains a predominately unidirectional flow of information  
14  
15 (provider to parent) and does not include many choices. This model diverges from expectations  
16  
17 for shared decision-making set forth by literature from high-income countries but is consistent  
18  
19 with literature from other LMICs which describes an evolution in medical decision-making<sup>25</sup>  
20  
21 with increasing prioritization of information-exchange<sup>26</sup> and autonomy over time.<sup>27</sup> These  
22  
23 findings suggest there may be differences in cultural perceptions around shared decision-making,  
24  
25 and shared decision-making may have different manifestations in different contexts.  
26  
27  
28  
29  
30  
31  
32

33 Parents in our study also predominantly reported sharing decisions about their child's care with  
34  
35 the child's other parent, without significant input from their community. While there is limited  
36  
37 literature on extended family or community involvement in decision-making for children with  
38  
39 cancer, one study conducted in the UK demonstrated decisions were primarily made without  
40  
41 involvement of individuals outside the nuclear family,<sup>28</sup> consistent with our findings from  
42  
43 Guatemala. However, approximately a quarter of parent participants in our study did describe  
44  
45 consulting spiritual or religious advisors, emphasizing the importance of religion to this  
46  
47 community. Previous work also suggests that although diagnosis is a one of the most stressful  
48  
49 times for parents of children with cancer, it is a time when parents may feel most connected to  
50  
51 one another.<sup>29</sup> It is possible that this emotional connection explains the shared parental decision-  
52  
53  
54  
55  
56  
57  
58  
59  
60

1  
2  
3 making we noted among partnered participants, however it is also possible that sociocultural  
4 expectations influence this decision-making in Guatemala. This study included more mothers  
5 than fathers, which is representative of caregivers at UNOP where mothers often attend visits  
6 while fathers remain in the community, working to support the family. Mothers at UNOP may  
7 feel obligated to discuss decisions about their child's care with the child's father, whose opinions  
8 carry more weight. In addition, we found that mothers were less likely than fathers to have their  
9 desired role in decision-making. While the percentage of parents (approximately one-third) who  
10 did not have their preferred role in decision-making is nearly identical to that seen in high-  
11 income countries, parents in Guatemala who did not have their desired decision-making role  
12 tended to have a more active role than desired, whereas those in the United States tended to have  
13 a more passive role than desired.<sup>30</sup> The desire of parents, and particularly mothers, to play a more  
14 passive role in decision-making may reflect cultural disempowerment, a theme that has been  
15 previously described in pediatric cancer communication in LMICs.<sup>31,32</sup>

16  
17  
18  
19  
20  
21  
22  
23  
24  
25  
26  
27  
28  
29  
30  
31  
32  
33  
34  
35 Finally, parents included in this study report being primarily motivated by their child's health  
36 and well-being. This is consistent with the "good-parent" belief,<sup>33</sup> a concept which has been  
37 extensively studied in high-income settings<sup>34</sup> and includes "unselfish decisions in the child's best  
38 interest".<sup>33</sup> Most parents were satisfied with their decisions, however the small but relevant  
39 number of parents (11%) who experienced heightened decisional regret emphasizes the weight of  
40 cancer-related decisions and the importance of ongoing support. These findings reinforce the  
41 importance of exploring parental preferences for cancer communication and prioritizing  
42 individual familial needs, many of which may be influenced by culture.

1  
2  
3 This mixed-methods study allowed us to evaluate decision-making among Guatemalan parents  
4 of children with cancer, including a deep exploration of motivating factors and the decision-  
5 making process at UNOP. However, there are several limitations that should be considered. To  
6 reduce burden on participants, our study design included separate qualitative and quantitative  
7 samples which limited convergent analysis. This study focused specifically on decision-making  
8 at diagnosis, and thus does not address potential shifts in decision-making preferences or  
9 experiences over the cancer care continuum. In addition, this study was conducted at a single  
10 cancer center in one small middle-income country. This was an initial step toward exploring  
11 diagnostic communication and decision-making in LMICs and allowed for comparison to  
12 literature from high-income settings, but further research is needed to determine if these findings  
13 are applicable beyond Guatemala. Moreover, Guatemala itself is a diverse country. Our study  
14 was conducted exclusively in Spanish and thus we were unable to include parents who were not  
15 proficient in Spanish. Finally, because most parents included in our study had positive reflections  
16 on their decisions, we were limited in our ability to analyze the small proportion of parents who  
17 did experience regret. This is an opportunity for future research.  
18  
19  
20  
21  
22  
23  
24  
25  
26  
27  
28  
29  
30  
31  
32  
33  
34  
35  
36  
37  
38  
39

#### 40 Conclusion:

41  
42  
43  
44 Almost all prior work on decision-making in pediatric cancer care has been conducted  
45 exclusively in high-income settings including the United States and Europe.<sup>35</sup> This study  
46 demonstrates that many parents in Guatemala, like those in the United States, want to be engaged  
47 in decision-making by their oncology teams and prioritize their child's well-being. However,  
48 shared-decision making manifests differently in the Guatemalan context and differs from  
49  
50  
51  
52  
53  
54  
55  
56  
57  
58  
59  
60

1  
2  
3 previous definitions, most of which come from high-resourced settings. These findings suggest  
4  
5 ways in which culture may influence priorities for care. Ultimately, this work further supports  
6  
7 developing the provider-parent relationship in all settings by encouraging clinicians to routinely  
8  
9 ask parents what role they want to play in decision-making and honor their responses.  
10  
11  
12  
13  
14  
15  
16  
17  
18  
19  
20  
21  
22  
23  
24  
25  
26  
27  
28  
29  
30  
31  
32  
33  
34  
35  
36  
37  
38  
39  
40  
41  
42  
43  
44  
45  
46  
47  
48  
49  
50  
51  
52  
53  
54  
55  
56  
57  
58  
59  
60

For peer review only



## References

1. Kehl KL, Landrum MB, Arora NK, et al. Association of actual and preferred decision roles with patient-reported quality of care: Shared decision making in cancer care. *JAMA Oncology*. 2015;1(1):50-58. doi:10.1001/jamaoncol.2014.112
2. Hinds PS, Oakes L, Furman W, et al. Decision making by parents and healthcare professionals when considering continued care for pediatric patients with cancer. *Oncology nursing forum*. 1997;24(9):1523-1528. Accessed June 7, 2021. <https://pubmed.ncbi.nlm.nih.gov/9348593/>
3. Sisk BA, Kang TI, Goldstein R, DuBois JM, Mack JW. Decisional burden among parents of children with cancer. *Cancer*. 2019;125(8):1365-1372. doi:10.1002/cncr.31939
4. Derrington SF, Paquette E, Johnson KA. Cross-cultural Interactions and Shared Decision-making. *Pediatrics*. 2018;142(Supplement 3):S187-S192. doi:10.1542/PEDS.2018-0516J
5. Mack JW, Wolfe J, Grier HE, Cleary PD, Weeks JC. Communication about prognosis between parents and physicians of children with cancer: Parent preferences and the impact of prognostic information. *Journal of Clinical Oncology*. 2006;24(33):5265-5270. doi:10.1200/JCO.2006.06.5326
6. Sisk BA, Kang TI, Mack JW. The evolution of regret: decision-making for parents of children with cancer. *Supportive Care in Cancer*. Published online June 20, 2019:1-8. doi:10.1007/s00520-019-04933-8
7. Charles C, Gafni A, Whelan T, O'Brien MA. Cultural influences on the physician-patient encounter: The case of shared treatment decision-making. *Patient Education and Counseling*. 2006;63(3):262-267. doi:10.1016/J.PEC.2006.06.018
8. Graetz DE, Garza M, Rodriguez-Galindo C, Mack JW. Pediatric cancer communication in low- and middle-income countries: A scoping review. *Cancer*. Published online September 29, 2020:cncr.33222. doi:10.1002/cncr.33222
9. Ward ZJ, Yeh JM, Bhakta N, Frazier AL, Atun R. Estimating the total incidence of global childhood cancer: a simulation-based analysis. *The Lancet Oncology*. 2019;20(4):483-493. doi:10.1016/S1470-2045(18)30909-4
10. Ribeiro RC, Antillon F, Pedrosa F, Pui CH. Global pediatric oncology: Lessons from partnerships between high-income countries and low- to mid-income countries. *Journal of Clinical Oncology*. 2016;34(1):53-61. doi:10.1200/JCO.2015.61.9148
11. Palinkas LA, Horwitz SM, Green CA, et al. Purposeful sampling for qualitative data collection and analysis in mixed method implementation research. *Administration and policy in mental health*. Published online 2015. doi:10.1007/s10488-013-0528-y.Purposeful
12. Saunders B, Sim J, Kingstone T, et al. Saturation in qualitative research: exploring its conceptualization and operationalization. *Quality and Quantity*. 2018;52(4):1893-1907. doi:10.1007/s11135-017-0574-8
13. Elwyn G, Edwards A, Wensing M, et al. *Shared Decision Making Measurement Using the OPTION Instrument*. Accessed September 19, 2018. [http://www.glynelwyn.com/uploads/2/4/0/4/24040341/option\\_12\\_book.pdf](http://www.glynelwyn.com/uploads/2/4/0/4/24040341/option_12_book.pdf)
14. Brehaut JC, O'connor AM, Wood TJ, et al. ARTICLE Validation of a Decision Regret Scale. doi:10.1177/0272989X03256005

15. Mack JW, Cronin AM, Kang TI. Decisional regret among parents of children with cancer. *Journal of Clinical Oncology*. 2016;34(33):4023-4029. doi:10.1200/JCO.2016.69.1634
16. Elo S, Kyngäs H. The qualitative content analysis process. *Journal of Advanced Nursing*. 2008;62(1):107-115. doi:10.1111/j.1365-2648.2007.04569.x
17. Roter D, Larson S. The Roter interaction analysis system (RIAS): Utility and flexibility for analysis of medical interactions. *Patient Education and Counseling*. 2002;46(4):243-251. doi:10.1016/S0738-3991(02)00012-5
18. Street RL. Article in Health Communication. Published online 2001. doi:10.1207/S15327027HC1301\_06
19. Tong A, Sainsbury P, Craig J. Consolidated criteria for reporting qualitative research (COREQ): a 32-item checklist for interviews and focus groups. *International Journal for Quality in Health Care*. 2007;19(6):349-357. doi:10.1093/intqhc/mzm042
20. Sung L, Regier DA. Decision making in pediatric oncology: Evaluation and incorporation of patient and parent preferences. *Pediatric Blood and Cancer*. 2013;60(4):558-563. doi:10.1002/pbc.24450
21. Mercurio MR, Forman EN, Ladd RE, Maxwell MA, Ross LF, Silber TJ. American academy of pediatrics policy statements on bioethics: Summaries and commentaries: Part 3. *Pediatrics in Review*. 2008;29(5). doi:10.1542/pir.29-5-e28
22. Elwyn G, Frosch D, Thomson R, et al. Shared Decision Making: A Model for Clinical Practice. *Journal of General Internal Medicine*. 2012;27(10):1361-1367. doi:10.1007/s11606-012-2077-6
23. Boland L, Graham ID, Légaré F, et al. Barriers and facilitators of pediatric shared decision-making: A systematic review. *Implementation Science*. 2019;14(1):1-25. doi:10.1186/s13012-018-0851-5
24. Charles C, Gafni A, Whelan T. Decision-making in the physician-patient encounter: revisiting the shared treatment decision-making model. *Social Science & Medicine*. 1999;49(5):651-661. doi:10.1016/S0277-9536(99)00145-8
25. Vučemilović M, Mahmić-Kaknjo M, Pavličević I. Transition from paternalism to shared decision making - a review of the educational environment in Bosnia and Herzegovina and Croatia. *Acta medica academica*. 2016;45(1):61-69. doi:10.5644/ama2006-124.157
26. Kilicarlsan-Toruner E, Akgun-Citak E. Information-seeking behaviours and decision-making process of parents of children with cancer. *European Journal of Oncology Nursing*. 2013;17(2):176-183. doi:10.1016/j.ejon.2012.03.001
27. Cicero-Oneto CE, Valdez-Martinez E, Bedolla M. Decision-making on therapeutic futility in Mexican adolescents with cancer: A qualitative study. *BMC Medical Ethics*. 2017;18(1). doi:10.1186/s12910-017-0231-8
28. McKENNA K, Blake H. Parental involvement in paediatric cancer treatment decisionse cc\_1116 621..630 Parental involvement in paediatric cancer treatment decisions. *European Journal of Cancer Care*. 2010;19:621-630. doi:10.1111/j.1365-2354.2009.01116.x
29. Wiener L, Battles H, Zadeh S, Pelletier W, Arruda-Colli M, Muriel A. The perceived influence of childhood cancer on the parents' relationship HHS Public Access. *Psychooncology*. 2017;26(12):2109-2117. doi:10.1002/pon.4313
30. Mack JW, Wolfe J, Cook EF, Grier HE, Cleary PD, Weeks JC. Parents' Roles in Decision Making for Children With Cancer in the First Year of Cancer Treatment. *Journal of Clinical Oncology*. 2011;29(15):2085-2090. doi:10.1200/JCO.2010.32.0507

- 1  
2  
3 31. Kohlsdorf M, Luiz Á, Junior C. Associations between clinical and sociodemographic data  
4 and patterns of communication in pediatric oncology. Published online 2016.  
5 doi:10.1186/s41155-016-0028-6  
6  
7 32. Renner LA, McGill D. Exploring factors influencing health-seeking decisions and  
8 retention in childhood cancer treatment programmes: perspectives of parents in Ghana.  
9 *Ghana medical journal*. 2016;50(3):149-156.  
10  
11 33. Hinds PS, Oakes LL, Hicks J, et al. “Trying to be a good parent” as defined by interviews  
12 with parents who made phase I, terminal care, and resuscitation decisions for their  
13 children. *Journal of Clinical Oncology*. 2009;27(35):5979-5985.  
14 doi:10.1200/JCO.2008.20.0204  
15  
16 34. Weaver MS, October T, October T, et al. “Good-Parent Beliefs”: Research, concept, and  
17 clinical practice. *Pediatrics*. 2020;145(6). doi:10.1542/peds.2019-4018  
18  
19 35. Sisk BA, Mack JW, Ashworth R, DuBois J. Communication in pediatric oncology: State  
20 of the field and research agenda. *Pediatric Blood & Cancer*. 2017;(June 2017):e26727.  
21 doi:10.1002/pbc.26727  
22  
23  
24  
25  
26  
27  
28  
29  
30  
31  
32  
33  
34  
35  
36  
37  
38  
39  
40  
41  
42  
43  
44  
45  
46  
47  
48  
49  
50  
51  
52  
53  
54  
55  
56  
57  
58  
59  
60

**Table 1. Sociodemographic characteristics of participating caregivers and their children**

|                                              | <b>Quantitative sample<br/>(total = 100)</b> | <b>Qualitative sample<br/>(total = 20)</b> |
|----------------------------------------------|----------------------------------------------|--------------------------------------------|
| <b>Participant</b>                           | <b>N (%)</b>                                 | <b>N (%)</b>                               |
| <b>Relationship to patient</b>               |                                              |                                            |
| Mother                                       | 76 (76%)                                     | 13 (65%)                                   |
| Father                                       | 22 (22%)                                     | 7 (35%)                                    |
| Grandparent                                  | 1 (1%)                                       | 0 (0%)                                     |
| Sibling                                      | 1 (1%)                                       | 0 (0%)                                     |
| <b>Gender</b>                                |                                              |                                            |
| Male                                         | 23 (23%)                                     | 7 (35%)                                    |
| Female                                       | 77 (77%)                                     | 13 (65%)                                   |
| <b>Primary language</b>                      |                                              |                                            |
| Spanish (only)                               | 73 (73%)                                     | 13 (65%)                                   |
| Spanish and English                          | 2 (2%)                                       | 0 (0%)                                     |
| Spanish and Mayan dialect                    | 24 (24%)                                     | 7 (35%)                                    |
| Mayan dialect (only)                         | 1 (1%)                                       | 0 (0%)                                     |
| <b>Ethnicity*</b>                            |                                              | Data not collected                         |
| Ladino                                       | 55 (56%)                                     |                                            |
| Indigenous (Mayan)                           | 25 (25%)                                     |                                            |
| Mixed race                                   | 19 (19%)                                     |                                            |
| <b>Religion</b>                              |                                              |                                            |
| Catholic                                     | 41 (41%)                                     | 4 (20%)                                    |
| Evangelical                                  | 52 (52%)                                     | 13 (65%)                                   |
| Other identified religion                    | 3 (3%)                                       | 2 (10%)                                    |
| No religion                                  | 4 (4%)                                       | 1 (5)                                      |
| <b>Civil status*</b>                         |                                              |                                            |
| Married                                      | 59 (60%)                                     | 13 (65%)                                   |
| United (living together as if married)       | 25 (25%)                                     | 6 (30%)                                    |
| Separated                                    | 1 (1%)                                       | 0 (0%)                                     |
| Divorced                                     | 10 (10%)                                     | 1 (5%)                                     |
| Single                                       | 4 (4%)                                       | 0 (0%)                                     |
| <b>Monthly household income (Quetzales)*</b> |                                              | Data not collected                         |
| <2000                                        | 36 (37%)                                     |                                            |
| 2000-2999                                    | 23 (23%)                                     |                                            |
| >2999                                        | 39 (40%)                                     |                                            |
| <b>Patient</b>                               |                                              |                                            |
| <b>Age (years)</b>                           |                                              |                                            |
| 0-5                                          | 38 (38%)                                     | 6 (30%)                                    |
| 6-10                                         | 19 (19%)                                     | 6 (30%)                                    |
| 11-15                                        | 31 (31%)                                     | 4 (20%)                                    |
| 16-18                                        | 12 (12%)                                     | 4 (20%)                                    |
| <b>Gender</b>                                |                                              |                                            |
| Male                                         | 61 (61%)                                     | 11 (55%)                                   |
| Female                                       | 39 (39%)                                     | 9 (45%)                                    |

| Diagnosis             |          |          |
|-----------------------|----------|----------|
| Leukemia              | 58 (58%) | 13 (65%) |
| Lymphoma              | 12 (12%) | 2 (10%)  |
| Histiocytic disorders | 2 (2%)   | 1 (5%)   |
| Solid tumor           | 25 (25%) | 3 (15%)  |
| Brain tumor           | 3 (3%)   | 1 (5%)   |

\* Ethnicity: 1 missing; Civil status: 1 missing; Monthly household income (Quetzales): 2 missing

For peer review only

**Table 2. Excerpts from recorded diagnostic conversations emphasizing teamwork and honesty over autonomy**

| Theme                 | Psychologists speaking to parents during intake                                                                                                                                                                                                                                                                                        | Oncologists speaking to parents in diagnostic conversations                                                                                                                                                                                                                                                                                                                                                                                           |
|-----------------------|----------------------------------------------------------------------------------------------------------------------------------------------------------------------------------------------------------------------------------------------------------------------------------------------------------------------------------------|-------------------------------------------------------------------------------------------------------------------------------------------------------------------------------------------------------------------------------------------------------------------------------------------------------------------------------------------------------------------------------------------------------------------------------------------------------|
| <b>Teamwork</b>       | <p><i>“You see we are all a team.”</i></p> <p><i>“I want you to know that we are a team and we will always tell the truth.”</i></p> <p><i>“In here, each doctor has his specialty...each of them in their own working area, but we are still a team.”</i></p>                                                                          | <p><i>“We want to remark that we are a team...and we are all here to support you. We are a big team so one of us will be ready to answer all your questions. No matter if it’s good or bad, you deserve to know it.”</i></p> <p><i>“We are a lot of people that work for all children’s recovery...There’s a huge hope and you have the entire medical staff and the hospital staff next to you, working together to make [your son] better.”</i></p> |
| <b>Honesty</b>        | <p><i>“We will be very honest with you; we won’t lie to you...Anything that comes up, I’ll let you know”</i></p> <p><i>“I know no one likes bad news, but as a parent you deserve the truth...Like I told you, doctors will be very honest with you.”</i></p> <p><i>“Here, they will always tell you everything.”</i></p>              | <p><i>“Another important thing. We are always going to be very honest with you, if anything comes up, we will seat down with you and talk to you.”</i></p> <p><i>“We won’t lie to you, of course it’s going to be hard, this is going to feel like a roller coaster, there will be good days and there will be hard days, but we will be with you on good days and hard days.”</i></p>                                                                |
| <b>Lack of choice</b> | <p><i>“What we definitely have to do is surgery, that’s essential to cure this type of cancer.”</i></p> <p><i>“Therefore, is so important that once we detect it, we must give treatment immediately.”</i></p> <p><i>“With these, the only treatment is surgery...If we want to save [your son], we must perform the surgery.”</i></p> | <p><i>“Unfortunately, he must stay here for now, but after a while he’ll be able to go home for some time or to the shelter.”</i></p> <p><i>“It’s going to be difficult, because I’m not telling you it’s going to be easy or that don’t have to make sacrifices, but if you want to see [your daughter] cured, just like us, this is the road we must follow.”</i></p>                                                                               |

**Table 3. Univariate logistic regression analysis of sociodemographic factors and preferred decision-making role**

| <b>Decision-Making</b>                             |                |                      |
|----------------------------------------------------|----------------|----------------------|
| <b>Factor</b>                                      | <b>P-Value</b> | <b>Odds Ratio</b>    |
| <b>Parent (N=96)</b>                               | 0.02*          |                      |
| <b>Father</b>                                      |                | 4.32 (1.17 - 15.89)  |
| <b>Mother</b>                                      |                | 1.00 (Ref)           |
| <b>Ethnicity (N=97)</b>                            | 0.70           |                      |
| <b>Ladino</b>                                      |                | 1.49 (0.51 - 4.36)   |
| <b>Indigenous (Mayan)</b>                          |                | 1.66 (0.47 - 5.93)   |
| <b>Mixed race</b>                                  |                | 1.00 (Ref)           |
| <b>Monthly household Income (Quetzales) (N=96)</b> | 0.60           |                      |
| <b>&lt;2000</b>                                    |                | 1.00 (Ref)           |
| <b>2000-2999</b>                                   |                | 1.43 ( 0.46 - 4.39 ) |
| <b>&gt;2999</b>                                    |                | 1.61 ( 0.62 - 4.15 ) |
| <b>Diagnosis group (N=98)</b>                      | 0.12           |                      |
| <b>Leukemia</b>                                    |                | 1.00 (Ref)           |
| <b>Lymphoma</b>                                    |                | 8.25 (1.00 - 68.35)  |
| <b>Solid tumor</b>                                 |                | 1.59 (0.59 - 4.30)   |
| <b>Others (Histiocytic disorder + Brain tumor)</b> |                | 3.00 (0.31 - 28.59)  |

\*significant p-value

**Table 4. Univariate logistic regression analysis of heightened decisional regret**

| <b>Decisional regret</b>                                             |                |                     |
|----------------------------------------------------------------------|----------------|---------------------|
| <b>Factor</b>                                                        | <b>P-Value</b> | <b>Odds Ratio</b>   |
| <b>Parent (N=98)</b>                                                 | 0.68           |                     |
| <b>Father</b>                                                        |                | 1.34 (0.32 - 5.56)  |
| <b>Mother</b>                                                        |                | 1.00 (Ref)          |
| <b>Ethnicity (N=99)</b>                                              | 0.16           |                     |
| <b>Ladino</b>                                                        |                | 1.41 (0.15 - 13.48) |
| <b>Indigenous (Mayan)</b>                                            |                | 4.50 (0.48 - 42.25) |
| <b>Mixed race</b>                                                    |                | 1.00 (Ref)          |
| <b>Monthly household Income (Quetzales) (N=98)</b>                   | 0.27           |                     |
| <b>&lt;2000</b>                                                      |                | 1.00 (Ref)          |
| <b>2000-2999</b>                                                     |                | 0.75 (0.17 - 3.35)  |
| <b>&gt;2999</b>                                                      |                | 0.27 (0.05 - 1.44)  |
| <b>Diagnosis group (N=100)</b>                                       | 0.57           |                     |
| <b>Leukemia</b>                                                      |                | 1.00 (Ref)          |
| <b>Lymphoma</b>                                                      |                | 0.57 (0.06 - 5.02)  |
| <b>Others<br/>(Brain tumor + Histiocytic disorder + Solid tumor)</b> |                | 0.45 (0.09 - 2.25)  |
| <b>Decision Engagement (N=98)</b>                                    | 0.71           |                     |
| <b>Preferred</b>                                                     |                | 0.78 (0.20 - 2.96)  |
| <b>Not preferred</b>                                                 |                | 1.00 (Ref)          |



## Supplemental Material

### Cancer Treatment Decision-Making among Parents of Pediatric Oncology Patients in Guatemala

Dylan E. Graetz MD MPH, Silvia Elena Rivas MD, Huiqi Wang MS, Yuvanesh Vedaraju MS, Gia Ferrara MSGH, Ana Lucia Fuentes, Annie Caceres-Serrano PhD, Federico Antillon-Klussmann MD PhD, Meenakshi Devidas PhD MBA, Monika L. Metzger MD MS, Carlos Rodriguez-Galindo MD, Jennifer W. Mack MD MPH

| Section         | Page  |
|-----------------|-------|
| Interview Guide | 2-3   |
| Survey          | 4-17  |
| Codebook        | 18-20 |

## 1. Interview Guide

1. Tell me about your experience at UNOP.
  - a. Who told you to come?... how did you get here?... when did you arrive?... What happened next...?
    - i. Where did you stay while your child was being diagnosed?
    - ii. Who came to the visits?
    - iii. Who visited you while you were here?
    - iv. Who did you meet with?
    - v. What testing was done?
2. Before your child was diagnosed, what did cancer mean to you? What had you heard about cancer?
  - a. Did you know anyone with cancer?
  - b. How do people in your community think about cancer?
  - c. Had you heard the word before? How did you first hear it/learn about it?
3. Tell me, did you go to another hospital or receive treatment anywhere before you came to UNOP?
  - a. If so, where?
  - b. What did they tell you about your child and his/her illness?
  - c. Did you try any medicines or remedies before coming to UNOP?
    - i. What happened with these?
4. At the time your child was diagnosed at UNOP, who explained cancer to you?
  - a. How did they explain it?
  - b. How was that similar to what you already understood/believed about cancer?
  - c. How was it different to what you understood/believed about cancer?
  - d. Did you talk to the team about these similarities/differences? Were all of your questions answered/addressed?
  - e. How does this relate to your other experiences with illness?
    - i. How is it similar/different?
5. What is your understanding of cancer now?
  - a. How did you reach this understanding?
  - b. Is this similar to or different from what your family thinks about cancer?
  - c. Is it similar to or different from what others in your community think about cancer?
  - d. Is it similar to or different from what the doctors and nurses think?
  - e. Do you still have questions or concerns?
6. Tell me about how you usually make important decisions in your family/community.
  - a. There are lots of decisions a family has to make, for example, some families have to make decisions about how to spend money or whether their children will work or go to school. Who is responsible for making decisions in your family?
    - i. Are there others who have input in decisions?
    - ii. What is your level of involvement in decisions? Would you say you are mostly responsible for decisions alone? Do you share that responsibility? With whom? Do you have more limited input?
  - b. How is this similar to or different from the way your family has made decisions about your child's cancer?
    - i. Who is responsible for coming to appointments with your child?
    - ii. How is information from those visits shared with others in your family? In your community?
    - iii. What do you need to help you make decisions about your child's diagnosis and treatment?

- 1  
2  
3  
4  
5  
6  
7  
8  
9  
10  
11  
12  
13  
14  
15  
16  
17  
18  
19  
20  
21  
22  
23  
24  
25  
26  
27  
28  
29  
30  
31  
32  
33  
34  
35  
36  
37  
38  
39  
40  
41  
42  
43  
44  
45  
46  
47  
48  
49  
50  
51  
52  
53  
54  
55  
56  
57  
58  
59  
60
- iv. Does your child have a say in decisions regarding his or her care?
  - v. Have there been disagreements about what to do for your child? Tell me more about those disagreements and how your family has handled that?
7. Now I would like to learn more about how you are feeling and what you are thinking about during this time, shortly after having a child diagnosed with cancer.
- a. Who supports you during this time?
  - b. What changes have you had to make to your life/family?
  - c. Have you felt supported by the team at UNOP? How, or how not? By whom?
  - d. What are you worried about during this time? How does the staff at UNOP address these worries?
  - e. What are you most hoping for during this time? How does the team at UNOP address these hopes?
  - f. As you think about these hopes and worries for your child, which ones stand out as being the most important to you?
  - g. How have your hopes and worries about other things in your life changed since having a child diagnosed with cancer?
8. If you had the opportunity now to speak with other parents of a child recently diagnosed with cancer, what would you tell them? What advice would you give them?

## 2. Survey

### Instructions for the interviewer:

- When conducting this interview (starting with the section titled “Demographic questions”) read all lowercase text aloud to the respondent.
- Instructions for interviewers are provided throughout the questionnaire in capital letters. Words appearing in capital letters are meant to guide the interviewer and should NOT be read aloud.
- Read instructions written in lowercase letters aloud to the respondent to guide him/her in answering the question.
- It is important to read questions in their entirety, exactly as they are written
- Many of the questions have answer choices. It is important for the interviewer to read *all* the answer choices aloud to the respondent before pausing for a response.
- If the respondent does not understand the question, first the interviewer must repeat the whole question. For some questions, there is an alternative explanation that the interviewer can use if the respondent still does not understand the question. If, after repeating twice and using the alternative explanation (if provided), the respondent still does not understand, the interviewer can explain in a few additional words before moving on to the next question and leaving it unanswered.
- If the respondent’s answer is not clear, the interviewer should repeat all of the response options and wait for a clear answer.
- For the questions involving a scale, the scale should be handed to the respondent before the question is read. For each question, the interviewer must point out the options with his finger, for example show “strongly agree”, “slightly agree” and “disagree”. Then, the respondent must use his/her finger to indicate an option and the interviewer will record this choice on the survey.
- The interviewer will be expected to fill out the survey as it is read aloud. Circle the number corresponding to the answer chosen by the respondent. For fill-in or open text answers, write the appropriate information as stated by the respondent.
- It is important that the interviewer is familiar with the instrument before conducting the interviews.

- At the end of the interview, the interviewer should gather a copy of the corresponding patient's demographic sheet (completed by the social worker) and use the medical chart to find the corresponding answers for questions 7-13.

Introduction to the survey:

*Thank you very much for your time and your participation in our study. The purpose of the study is to learn about the experiences and preferences of parents of children with cancer. We hope that the results of this survey will help us better care for parents and children who come to our hospital in the future. Your answers will not affect your child's care, and your medical team will not know your answers to our questions. We would like to hear your opinions and we are not looking for a "correct" answer. Please, be honest with us. Also, since we are going to review the data all together and anonymously it is important that we gather some information about you that may seem obvious while we talk, such as your gender. Although that seems obvious to us now, it is important that I ask these things and that you answer me honestly. Thank you for your participation.*

peer review only

**Demographic questions** – *Now we are going to ask you a few questions about yourself*

1. What is your gender? [IF THEY DO NOT UNDERSTAND ASK: “Are you a...?”]

- Man  
 Woman

2. What is your relationship to the child?

- Parent  
 Sibling  
 Grandparent  
 Aunt/Uncle  
 Legal guardian  
 Other relative (*Please specify*)

3. What language do you speak at home?  
*Choose all that apply*

- English  
 Spanish  
 K'che  
 Q'eqchi'  
 Kaqchikel  
 Mam  
 Poqomchi  
 Tz'utujil  
 Achi  
 Q'anjob'al  
 Ixil  
 Akatek  
 Jakalteq  
 Chuj  
 Poqomam  
 Ch'orti'

- Awakatek  
 Sakapultek  
 Sipakapa  
 Garifuna  
 USpantek  
 Tekitek  
 Mopan  
 Xincan  
 Itza  
 Other (*please specify*)

4. What ethnicity are you? *Choose all that apply.*

- White/Caucasian (European descent)  
 Mestizo  
 Quiché  
 Kaqchikel  
 Mam  
 Quekchí  
 Black Hispanic  
 Other (*please specify*) \_\_\_\_\_

5. What is your religion?

- Catholic  
 Evangelical  
 Other (*please specify*\_\_\_\_)  
 No religion

6. Do you believe in the Mayan spirituality?

- Yes  
 A little  
 No

1  
2  
3  
4  
5  
6  
7  
8  
9  
10  
11  
12  
13  
14  
15  
16  
17  
18  
19  
20  
21  
22  
23  
24  
25  
26  
27  
28  
29  
30  
31  
32  
33  
34  
35  
36  
37  
38  
39  
40  
41  
42  
43  
44  
45  
46  
47  
48  
49  
50  
51  
52  
53  
54  
55  
56  
57  
58  
59  
60

For peer review only

1  
2  
3 **Medical information** – *Now we will ask a few questions about your child's illness and*  
4 *treatment*  
5

6  
7 7. What is the name of your child's diagnosis?

8  
9 8. Where in your child's body is the [USE THE WORD PARENT USED IN QUESTION  
10 #5] located?  
11

12 9. Has the [USE THE WORD PARENT USED IN QUESTION #5] spread to other places  
13 in the body?  
14

15  Yes

16  No  
17

18 10. How long will all of your child's treatment last? *Please check one.*

19  Less than 6 months

20  6 months to 1 year

21  More than 1 year, but less than 2 years

22  2 years or more  
23  
24

25 11. Which of the following will be part of the treatment of your child's cancer? *Please*  
26 *check all that apply.*

27  Chemotherapy

28  Surgery

29  Radiation treatment  
30  
31

32 12. What is **your** main goal of your child's cancer treatment? *Choose one.*

33  To cure my child's cancer

34  To help my child live longer

35  To decrease symptoms from the cancer  
36  
37

38 13. What is your understanding of **your medical team's** main goal of your child's  
39 cancer treatment? *Choose one.*

40  To cure my child's cancer

41  To help my child live longer

42  To decrease symptoms from the cancer  
43  
44  
45  
46  
47  
48  
49  
50  
51  
52  
53  
54  
55  
56  
57  
58  
59  
60



**Information Exchange** – Now we are going to ask you a few questions about how you learned about your child's illness, including what you think has caused your child's illness, and who/what information was most important, influential, or useful to you when he/she was diagnosed

14. Parents have different ideas about where cancer comes from and we would like to hear from you. How much do you think the following factors explain why your child got cancer?

|                              | <i>A lot</i>             | <i>A little</i>          | <i>Not at all</i>        |
|------------------------------|--------------------------|--------------------------|--------------------------|
| Caused by an infection       | <input type="checkbox"/> | <input type="checkbox"/> | <input type="checkbox"/> |
| Due to heat or cold          | <input type="checkbox"/> | <input type="checkbox"/> | <input type="checkbox"/> |
| Lacking hygiene or nutrition | <input type="checkbox"/> | <input type="checkbox"/> | <input type="checkbox"/> |
| Because of a sacred mission  | <input type="checkbox"/> | <input type="checkbox"/> | <input type="checkbox"/> |

How much do you think the following factors explain why your child got cancer?

|                                                                                              | <i>A lot</i>             | <i>A little</i>          | <i>Not at all</i>        |
|----------------------------------------------------------------------------------------------|--------------------------|--------------------------|--------------------------|
| Due to bad thoughts ( <i>malhecho</i> )                                                      | <input type="checkbox"/> | <input type="checkbox"/> | <input type="checkbox"/> |
| Sent by the devil ( <i>diabólico</i> )                                                       | <input type="checkbox"/> | <input type="checkbox"/> | <input type="checkbox"/> |
| Supernatural; originating from natural elements (e.g. waterfalls, mountains, wind, darkness) | <input type="checkbox"/> | <input type="checkbox"/> | <input type="checkbox"/> |

How much do you think the following factors explain why your child got cancer?

|                                                               | <i>A lot</i>             | <i>A little</i>          | <i>Not at all</i>        |
|---------------------------------------------------------------|--------------------------|--------------------------|--------------------------|
| Lack of respect for nature or the elements of the environment | <input type="checkbox"/> | <input type="checkbox"/> | <input type="checkbox"/> |
| Bad relationships with the community                          | <input type="checkbox"/> | <input type="checkbox"/> | <input type="checkbox"/> |
| Caused by God or another religious figure                     | <input type="checkbox"/> | <input type="checkbox"/> | <input type="checkbox"/> |

How much do you think the following factors explain why your child got cancer?

|                                             | <i>A lot</i>             | <i>A little</i>          | <i>Not at all</i>        |
|---------------------------------------------|--------------------------|--------------------------|--------------------------|
| Caused by uncontrol cell growth             | <input type="checkbox"/> | <input type="checkbox"/> | <input type="checkbox"/> |
| Caused by fear or surprise ( <i>susto</i> ) | <input type="checkbox"/> | <input type="checkbox"/> | <input type="checkbox"/> |
| Caused by medications                       | <input type="checkbox"/> | <input type="checkbox"/> | <input type="checkbox"/> |

1  
2  
3 15. Please look at this paper with different color circles. On the left, there are many  
4 green circles. These indicate something that you found very important. In the middle,  
5 there are just a few yellow circles. These represent something that for you was a little bit  
6 important. And on the right, after the red line, there are not any circles. This indicates  
7 something that wasn't important for you at all.  
8  
9

10 Please, show me with your finger how useful or important each of the following things  
11 was for you as a **source of information regarding your child's cancer**.  
12

- 13 • Conversations with your medical team at UNOP (including oncologists,  
14 psychologists, nurses, social workers)  
15
- 16 • Conversations within your community (for example, with neighbors,  
17 community leaders...)  
18
- 19 • Conversations with your family (siblings, grandparents, aunts, uncles)  
20  
21

22  
23 Please, show me with your finger how useful or important each of the following things  
24 was for you as a **source of information regarding your child's cancer**.  
25

- 26 • Conversations with leaders in your religious or spiritual community  
27
- 28 • An understanding within yourself (including a feeling, hunch or dream)  
29
- 30 • Reading in books or looking for information on the internet  
31  
32

33 16. Parents differ in the amount of information that they want to know about their child's  
34 *diagnosis and treatment*—some want to know everything, others want to know very  
35 little. What is your preference for details of information about your child's diagnosis and  
36 treatment? *Choose one*.  
37  
38

- 39  I want to hear as many details as possible in all situations relating to my child's  
40 cancer and its treatment.
- 41  I want to hear details only in certain situations, in other situations I do not want to  
42 hear the details
- 43  I prefer not to hear a lot of details.  
44  
45

46 17. How *important* is it to you to know about your child's likelihood of being cured?

- 47  It is very important for me to know the likelihood of cure
- 48  It is not very important for me to know the likelihood of cure
- 49  I prefer not to know the likelihood of cure  
50  
51

52 18. How important is it to you to know about how likely it is that cancer or its treatment  
53 may affect your child's life in the future?

- 54  It is very important for me to know the likelihood this treatment affecting my child
- 55  It is not very important for me to know the likelihood this treatment affecting my child  
56  
57  
58  
59  
60

1  
2  
3  
4  
5  
6  
7  
8  
9  
10  
11  
12  
13  
14  
15  
16  
17  
18  
19  
20  
21  
22  
23  
24  
25  
26  
27  
28  
29  
30  
31  
32  
33  
34  
35  
36  
37  
38  
39  
40  
41  
42  
43  
44  
45  
46  
47  
48  
49  
50  
51  
52  
53  
54  
55  
56  
57  
58  
59  
60

I prefer not to know the likelihood this treatment affecting my child

For peer review only

1  
2  
3 19. Now, using the same colored circles, we would like to ask you about your  
4 preferences regarding the **way** in which your medical team communicates. Remember  
5 that, on the left, there are many green circles, and these indicate something that is very  
6 important for you. In the middle there are a few yellow circles which represent  
7 something that is slightly important for you. On the right, after the red line, there are not  
8 any circles. This indicates something that is not important to you.  
9  
10

11  
12 We would like to know, how important is it to you that your doctors and other health  
13 professionals...  
14

- 15
- 16
- 17 • Explain things in a way I can understand
- 18
- 19 • Are open and honest with me
- 20
- 21
- 22 • Involve me in making decisions about my child's care
- 23
- 24 • Pay attention to my emotions and feelings
- 25

26 How important is it to you that your doctors and other health professionals...?  
27

- 28
- 29 • Help me deal with the things nobody knows related to my child's cancer
- 30
- 31 • Help me understand ways to take care of my child while I'm dealing with  
32 cancer
- 33
- 34 • Ask about my culture, background, and beliefs
- 35
- 36
- 37
- 38

39 20. At the time of diagnosis, did the doctor ask about your previous knowledge about  
40 cancer? *Choose one.*  
41

- 42  Yes
- 43  No
- 44
- 45
- 46

47 21. How often do you feel like you are given the information that is important to you  
48 without needing to ask for it? *Choose one.*  
49

- 50  Always
- 51  Sometimes
- 52  Never
- 53
- 54
- 55
- 56
- 57
- 58
- 59
- 60

1  
2  
3 22. When you see your child's doctor, how often do you have questions about your  
4 child's care that you want to discuss but do not? *Choose one.*

- 5  
6  Always  
7  Sometimes  
8  Never  
9

10  
11  
12 [IF THE RESPONDENT DOES NOT UNDERSTAND ASK: When you have questions  
13 for your doctor, how often are you too afraid to ask them?

- 14  Always  
15  Sometimes  
16  Never  
17  
18  
19  
20  
21  
22  
23  
24  
25  
26  
27  
28  
29  
30  
31  
32  
33  
34  
35  
36  
37  
38  
39  
40  
41  
42  
43  
44  
45  
46  
47  
48  
49  
50  
51  
52  
53  
54  
55  
56  
57  
58  
59  
60

1  
2  
3 **Decision Making** – We are now going to ask you about how you and your family make  
4 decisions. First, in general, and then specifically how you have made decisions  
5 regarding your child's treatment.  
6  
7

8 23. Who do you consider to be the person who makes most decisions in your house in  
9 general? These might be decisions about care of the children, where the family lives, or  
10 how money is spent, for example. *Choose one.*

- 11  I am the person most involved in making decisions.  
12  I share decision-making equally with my child's other parent or other family member.  
13  Another parent or family member makes most of the decisions in my house  
14  
15

16 24. Who do you consider to be the parent most involved in making decisions about your  
17 child's cancer treatment? *Choose one.*

- 18  I am the parent most involved in making decisions.  
19  I share decision-making equally with my child's other parent or other family member.  
20  Another parent or family member makes most of the decisions for my child's  
21 treatment.  
22  
23

24 25. Parents differ in the ways they prefer to make treatment decisions for their children.  
25 Which statement best describes the role you **would prefer** to play when decisions  
26 about treatment for your child's cancer are made? *Please check one.*

- 27  I prefer to make the decisions about treatment  
28  I prefer that my child's oncologist and I make the decisions together.  
29  I prefer that my child's oncologist make most of the decisions  
30  
31  
32

33 26. Which statement best describes the role you **actually played** when making  
34 decisions about treatment for your child's cancer? *Please check one.*

- 35  I made the decisions about treatment  
36  My child's oncologist and I made the decisions together.  
37  My child's oncologist made the decisions  
38  
39

40 27. Some families have help making decisions from people in their community, which  
41 statement best describes the role your community played in helping you make  
42 decisions? *Choose one*

- 43  I/We made the decisions about treatment without input from my community  
44  I/We made the decisions with help from members or leaders in my community  
45  My community, or a leader in my community, made the decision and told me what  
46 was best  
47  
48

49 28. Some families have help making decisions from religious or spiritual leaders, which  
50 statement best describes the role your religious/spiritual leaders played in helping you  
51 make decisions? *Choose one.*

- 52  I/We made the decisions about treatment without input from religious or spiritual  
53 leaders  
54  I/We made the decisions with help from religious or spiritual leaders  
55  
56  
57  
58  
59  
60

1  
2  
3  My spiritual or religious leaders made the decision and told me what was best  
4  
5

6 29. At the time of diagnosis, which of the following statements best describes how your  
7 oncologist explained your child's treatment plan. *Please check one*

8  He/she gave me different options and I chose what was best

9  He/she gave me different options, and he/she told me what was best

10  He/she gave me only one option  
11  
12  
13  
14  
15  
16  
17  
18  
19  
20  
21  
22  
23  
24  
25  
26  
27  
28  
29  
30  
31  
32  
33  
34  
35  
36  
37  
38  
39  
40  
41  
42  
43  
44  
45  
46  
47  
48  
49  
50  
51  
52  
53  
54  
55  
56  
57  
58  
59  
60

1  
2  
3 30. Using the colored circles again, but this time we would like to know **how much you**  
4 **agree or disagree with the following statements**. Remember that on the left there  
5 are many green circles. These indicate something you completely agree with. In the  
6 middle, the few yellow circles, indicate something that you slightly agree with. And on  
7 the right, after the red line, there are no circles. This indicates something you disagree  
8 with.  
9

10  
11 Now I would like to know what you think about the decisions you have made related to  
12 your child's cancer.  
13

#### 14 **How much do you agree or disagree with...**

- 15
- 16
- 17 • I have made the right decisions
- 18
- 19 • I regret the choices that were made
- 20
- 21
- 22 • I would make the same choices if I had to do it all over again
- 23
- 24 • My choices did my child harm
- 25
- 26 • The decisions were wise
- 27
- 28
- 29
- 30
- 31
- 32
- 33
- 34
- 35
- 36
- 37
- 38
- 39
- 40
- 41
- 42
- 43
- 44
- 45
- 46
- 47
- 48
- 49
- 50
- 51
- 52
- 53
- 54
- 55
- 56
- 57
- 58
- 59
- 60



1  
2  
3 **Medical team** – Now we are going to ask you a little bit about the team taking care of  
4 you at UNOP, and your relationship with this team.  
5

6  
7 31. We will use the circles again, but this time we would like to know **how much you**  
8 **agree or disagree with the following statements**. As always, on the left there are  
9 many green circles. These indicate something you completely agree with. In the middle,  
10 the few yellow circles, indicate something that you slightly agree with. And on the right,  
11 after the red line, there are no circles. This indicates something you disagree with.  
12

13 **How much do you agree with each of the following statements about your child's**  
14 **doctors?**  
15

- 16 • I trust my child's doctors
- 17
- 18 • My child's doctors ask about how my family is coping with cancer
- 19
- 20 • My child's doctors care about my child's quality of life
- 21
- 22 • My child's doctors offer my family hope
- 23
- 24
- 25
- 26

27  
28 32. Using the colored circles, **how much do you agree with each of the following**  
29 **statements regarding doctors in general?**  
30

- 31 • Doctors are prying too much into personal matters when they ask a lot of  
32 questions about a patient's culture, or community. [IF THE RESPONDENT  
33 DOES NOT UNDERSTAND: *This statement means that you think the doctors*  
34 *are being nosy when they ask many questions about a patient's community*  
35 *or culture.*]  
36
- 37
- 38 • I'd rather have doctors and nurses make the decisions about what's best than  
39 for them to give me a whole lot of choices. [IF THE RESPONDENT DOES  
40 NOT UNDERSTAND: *This means that you prefer that the doctors decide*  
41 *without offering you choices.*]  
42
- 43
- 44 • It is best for parents if they do not have a full explanation of their child's  
45 medical condition  
46
- 47 • It is best for children if they do not have a full explanation of their medical  
48 condition  
49
- 50
- 51 • Parents should not try to find out about their conditions on their own, they  
52 should rely on their doctors' knowledge.  
53  
54  
55  
56  
57  
58  
59  
60

1  
2  
3 33. How comfortable do your doctors and other health professionals make you feel  
4 asking questions? *Choose one.*

- 5  Very comfortable  
6  Somewhat comfortable  
7  Not at all comfortable  
8  
9

10 34. How often do your doctors and other health professionals have open and honest  
11 communication with you? *Choose one.*

- 12  
13  Always  
14  Sometimes  
15  Never  
16  
17

18 35. How much do your doctors and other health professionals give you information and  
19 resources to help you make decisions about your child's care? *Choose one.*

- 20  A Great Deal  
21  Somewhat  
22  Not at all  
23  
24  
25

26 36. How well do your doctors and other health professionals talk with you about how to  
27 cope with any fears, stress, and other feelings? *Choose one.*

- 28  Very Well  
29  Fairly Well  
30  Poorly  
31  
32

33 37. How often do your doctors and other health professionals make sure you  
34 understand the steps in your child's care? *Choose one.*

- 35  Always  
36  Sometimes  
37  Never  
38  
39

40 38. How well do your doctors and other health professionals help you deal with the  
41 things nobody really knows about cancer? *Choose one.* [IF THE RESPONDENT DOES  
42 NOT UNDERSTAND ASK: *How well do the doctors help you manage for example, that*  
43 *you don't know if your child will respond to treatment, or if the cancer is going to come*  
44 *back?]*

- 45  Very Well  
46  Fairly Well  
47  Poorly  
48  
49  
50

51 39. How often do your doctors and other health professionals take into account your  
52 culture, background or religious beliefs when planning treatment for your child? *Choose*  
53 *one.*

- 54  Always  
55  Sometimes  
56  
57  
58  
59  
60

1  
2  
3  Never  
4

5  
6 40. When you ask questions, how often do you get answers that are understandable?  
7 *Choose one.*

- 8  Always  
9  Sometimes  
10  Never  
11

12  
13 41. Overall, how satisfied are you with the communication with your doctors and other  
14 health professionals? *Choose one.*

- 15  Very satisfied  
16  Fairly satisfied  
17  Not at all satisfied  
18  
19

20  
21 42. Is there anything else you would like us to know about your experiences with  
22 communication about your child's cancer care or diagnosis?  
23  
24  
25  
26  
27  
28  
29  
30  
31  
32  
33  
34  
35  
36  
37  
38  
39  
40  
41  
42  
43  
44  
45  
46  
47  
48  
49  
50  
51  
52  
53  
54  
55  
56  
57  
58  
59  
60

## 3. Codebook

| Topic                                           | Category                                                                                                                  | Code                                   | Definition                                                                                                                                                                                                                                                                                                             |
|-------------------------------------------------|---------------------------------------------------------------------------------------------------------------------------|----------------------------------------|------------------------------------------------------------------------------------------------------------------------------------------------------------------------------------------------------------------------------------------------------------------------------------------------------------------------|
| <b>Direction of conversation</b>                | <b>Clinician speaker</b>                                                                                                  | Oncologist to parent/family            | Clear that oncologist is speaking directly to the caregiver only.                                                                                                                                                                                                                                                      |
|                                                 |                                                                                                                           | Psychologist to parent/family          | Clear that psychologist is speaking directly to the caregiver only.                                                                                                                                                                                                                                                    |
| <b>Clinician patient-centered communication</b> | <b>Supportive talk:</b><br><i>Verbal behaviors that validate or support the patient's emotional or motivational state</i> | Verbal attentiveness                   | Showing understanding, paraphrasing, empathy, showing concern, worry, reassurance, optimism, legitimizing, respect, descriptions of inclusivity, validation. Include statements like "If you ever need anything come find me." "If you have more questions you can always ask" "It is my pleasure to help." "Cheer up" |
|                                                 | <b>Multidisciplinary approach</b>                                                                                         | Team care                              | Descriptions of clinicians working as a team to care for family. Does NOT include all general statements of "we" from providers.                                                                                                                                                                                       |
|                                                 | <b>Direct communication</b>                                                                                               | Honesty                                | Explicit references to honest or direct communication (e.g. "It is important that we are honest with you")                                                                                                                                                                                                             |
| <b>Decision making</b>                          | <b>Decision makers (who)</b><br><b>Using for both cancer related and non-cancer related decision</b>                      | Parents as joint decision makers       | Descriptions of two caregivers making decisions together as explicitly stated by caregiver                                                                                                                                                                                                                             |
|                                                 |                                                                                                                           | Parent as single decision maker        | Descriptions of one caregiver making decisions alone as explicitly stated by caregiver                                                                                                                                                                                                                                 |
|                                                 |                                                                                                                           | Extended decision maker                | Descriptions of decisions made that involve family beyond caregivers or community as explicitly stated by caregiver, includes God.                                                                                                                                                                                     |
|                                                 |                                                                                                                           | Child involved in decision making      | Descriptions of involving the child in decision making as explicitly stated by caregiver                                                                                                                                                                                                                               |
|                                                 |                                                                                                                           | Deference to provider                  | Explicit statements from caregivers that they prefer provider to make decision, or that they left decision up to provider, including statements that it is not their "role" to make such decisions                                                                                                                     |
|                                                 |                                                                                                                           | Team talk (parent)                     | References (made by caregivers) to decisions that were made together with medical team                                                                                                                                                                                                                                 |
|                                                 | <b>Decision making (what) (INT only)</b>                                                                                  | Decisions unrelated to cancer          | Descriptions of decision making (by family) that is not related to cancer or cancer treatment – only code in interview transcripts.                                                                                                                                                                                    |
|                                                 |                                                                                                                           | Cancer decisions                       | Descriptions of decision making (by family) related to child's cancer care – only code in interview transcripts                                                                                                                                                                                                        |
|                                                 | <b>Decision making (how)</b>                                                                                              | Team talk (provider): eliciting goals  | Provider elicits goals from caregiver to assist with decision making                                                                                                                                                                                                                                                   |
|                                                 |                                                                                                                           | Team talk (provider): offering choices | Provider offers options or choices to caregiver                                                                                                                                                                                                                                                                        |

|  |                                                                         |                                                                                                                 |                                                                                                                                                                                                                                                                                                                                                                             |
|--|-------------------------------------------------------------------------|-----------------------------------------------------------------------------------------------------------------|-----------------------------------------------------------------------------------------------------------------------------------------------------------------------------------------------------------------------------------------------------------------------------------------------------------------------------------------------------------------------------|
|  |                                                                         | Team talk (provider): family as part of the team                                                                | Provider discusses caregiver as part of the team making medical decisions (e.g. “we all make the decision together,” “We need your authorization to treat,” “If you agree...”). Does NOT include verbally attentive references such as “don’t worry we will explain...” OR “we will explain X to you”                                                                       |
|  |                                                                         | Option talk: discussion of risks                                                                                | Provider discussion of comparative risks or side effects of presented options                                                                                                                                                                                                                                                                                               |
|  |                                                                         | No-Option talk: discussion of risks                                                                             | Provider discussion of risks or side effects of one therapy without suggesting alternative                                                                                                                                                                                                                                                                                  |
|  |                                                                         | Option talk: discussion of benefits                                                                             | Provider discussion of comparative benefits of presented options                                                                                                                                                                                                                                                                                                            |
|  |                                                                         | No-Option talk: discussion of benefits                                                                          | Provider discussion of benefits of one therapy without suggesting alternative                                                                                                                                                                                                                                                                                               |
|  |                                                                         | Option talk: discussion of evidence                                                                             | Provider discussion of evidence base for presented options                                                                                                                                                                                                                                                                                                                  |
|  |                                                                         | No-Option talk: discussion of evidence                                                                          | Provider discussion of evidence base one therapy without suggesting alternative including explaining to the family why we are treating. E.g. “if he responds, we will give him ___” “we will do this if the first round of chemo works.”                                                                                                                                    |
|  |                                                                         | Decision talk: preference-based                                                                                 | Provider elicits informed preferences and asks caregiver to decide between choices or suggests a decision based on preferences or goals expressed by caregiver.                                                                                                                                                                                                             |
|  |                                                                         | Decision talk: Health promotion                                                                                 | Framing or nudging towards decision among choices                                                                                                                                                                                                                                                                                                                           |
|  |                                                                         | No-decision talk: Consequences                                                                                  | Provider describing potential consequences of NOT agreeing to recommended treatment plan.                                                                                                                                                                                                                                                                                   |
|  |                                                                         | No-decision talk: Giving decision                                                                               | Provider describes decision without options and without involving caregiver. Do NOT include hypothetical treatment decisions.                                                                                                                                                                                                                                               |
|  | <b>Decision making (why) MAY USE IN ALL TRANSCRIPTS, PARENT SPEAKER</b> | Family Factors- other children, financial influences                                                            | References to decisions that were made or complicated based on finances. Do NOT code all references to finances, just when they affect decision making.<br><br>References to decisions that were made or complicated by other children.                                                                                                                                     |
|  |                                                                         | Child’s best interest- symptoms/medical facts, quality of life concern, doing what is right/being a good parent | References to decisions that were made based on medical facts or the symptoms/condition of the child.<br><br>References to decisions that were made based on quality of life concern (e.g. so they can go to school, or be home with friends).<br><br>Decisions made because it is “the right thing to do” for the child or because it is what “a good caregiver should do” |
|  |                                                                         | Lack of agency- lack of choice, perceived threat, limited information                                           | Decisions that were made because it felt like the only option.<br><br>Decisions that were made because of fear.                                                                                                                                                                                                                                                             |

1  
2  
3  
4  
5  
6  
7  
8  
9  
10  
11  
12  
13  
14  
15  
16  
17  
18  
19  
20  
21  
22  
23  
24  
25  
26  
27  
28  
29  
30  
31  
32  
33  
34  
35  
36  
37  
38  
39  
40  
41  
42  
43  
44  
45  
46  
47  
48  
49  
50  
51  
52  
53  
54  
55  
56  
57  
58  
59  
60

|  |  |  |                                                                     |
|--|--|--|---------------------------------------------------------------------|
|  |  |  | Descriptions of lack of information as a barrier to decision making |
|--|--|--|---------------------------------------------------------------------|

For peer review only

# BMJ Open

## Cancer Treatment Decision-Making among Parents of Pediatric Oncology Patients in Guatemala

|                                 |                                                                                                                                                                                                                                                                                                                                                                                                                                                                                                                                                                                                                                                                                                                                                                                                                                                                 |
|---------------------------------|-----------------------------------------------------------------------------------------------------------------------------------------------------------------------------------------------------------------------------------------------------------------------------------------------------------------------------------------------------------------------------------------------------------------------------------------------------------------------------------------------------------------------------------------------------------------------------------------------------------------------------------------------------------------------------------------------------------------------------------------------------------------------------------------------------------------------------------------------------------------|
| Journal:                        | <i>BMJ Open</i>                                                                                                                                                                                                                                                                                                                                                                                                                                                                                                                                                                                                                                                                                                                                                                                                                                                 |
| Manuscript ID                   | bmjopen-2021-057350.R1                                                                                                                                                                                                                                                                                                                                                                                                                                                                                                                                                                                                                                                                                                                                                                                                                                          |
| Article Type:                   | Original research                                                                                                                                                                                                                                                                                                                                                                                                                                                                                                                                                                                                                                                                                                                                                                                                                                               |
| Date Submitted by the Author:   | 17-Mar-2022                                                                                                                                                                                                                                                                                                                                                                                                                                                                                                                                                                                                                                                                                                                                                                                                                                                     |
| Complete List of Authors:       | Graetz, Dylan; St Jude Children's Research Hospital<br>Rivas, Silvia; Unidad Nacional de Oncologia Pediatrica<br>Wang, Huiqi; Saint Jude Children's Research Hospital, Global Pediatric Medicine<br>Vedaraju, Yuvanesh; Saint Jude Children's Research Hospital, Global Pediatric Medicine<br>Ferrara, Gia; St Jude Children's Research Hospital<br>Fuentes, Lucia; Unidad Nacional de Oncologia Pediatrica, Psychology<br>Cáceres- Serrano, Ana; Unidad Nacional de Oncologia Pediatrica<br>Antillon-Klussmann, Federico; Unidad Nacional de Oncologia Pediatrica; Universidad Francisco Marroquin Facultad de Medicina<br>Devidas, Meenakshi; St Jude Children's Research Hospital<br>Metzger, Monika; Saint Jude Children's Research Hospital,<br>Rodriguez-Galindo, C; St Jude Children's Research Hospital<br>Mack, Jennifer; Dana-Farber Cancer Institute |
| <b>Primary Subject Heading</b>: | Global health                                                                                                                                                                                                                                                                                                                                                                                                                                                                                                                                                                                                                                                                                                                                                                                                                                                   |
| Secondary Subject Heading:      | Paediatrics, Oncology, Patient-centred medicine, Qualitative research                                                                                                                                                                                                                                                                                                                                                                                                                                                                                                                                                                                                                                                                                                                                                                                           |
| Keywords:                       | PAEDIATRICS, Paediatric oncology < ONCOLOGY, QUALITATIVE RESEARCH                                                                                                                                                                                                                                                                                                                                                                                                                                                                                                                                                                                                                                                                                                                                                                                               |
|                                 |                                                                                                                                                                                                                                                                                                                                                                                                                                                                                                                                                                                                                                                                                                                                                                                                                                                                 |

SCHOLARONE™  
Manuscripts



I, the Submitting Author has the right to grant and does grant on behalf of all authors of the Work (as defined in the below author licence), an exclusive licence and/or a non-exclusive licence for contributions from authors who are: i) UK Crown employees; ii) where BMJ has agreed a CC-BY licence shall apply, and/or iii) in accordance with the terms applicable for US Federal Government officers or employees acting as part of their official duties; on a worldwide, perpetual, irrevocable, royalty-free basis to BMJ Publishing Group Ltd ("BMJ") its licensees and where the relevant Journal is co-owned by BMJ to the co-owners of the Journal, to publish the Work in this journal and any other BMJ products and to exploit all rights, as set out in our [licence](#).

The Submitting Author accepts and understands that any supply made under these terms is made by BMJ to the Submitting Author unless you are acting as an employee on behalf of your employer or a postgraduate student of an affiliated institution which is paying any applicable article publishing charge ("APC") for Open Access articles. Where the Submitting Author wishes to make the Work available on an Open Access basis (and intends to pay the relevant APC), the terms of reuse of such Open Access shall be governed by a Creative Commons licence – details of these licences and which [Creative Commons](#) licence will apply to this Work are set out in our licence referred to above.

Other than as permitted in any relevant BMJ Author's Self Archiving Policies, I confirm this Work has not been accepted for publication elsewhere, is not being considered for publication elsewhere and does not duplicate material already published. I confirm all authors consent to publication of this Work and authorise the granting of this licence.



1  
2  
3 **Title:** Cancer Treatment Decision-Making among Parents of Pediatric Oncology Patients in  
4  
5 Guatemala  
6

7 **Running Head:** Decision-Making in Guatemala  
8

9 **Authors:** Dylan E. Graetz MD MPH<sup>a</sup>, Silvia Elena Rivas MD<sup>b</sup>, Huiqi Wang MS<sup>a</sup>, Yuvanesh  
10 Vedaraju MS<sup>a</sup>, Gia Ferrara MSGH<sup>a</sup>, Ana Lucia Fuentes<sup>b</sup>, Ana Caceres-Serrano PhD<sup>b</sup>, Federico  
11 Antillon-Klussmann MD PhD<sup>b,c</sup>, Meenakshi Devidas PhD, MBA<sup>a</sup>, Monika L. Metzger MD MS<sup>a</sup>,  
12 Carlos Rodriguez-Galindo MD<sup>a</sup>, Jennifer W. Mack MD MPH<sup>d</sup>  
13  
14  
15  
16  
17  
18

19 **Affiliations:**  
20

21 <sup>a</sup> St. Jude Children's Research Hospital, Memphis, Tennessee, USA  
22

23 <sup>b</sup> Unidad Nacional de Oncología Pediátrica, Guatemala City, Guatemala  
24

25 <sup>c</sup> Francisco Marroquin University School of Medicine, Guatemala City, Guatemala  
26

27 <sup>d</sup> Dana Farber Cancer Institute/Boston Children's Hospital, Boston, Massachusetts, USA  
28  
29

30 **Corresponding Author:** Dylan Graetz, St. Jude Children's Research Hospital, 262 Danny  
31 Thomas Place, Mailstop 721, Memphis TN 38105-3678; phone: 901 595-0763; email:  
32 [dylan.graetz@stjude.org](mailto:dylan.graetz@stjude.org)  
33  
34  
35  
36

37 **Funding source:** This work was funded by American Lebanese Syrian Associated Charities of  
38 St. Jude Children's Research Hospital and a Conquer Cancer Young Investigator Award (award  
39 number 17290). Any opinions, findings, and conclusions expressed in this material are those of  
40 the authors and do not necessarily reflect those of the American Society of Clinical Oncology or  
41 Conquer Cancer.  
42  
43  
44  
45  
46  
47

48 **Conflict of interest statement:** The authors have no conflicts of interest relevant to this article  
49 to disclose.  
50  
51  
52  
53  
54  
55  
56  
57  
58  
59  
60

1  
2  
3 **Contributorship statement:** Dr. Graetz conceptualized and designed the study and data  
4 collection tools, supervised pilot testing and data collection, analyzed qualitative data, drafted the  
5 initial manuscript, and reviewed and revised the manuscript.  
6  
7

8  
9  
10 Drs. Rivas and Antillon-Klussman contributed to study design, facilitated study approval and  
11 supervised data collection at Unidad Nacional Oncología Pediátrica, and reviewed and revised  
12 the manuscript.  
13  
14

15  
16 Ms. Wang, Mr. Vedaraju, and Dr. Devidas conducted statistical data analysis and reviewed and  
17 revised the manuscript.  
18  
19

20  
21 Ms. Ferrara analyzed the qualitative data and reviewed and revised the manuscript.  
22

23  
24 Ms. Fuentes and Ms. Caceres-Serrano contributed to study design, conducted pilot testing,  
25 collected data, and reviewed and revised the manuscript.  
26  
27

28  
29 Drs. Metzger and Rodriguez-Galindo contributed to study design and reviewed and revised the  
30 manuscript.  
31  
32

33  
34 Dr. Mack conceptualized and designed the study and data collection tools, and critically  
35 reviewed the manuscript for important intellectual content.  
36  
37

38  
39 All authors approved the final manuscript as submitted and agree to be accountable for all  
40 aspects of the work.  
41

42  
43 **Abbreviations:** LMICs: low- and middle-income countries; UNOP: Unidad Nacional de  
44 Oncología Pediátrica; St. Jude: St. Jude Children's Research Hospital  
45

46  
47 **Acknowledgements:** The authors would like to thank psychologists Pilar Alvarado, Inés  
48 Ordoñez, Paulina Salazar and Debby Velleman for their efforts assisting in qualitative data  
49 collection, as well as child psychologists Ana Lucia Espinoza Asturias and Gabriela Maria  
50 Garcia Palencia for their efforts assisting in survey administration, and the entire *Medicina*  
51  
52  
53  
54  
55  
56  
57  
58  
59  
60

1  
2  
3 *Integral* team at Unidad Nacional de Oncología Pediátrica for supporting this work. We would  
4  
5 also like to thank the parent participants who made this study possible.  
6

7  
8 **Key words:** Pediatric cancer; Guatemala; Decision-Making; Communication  
9

10 **Total number of text pages:** 24; **Tables:** 4; **Figures:** 0; **Supporting files:** 1  
11  
12  
13  
14  
15  
16  
17  
18  
19  
20  
21  
22  
23  
24  
25  
26  
27  
28  
29  
30  
31  
32  
33  
34  
35  
36  
37  
38  
39  
40  
41  
42  
43  
44  
45  
46  
47  
48  
49  
50  
51  
52  
53  
54  
55  
56  
57  
58  
59  
60

## Abstract

**Objectives:** To examine treatment decision-making priorities and experiences among parents of children with cancer in Guatemala.

**Setting:** This study was conducted at Guatemala's national pediatric cancer center in Guatemala City.

**Participants:** Spanish speaking parents of pediatric patients ( $\leq 18$  years of age) diagnosed with any form of cancer within the 8 weeks prior to study enrollment. The quantitative portion of this study included 100 parent participants; the qualitative component included 20 parents. Most participants were Catholic or Evangelical Spanish-speaking mothers.

**Outcomes:** Priorities and experiences of cancer treatment decision-making including decision-making role and experienced regret.

**Results:** A range of pediatric ages and cancer diagnoses were included. Most Guatemalan parents surveyed (70%) made decisions about their child's cancer together and almost all (94%) without input from their community. Surveyed parents predominately preferred shared decision-making with their child's oncologist (76%), however 69% agreed it was best not to be provided with many options. Two-thirds of surveyed parents (65%) held their preferred role in decision-making, with fathers more likely to hold their preferred role than mothers ( $p=0.02$ ). A small number of parents (11%) experienced heightened decisional regret, which did not correlate with sociodemographic characteristics or preferred decision-making role. Qualitative results supported quantitative findings, demonstrating a decision-making process that emphasized trust and honesty.

**Conclusions:** Guatemalan parents preferred to make decisions with their medical team and appreciated providers who were honest and inclusive, but directive about decisions. This study

1  
2  
3 reinforces the importance of the provider-parent relationship and encourages clinicians in all  
4  
5 settings to ask about and honor each parent's desired role in decision-making.  
6  
7  
8  
9

## 10 **Article Summary:**

### 11 Strengths and limitations of this study:

- 14 • This study investigated communication and decision-making, key components of patient-  
15 centered care, in a middle-income country, a previously understudied area of research in  
16 this population.  
17
- 18 • The convergent mixed-methods study design enabled broad assessment of decision-  
19 making priorities as well as deep exploration of decision-making processes among  
20 Guatemalan parents of children with cancer.  
21
- 22 • Use of survey items previously validated in high-income countries allowed for  
23 comparison to published literature from these settings.  
24
- 25 • The focus on the diagnostic period limited the ability to consider how decision-making  
26 may change over the cancer continuum.  
27
- 28 • Study was conducted at single cancer center in one middle-income country, and thus  
29 results may not apply to other low- and middle-income countries  
30  
31  
32  
33  
34  
35  
36  
37  
38  
39  
40  
41  
42  
43  
44

45 **Data sharing statement:** Extra data is available upon reasonable request by emailing the  
46  
47 corresponding author.  
48  
49  
50  
51  
52  
53  
54  
55  
56  
57  
58  
59  
60

## Key Questions:

### What is already known?

- Parents of children with cancer are faced with difficult decisions regarding care and treatment.
- In high-income Western contexts, shared decision-making is associated with improved outcomes, but little is known about decision-making in low- and middle-income countries, where 90% of children with cancer live.

### What are the new findings?

- This mixed-methods study included 120 Guatemalan parents of children with cancer and demonstrated that most parents prefer to make cancer decisions with their child's oncologist (76%), and most (65%) held their preferred role in decision-making, while few (11%) experienced decisional regret.
- Qualitative data demonstrates how culture may influence models for shared decision-making.

### What do the new findings imply?

- Guatemalan parents have many of the same priorities for cancer decision-making as parents of children in the United States and face similar challenges.
- These results reinforce the importance of the provider-parent relationship in all settings and encouraging cultural sensitivity.

## Introduction

From the time of diagnosis, parents of children with cancer are faced with difficult decisions regarding care and treatment. Shared decision-making is associated with improved patient-reported outcomes for adult cancer patients,<sup>1</sup> and research from high-income Western countries has emphasized a similar model for parents of children with cancer.<sup>2,3</sup> Effective shared decision-making depends on high-quality communication<sup>4</sup> through which pediatric oncology providers explore parents' goals of care as they present treatment options and determine a mutually acceptable action plan.

Parental values affect the extent to which they desire to be involved in decision-making, and both individual as well as community belief systems are shaped by culture. Cultural differences between patients and healthcare providers during decision-making have been demonstrated to result in erroneous assumptions and interpersonal conflict.<sup>4</sup> For parents of children with cancer, having their preferred role in decision making may increase trust in healthcare providers<sup>5</sup> and decrease regret.<sup>3,6</sup> Nevertheless, culture is rarely accounted for in research surrounding patient-provider communication and decision-making,<sup>7</sup> and very few studies have explored decision-making among pediatric cancer patients in low- and middle-income countries,<sup>8</sup> where >90% of children with cancer live.<sup>9</sup> The purpose of this mixed-methods study was to examine cancer treatment decision-making among parents of children with cancer in Guatemala at the time of diagnosis. Guatemala is a small but culturally diverse country; with 40% of the population comprised of 24 distinct ethnic groups who speak >20 different languages. We sought to assess the decision-making preferences and experiences of parents of children with cancer through a

1  
2  
3 cross-sectional survey and used audio-recorded diagnostic conversations and semi-structured  
4  
5 interviews to explore decision-making processes and influences in greater depth, including who  
6  
7 was involved in the process, how cancer treatment decisions were made, and parental reflections  
8  
9 on early decisions.  
10  
11  
12  
13

## 14 **Methods**

15  
16  
17  
18  
19 This study utilized a convergent mixed-methods design. Quantitative data was collected from a  
20  
21 verbally administered cross-sectional survey. Qualitative data included diagnostic conversations  
22  
23 between healthcare providers and parents of newly diagnosed children with cancer, and  
24  
25 subsequent semi-structured interviews.  
26  
27  
28  
29  
30

### 31 Participants and setting

32  
33  
34  
35 This study was conducted at Guatemala's national pediatric cancer center: Unidad Nacional de  
36  
37 Oncología Pediátrica (UNOP). UNOP is located in Guatemala City, Guatemala. Approximately  
38  
39 500 new cases of childhood cancer are diagnosed at UNOP annually, and the survival rate at  
40  
41 UNOP is about 67%.<sup>10</sup>  
42  
43  
44  
45  
46

47 Eligibility criteria for the quantitative sample and qualitative sample were the same and included  
48  
49 Spanish speaking parents of pediatric patients ( $\leq 18$  years of age) diagnosed with any form of  
50  
51 cancer within the past 8 weeks. Both components of the study were conducted in the outpatient  
52  
53 psychology and oncology clinics at UNOP. Parents participated in either the quantitative or  
54  
55  
56  
57  
58  
59  
60



1  
2  
3 qualitative portion of the study, but not both. Of 104 parents approached for the quantitative  
4 sample, 100 (96%) agreed to participate. Participants in the qualitative sample were recruited  
5 sequentially, with additional purposive sampling<sup>11</sup> to ensure representation of a range of  
6 pediatric ages and diagnoses as well as families with diverse socioeconomic and cultural  
7 backgrounds. Overall, 32 parents were approached for participation in the qualitative study and  
8 20 parents agreed to participate. Thematic saturation<sup>12</sup> was reached after enrollment of 20 parents  
9 and no further participants were approached.  
10  
11  
12  
13  
14  
15  
16  
17  
18  
19  
20

### 21 Ethics approval

22  
23  
24  
25  
26 Written informed consent was obtained in Spanish by a native Spanish speaker for all  
27 participants. This study was performed in compliance with international regulations for  
28 protection of human subjects and approved by institutional review boards (IRBs) and ethics  
29 committees at St. Jude and UNOP (IRB Number: 19-0162; Reference Number: 010262).  
30  
31  
32  
33  
34  
35  
36  
37

### 38 Study design and data collection

39  
40  
41  
42 For the quantitative component of the study, a cross-sectional survey was developed using items  
43 previously used in high-income countries<sup>5,6,13</sup> as well as novel questions specific to the study  
44 population. The survey was developed in English, translated into Spanish, pilot tested with 23  
45 parents to establish face and content validity through iterative revision, and back translated into  
46 English to ensure the original intent of questions was preserved.  
47  
48  
49  
50  
51  
52  
53  
54  
55  
56  
57  
58  
59  
60

1  
2  
3 *Sociodemographic information* was obtained through survey questions on participant's gender,  
4 relationship to the child, languages spoken, religion, ethnicity, household income, and marital  
5 status. Demographic information on patients including gender, age, and diagnosis was obtained  
6 from medical record review.  
7  
8  
9  
10

11  
12  
13  
14 *Decision making preferences and experiences* were assessed through the survey, first by asking  
15 parents "Who do you consider to be the person who makes most decisions in your house in  
16 general?", and "about your child's cancer treatment?". Response options included "Another  
17 parent or family member makes most of the decisions", "I am the parent most involved in  
18 making decisions" and, "I share decision-making equally with my child's other parent or family  
19 member". Parents were asked: "Which statement best describes the role your community played  
20 in helping you make decisions?". Response options included: "I/We made decisions about  
21 treatment without input from my community", "...with help from members or leaders in my  
22 community", and "My community, or a leader in my community, made the decision and told me  
23 what was best". A similar question asked about involvement of religious or spiritual leaders in  
24 decision-making.  
25  
26  
27  
28  
29  
30  
31  
32  
33  
34  
35  
36  
37  
38  
39  
40  
41

42 Regarding decision-making with the child's oncologist, parents were asked to describe "the role  
43 you would prefer to play when decisions about treatment for your child's cancer are made".  
44

45 Response options included: "I prefer that my child's oncologist and I make the decisions  
46 together", "I prefer that my child's oncologist make most of the decisions", or "I prefer to make  
47 the decisions about treatment". Parents were then asked about "the role you actually played when  
48 making decisions about treatment for your child's cancer", with similar response options framed  
49  
50  
51  
52  
53  
54  
55  
56  
57  
58  
59  
60

1  
2  
3 in the past tense. To further assess preferences for shared decision-making, parents were asked  
4  
5 “How much do you agree with the following statement: I’d rather have doctors and nurses make  
6  
7 the decisions about what’s best than for them to give me a whole lot of choices”. Response  
8  
9 options included: “strongly agree”, “slightly agree”, and “disagree”. Parents were also asked “At  
10  
11 the time of diagnosis, which of the following statements best describes how your oncologist  
12  
13 explained your child’s treatment plan”, with response options including “He/she gave me  
14  
15 different options and I chose what was best”, “He/she gave me different options and he/she told  
16  
17 me what was best”, and “He/she gave me only one option”.

18  
19  
20  
21  
22  
23  
24 Decisional regret was assessed using a modified version of the Decisional Regret Scale,<sup>14,15</sup>  
25  
26 which asked participants to state whether they “strongly agreed”, “slightly agreed”, or  
27  
28 “disagreed” with each of the following statements: “I have made the right decisions”, “I regret  
29  
30 the choices that were made”, “I would make the same choices if I had to do it all over again”,  
31  
32 “The decisions were wise”, and “The choices did my child a lot of harm”.

33  
34  
35  
36  
37  
38 The qualitative component of the study involved three audio-recorded sessions for each  
39  
40 participating family (60 sessions total). At UNOP, the standard diagnostic procedure includes an  
41  
42 intake conversation with a psychologist, followed by an initial diagnostic conversation with the  
43  
44 oncologist about diagnosis and treatment plans for which the psychologist is also present. These  
45  
46 two conversations were audio recorded as they naturally occurred, and one parent from each  
47  
48 participating family was subsequently interviewed. Semi-structured interviews explored parents’  
49  
50 communication perspectives and experiences, including the process for decision-making at  
51  
52 UNOP and parental reflections. All audio recordings were professionally transcribed and  
53  
54  
55  
56  
57  
58  
59  
60

1  
2  
3 translated into English with review by bilingual members of the research team to ensure adequate  
4 capture of original content.  
5  
6  
7  
8  
9

10 Complete survey and interview script are included as **supplementary materials**.  
11  
12  
13

#### 14 Data analysis

15  
16  
17  
18  
19 Quantitative data including sociodemographic information and items pertaining to decision-  
20 making were analyzed descriptively. Proportions between groups were compared using Chi-  
21 square or Fisher's exact test as appropriate. Parent responses regarding their preferred decision-  
22 making role was compared to the actual role they played. Parents whose preferences matched  
23 their experiences were considered to have held their preferred role and were compared to parents  
24 whose experiences did not match their preferences. Univariate logistic regression was used to  
25 assess the impact of sociodemographic characteristics on "preferred" versus "non-preferred" role  
26 in decision-making. A decisional regret score was calculated based on previously reported  
27 methods.<sup>15</sup> Because our final scale used 3 rather than 5 response options based on findings  
28 during pilot testing ("disagree", "slightly agree", "strongly agree"), points were assigned with a  
29 scale of 1, 3, and 5 with reverse scoring where appropriate, in which a score of 1 indicated the  
30 least regret and 5 indicated the most regret. Scores were decreased by 1 point and multiplied by  
31 25 for a score range of 0 to 100. Consistent with existing literature,<sup>15</sup> scores of 0 were  
32 categorized as no regret, 1-25 as mild regret, and >25 as heightened regret. Univariate logistic  
33 regression was performed with sociodemographic variables as well as "preferred" versus "non-  
34 preferred" role in decision-making.  
35  
36  
37  
38  
39  
40  
41  
42  
43  
44  
45  
46  
47  
48  
49  
50  
51  
52  
53  
54  
55  
56  
57  
58  
59  
60

1  
2  
3  
4  
5  
6 Analysis of qualitative data was conducted by two independent coders who conducted thematic  
7  
8 content analysis<sup>16</sup> on all transcripts utilizing a combination of *a priori*<sup>17,18</sup> and novel codes.  
9  
10 Interrater reliability ranged from 0.72-0.88. Novel codes were identified based on recurrent  
11  
12 themes by two authors who iteratively read transcripts. Conceptual definitions were refined  
13  
14 through memo writing and initial coding of 12 transcripts. The final codebook is included as  
15  
16 **supplementary material**. Codes related to decision-making included those identifying the  
17  
18 decision-maker, the type of decision, and the reasons behind decision-making. Codes related to  
19  
20 shared decision making at the cancer center included those expressed by providers and  
21  
22 reflections from parents. MAXQDA (VERBI, Berlin, Germany) was utilized for data  
23  
24 management. The Consolidated Criteria for Reporting Qualitative Studies guidelines were  
25  
26 followed.<sup>19</sup>  
27  
28  
29  
30  
31  
32

### 33 Patient and public involvement

34  
35  
36  
37 Neither patients, parents, nor the public were involved in the design of this research. Parents  
38  
39 were involved in piloting the survey and we plan to involve parents further as we disseminate  
40  
41 these results and consider interventional work.  
42  
43  
44  
45  
46

## 47 **Results**

### 48 49 50 51 Participant Characteristics

1  
2  
3 Demographic characteristics of participants from each sample and their children are included in  
4  
5 Table 1. Most included participants in both samples were Spanish-speaking mothers who  
6  
7 identified as either Catholic or Evangelical. A range of pediatric ages and cancer diagnoses were  
8  
9 included.  
10

### 11 12 13 14 15 Parental decision-making

16  
17  
18  
19 Most Guatemalan parents surveyed (80%) made household decisions with the child's other  
20  
21 parent, and 70% made decisions about their child's cancer care this way. In interviews, parents  
22  
23 described sharing decision-making with their partners. One father of an 18-month-old with  
24  
25 leukemia said, *"I talk to my wife and we agree on a middle point...the decisions are made by my*  
26  
27 *wife and me"*; a mother of a 6-year-old with leukemia similarly described how she made  
28  
29 decisions *"with my husband, because we are a couple"*. While many interviewed parents  
30  
31 listened to advice from extended family or community members, they emphasized the parental  
32  
33 unit as the ultimate decision maker: *"We have to talk, ask people with experience, and then we*  
34  
35 *decide"* (father of a 17-year-old with Hodgkin Lymphoma). Amongst surveyed parents, almost  
36  
37 all (94%) reported making decisions without input from their community, and most (76%) made  
38  
39 decisions without input from religious or spiritual leaders.  
40  
41  
42  
43  
44  
45  
46

47 In describing how they ultimately made decisions around cancer care and treatment during  
48  
49 interviews, parents prioritized the health and survival of their children. One parent said, *"For the*  
50  
51 *sake of my baby, we're going to do everything in our power to cure her"* (mother of a 10-year-  
52  
53 old with leukemia). Other parents described sacrifices they were making, or were willing to  
54  
55  
56  
57  
58  
59  
60

1  
2  
3 make, in order to get their child appropriate care: *“If I must give her my heart, my kidney, I’d*  
4 *give it to her so she won’t die. I already lived; she’s starting to live. I tell her if I must die for you*  
5 *to be cured, I’ll do it”*(father of a 17-year-old with glioblastoma).  
6  
7  
8  
9

### 10 11 12 Decision-making with the oncologist 13

14  
15  
16  
17 When asked about their preferred role in decision-making with respect to the oncologist, most  
18  
19 Guatemalan parents (76% of those surveyed) wanted to share decision-making with their child’s  
20  
21 oncologist. Of those that did not, 20% preferred that the oncologist made most of the decisions,  
22  
23 while 4% preferred to make treatment decisions themselves. However, a majority of parents  
24  
25 either slightly (21%) or strongly (47%) agreed that they would rather have their medical team  
26  
27 make decisions about what was best than provide a lot of choices; 31% disagreed. When asked  
28  
29 about their experiences during the decision-making process, only a few surveyed parents (4%)  
30  
31 said the oncologist provided them with options and they chose; the rest reported that they were  
32  
33 either given options and said the oncologist told them which was best (48%) or were not  
34  
35 provided options (48%).  
36  
37  
38  
39  
40  
41

42  
43 Qualitative data reflected a model of decision-making that emphasized honesty and trust in the  
44  
45 medical team. Psychologists set the tone during initial conversations, highlighting a team  
46  
47 approach to care and including parents as part of this team. One psychologist said to the parents  
48  
49 of a 5-year-old with leukemia: *“I know it’s hard to trust in strangers, but you can ask all*  
50  
51 *mothers here at the hospital, we are a team along with the parents...we don’t hide information.”*  
52  
53  
54 Another emphasized honesty, as she spoke to the parents of an 18-month-old newly diagnosed  
55  
56  
57  
58  
59  
60

1  
2  
3 with leukemia, saying, “*we will always tell you the truth, even if the truth is hard.*” These  
4  
5 messages were reinforced almost verbatim in diagnostic conversations with the oncologists: “*We*  
6  
7 *promise we will always tell you the truth. Even if the information is bad, we will tell you, we will*  
8  
9 *never hide information*” (oncologist to the same parents).  
10  
11

12  
13  
14 However, when psychologists and oncologists talked about treatment, they emphasized the  
15  
16 importance of starting immediately, using words like “*must*” and phrases such as “*have to*”,  
17  
18 without providing parents with multiple options. These directives referred to treatment  
19  
20 modalities, such as surgery or chemotherapy, necessity of hospitalization, and importance of  
21  
22 follow-up appointments. Table 2 includes additional quotations that demonstrate the tone around  
23  
24 decision-making set by psychologists and oncologists at UNOP.  
25  
26  
27  
28  
29

30  
31 Guatemalan parents accepted this model, expressing trust in their medical teams and deference to  
32  
33 their providers. A mother of a 16-year-old newly diagnosed with leukemia directly told the  
34  
35 oncologist, “*Whatever you say, you decide*”. Another parent described in an interview: “*We*  
36  
37 *didn't know if it was the best, but that's like when you wear an outfit – I just wear it – it doesn't*  
38  
39 *matter if it's pretty or not*” (father of an 18-month-old with leukemia). Parents also referred to  
40  
41 the expertise of their medical team, one saying, “*the best specialists are here, this is why I'm*  
42  
43 *here*” (father of a 17-year-old with osteosarcoma) and another, “*I didn't ask much; the experts*  
44  
45 *know the solution*”(father of a 4-year-old with leukemia).  
46  
47  
48  
49  
50

### 51 Reflections on decision-making

52  
53  
54  
55  
56  
57  
58  
59  
60



1  
2  
3 Two-thirds of surveyed parents (65%) held their preferred role in decision-making around their  
4 child's cancer care, while 23% had a more active role than desired and 11% had a less active role  
5 than desired. Fathers were more likely to hold their preferred role in decision-making than  
6 mothers (OR 4.32 [95% CI 1.17-15.89],  $p=0.02$ ) (Table 3).  
7  
8  
9

10  
11  
12  
13  
14 Most parents (64%) were categorized as having no decisional regret, while 25% had mild regret,  
15 and 11% had heightened regret. Heightened decisional regret did not significantly correlate with  
16 any sociodemographic variables, or with parents having played their preferred role in decision  
17 making (OR 1.34 [95% CI 0.32-5.56,  $p=0.68$ ) (Table 4). Parents in the qualitative sample  
18 predominantly expressed gratitude ("*we are grateful for this treatment*"(mother of a 5-year-old  
19 with leukemia)), peace ("*I'm a little bit more calmed*" (mother of a 5-year-old with leukemia);  
20 "*here we feel more relaxed*"(father of a 4-year-old with leukemia)), and relief ("*They told me*  
21 "*this was a good hospital; I felt relief*"(father of an 18-month-old with leukemia)) as they  
22 reflected on decisions they had made.  
23  
24  
25  
26  
27  
28  
29  
30  
31  
32  
33  
34  
35  
36  
37

## 38 Discussion

39  
40  
41  
42 The majority of Guatemalan parents included in this study valued shared decision-making, both  
43 with the child's other parent and with their child's oncologist. Providers at UNOP emphasized a  
44 decision-making model in which trust and honesty were prioritized. Parents deferred to their  
45 providers and were predominantly satisfied with the care they received. Ultimately, most parents  
46 felt they had made the right decisions, however, 11% experienced heightened decisional regret.  
47  
48  
49  
50  
51  
52  
53  
54  
55  
56  
57  
58  
59  
60

1  
2  
3 There are many approaches to decision-making in pediatric cancer care.<sup>20</sup> In high-income  
4  
5 Western contexts, shared decision-making has been prioritized.<sup>21</sup> While different definitions of  
6  
7 shared decision-making exist, it is often presented in contrast to paternalism and generally  
8  
9 emphasizes autonomy,<sup>22</sup> multiple options,<sup>23</sup> and two-way information-exchange.<sup>24</sup>  
10  
11 Approximately three out of every four Guatemalan parents in our study reported that they  
12  
13 preferred to share decision-making with their oncologists, however a similar proportion (69%)  
14  
15 ultimately wanted their medical team to decide what was best rather than provide multiple  
16  
17 options without a clear recommendation. These preferences are consistent with the decision-  
18  
19 making process noted in diagnostic conversations recorded at UNOP, after which most parents  
20  
21 expressed satisfaction. The model of decision-making at UNOP prioritizes trust, honesty, and  
22  
23 information-exchange but maintains a predominately unidirectional flow of information  
24  
25 (provider to parent) and does not include many choices. This model diverges from expectations  
26  
27 for shared decision-making set forth by literature from high-income countries but is consistent  
28  
29 with literature from other LMICs which describes an evolution in medical decision-making<sup>25</sup>  
30  
31 with increasing prioritization of information-exchange<sup>26</sup> and autonomy over time.<sup>27</sup> These  
32  
33 findings suggest there may be differences in cultural perceptions around shared decision-making,  
34  
35 and shared decision-making may have different manifestations in different contexts.  
36  
37  
38  
39  
40  
41  
42  
43  
44

45 Parents in our study also predominantly reported sharing decisions about their child's care with  
46  
47 the child's other parent, without significant input from their community. While there is limited  
48  
49 literature on extended family or community involvement in decision-making for children with  
50  
51 cancer, one study conducted in the UK demonstrated decisions were primarily made without  
52  
53 involvement of individuals outside the nuclear family,<sup>28</sup> consistent with our findings from  
54  
55  
56  
57  
58  
59  
60

1  
2  
3 Guatemala. However, approximately a quarter of parent participants in our study did describe  
4 consulting spiritual or religious advisors, emphasizing the importance of religion to this  
5 community. Previous work also suggests that although diagnosis is a one of the most stressful  
6 times for parents of children with cancer, it is a time when parents may feel most connected to  
7 one another.<sup>29</sup> It is possible that this emotional connection explains the shared parental decision-  
8 making we noted among partnered participants. However, it is also possible that sociocultural  
9 expectations, including patriarchal pressure, may influence decision-making in Guatemala. This  
10 study included more mothers than fathers, which is representative of caregivers at UNOP where  
11 mothers often attend visits while fathers remain in the community, working to support the  
12 family. Mothers at UNOP may feel obligated to discuss decisions about their child's care with  
13 the child's father, whose opinions carry more weight. In addition, we found that mothers were  
14 less likely than fathers to have their desired role in decision-making. While the percentage of  
15 parents (approximately one-third) who did not have their preferred role in decision-making is  
16 nearly identical to that seen in high-income countries, parents in Guatemala who did not have  
17 their desired decision-making role tended to have a more active role than desired, whereas those  
18 in the United States tended to have a more passive role than desired.<sup>30</sup> The desire of parents, and  
19 particularly mothers, to play a more passive role in decision-making may reflect cultural  
20 disempowerment, a theme that has been previously described in pediatric cancer communication  
21 in LMICs.<sup>31,32</sup>

22  
23  
24  
25  
26  
27  
28  
29  
30  
31  
32  
33  
34  
35  
36  
37  
38  
39  
40  
41  
42  
43  
44  
45  
46  
47  
48  
49 Finally, parents included in this study report being primarily motivated by their child's health  
50 and well-being. This is consistent with the "good-parent" belief,<sup>33</sup> a concept which has been  
51 extensively studied in high-income settings<sup>34</sup> and includes "unselfish decisions in the child's best  
52  
53  
54  
55  
56  
57  
58  
59  
60

1  
2  
3 interest".<sup>33</sup> Most parents were satisfied with their decisions, however the small but relevant  
4  
5 number of parents (11%) who experienced heightened decisional regret emphasizes the weight of  
6  
7 cancer-related decisions and the importance of ongoing support. These findings reinforce the  
8  
9 importance of exploring parental preferences for cancer communication and prioritizing  
10  
11 individual familial needs, which may or may not be influenced by culture.  
12  
13  
14  
15  
16

17 This mixed-methods study allowed us to evaluate decision-making among Guatemalan parents  
18  
19 of children with cancer, including a deep exploration of motivating factors and the decision-  
20  
21 making process at UNOP. However, there are several limitations that should be considered. To  
22  
23 reduce burden on participants, our study design included separate qualitative and quantitative  
24  
25 samples which limited convergent analysis. This study focused specifically on decision-making  
26  
27 at diagnosis, and thus does not address potential shifts in decision-making preferences or  
28  
29 experiences over the cancer care continuum. In addition, this study was conducted at a single  
30  
31 cancer center in one small middle-income country. This was an initial step toward exploring  
32  
33 diagnostic communication and decision-making in LMICs and allowed for comparison to  
34  
35 literature from high-income settings, but further research is needed to determine if these findings  
36  
37 are applicable beyond Guatemala. Moreover, Guatemala itself is a diverse country. Our study  
38  
39 was conducted exclusively in Spanish and thus we were unable to include parents who were not  
40  
41 proficient in Spanish. Finally, because most parents included in our study had positive reflections  
42  
43 on their decisions, we were limited in our ability to analyze the small proportion of parents who  
44  
45 did experience regret. This is an opportunity for future research.  
46  
47  
48  
49  
50  
51  
52  
53

#### 54 Conclusion:

55  
56  
57  
58  
59  
60

1  
2  
3  
4  
5 Almost all prior work on decision-making in pediatric cancer care has been conducted  
6  
7 exclusively in high-income settings including the United States and Europe.<sup>35</sup> This study  
8  
9 demonstrates that many parents in Guatemala, like those in the United States, want to be engaged  
10  
11 in decision-making by their oncology teams and prioritize their child's well-being. However,  
12  
13 shared-decision making manifests differently in the Guatemalan context and differs from  
14  
15 previous definitions, most of which come from high-resourced settings. These findings suggest  
16  
17 ways in which culture may influence priorities for communication and care. Ultimately, this  
18  
19 work further supports developing the provider-parent relationship in all settings by encouraging  
20  
21 clinicians to routinely ask parents what role they want to play in decision-making and honor their  
22  
23 responses.  
24  
25  
26  
27  
28  
29  
30  
31  
32  
33  
34  
35  
36  
37  
38  
39  
40  
41  
42  
43  
44  
45  
46  
47  
48  
49  
50  
51  
52  
53  
54  
55  
56  
57  
58  
59  
60

## References

1. Kehl KL, Landrum MB, Arora NK, et al. Association of actual and preferred decision roles with patient-reported quality of care: Shared decision making in cancer care. *JAMA Oncology*. 2015;1(1):50-58. doi:10.1001/jamaoncol.2014.112
2. Hinds PS, Oakes L, Furman W, et al. Decision making by parents and healthcare professionals when considering continued care for pediatric patients with cancer. *Oncology nursing forum*. 1997;24(9):1523-1528. Accessed June 7, 2021. <https://pubmed.ncbi.nlm.nih.gov/9348593/>
3. Sisk BA, Kang TI, Goldstein R, DuBois JM, Mack JW. Decisional burden among parents of children with cancer. *Cancer*. 2019;125(8):1365-1372. doi:10.1002/cncr.31939
4. Derrington SF, Paquette E, Johnson KA. Cross-cultural Interactions and Shared Decision-making. *Pediatrics*. 2018;142(Supplement 3):S187-S192. doi:10.1542/PEDS.2018-0516J
5. Mack JW, Wolfe J, Grier HE, Cleary PD, Weeks JC. Communication about prognosis between parents and physicians of children with cancer: Parent preferences and the impact of prognostic information. *Journal of Clinical Oncology*. 2006;24(33):5265-5270. doi:10.1200/JCO.2006.06.5326
6. Sisk BA, Kang TI, Mack JW. The evolution of regret: decision-making for parents of children with cancer. *Supportive Care in Cancer*. Published online June 20, 2019:1-8. doi:10.1007/s00520-019-04933-8
7. Charles C, Gafni A, Whelan T, O'Brien MA. Cultural influences on the physician-patient encounter: The case of shared treatment decision-making. *Patient Education and Counseling*. 2006;63(3):262-267. doi:10.1016/J.PEC.2006.06.018
8. Graetz DE, Garza M, Rodriguez-Galindo C, Mack JW. Pediatric cancer communication in low- and middle-income countries: A scoping review. *Cancer*. Published online September 29, 2020:cncr.33222. doi:10.1002/cncr.33222
9. Ward ZJ, Yeh JM, Bhakta N, Frazier AL, Atun R. Estimating the total incidence of global childhood cancer: a simulation-based analysis. *The Lancet Oncology*. 2019;20(4):483-493. doi:10.1016/S1470-2045(18)30909-4
10. Ribeiro RC, Antillon F, Pedrosa F, Pui CH. Global pediatric oncology: Lessons from partnerships between high-income countries and low- to mid-income countries. *Journal of Clinical Oncology*. 2016;34(1):53-61. doi:10.1200/JCO.2015.61.9148
11. Palinkas LA, Horwitz SM, Green CA, et al. Purposeful sampling for qualitative data collection and analysis in mixed method implementation research. *Administration and policy in mental health*. Published online 2015. doi:10.1007/s10488-013-0528-y.Purposeful
12. Saunders B, Sim J, Kingstone T, et al. Saturation in qualitative research: exploring its conceptualization and operationalization. *Quality and Quantity*. 2018;52(4):1893-1907. doi:10.1007/s11135-017-0574-8
13. Elwyn G, Edwards A, Wensing M, et al. *Shared Decision Making Measurement Using the OPTION Instrument*. Accessed September 19, 2018. [http://www.glynelwyn.com/uploads/2/4/0/4/24040341/option\\_12\\_book.pdf](http://www.glynelwyn.com/uploads/2/4/0/4/24040341/option_12_book.pdf)
14. Brehaut JC, O'connor AM, Wood TJ, et al. ARTICLE Validation of a Decision Regret Scale. doi:10.1177/0272989X03256005

15. Mack JW, Cronin AM, Kang TI. Decisional regret among parents of children with cancer. *Journal of Clinical Oncology*. 2016;34(33):4023-4029. doi:10.1200/JCO.2016.69.1634
16. Elo S, Kyngäs H. The qualitative content analysis process. *Journal of Advanced Nursing*. 2008;62(1):107-115. doi:10.1111/j.1365-2648.2007.04569.x
17. Roter D, Larson S. The Roter interaction analysis system (RIAS): Utility and flexibility for analysis of medical interactions. *Patient Education and Counseling*. 2002;46(4):243-251. doi:10.1016/S0738-3991(02)00012-5
18. Street RL. Article in Health Communication. Published online 2001. doi:10.1207/S15327027HC1301\_06
19. Tong A, Sainsbury P, Craig J. Consolidated criteria for reporting qualitative research (COREQ): a 32-item checklist for interviews and focus groups. *International Journal for Quality in Health Care*. 2007;19(6):349-357. doi:10.1093/intqhc/mzm042
20. Sung L, Regier DA. Decision making in pediatric oncology: Evaluation and incorporation of patient and parent preferences. *Pediatric Blood and Cancer*. 2013;60(4):558-563. doi:10.1002/pbc.24450
21. Mercurio MR, Forman EN, Ladd RE, Maxwell MA, Ross LF, Silber TJ. American academy of pediatrics policy statements on bioethics: Summaries and commentaries: Part 3. *Pediatrics in Review*. 2008;29(5). doi:10.1542/pir.29-5-e28
22. Elwyn G, Frosch D, Thomson R, et al. Shared Decision Making: A Model for Clinical Practice. *Journal of General Internal Medicine*. 2012;27(10):1361-1367. doi:10.1007/s11606-012-2077-6
23. Boland L, Graham ID, Légaré F, et al. Barriers and facilitators of pediatric shared decision-making: A systematic review. *Implementation Science*. 2019;14(1):1-25. doi:10.1186/s13012-018-0851-5
24. Charles C, Gafni A, Whelan T. Decision-making in the physician–patient encounter: revisiting the shared treatment decision-making model. *Social Science & Medicine*. 1999;49(5):651-661. doi:10.1016/S0277-9536(99)00145-8
25. Vučemilović M, Mahmić-Kaknjo M, Pavličević I. Transition from paternalism to shared decision making - a review of the educational environment in Bosnia and Herzegovina and Croatia. *Acta medica academica*. 2016;45(1):61-69. doi:10.5644/ama2006-124.157
26. Kilicarlsan-Toruner E, Akgun-Citak E. Information-seeking behaviours and decision-making process of parents of children with cancer. *European Journal of Oncology Nursing*. 2013;17(2):176-183. doi:10.1016/j.ejon.2012.03.001
27. Cicero-Oneto CE, Valdez-Martinez E, Bedolla M. Decision-making on therapeutic futility in Mexican adolescents with cancer: A qualitative study. *BMC Medical Ethics*. 2017;18(1). doi:10.1186/s12910-017-0231-8
28. McKENNA K, Blake H. Parental involvement in paediatric cancer treatment decisionse cc\_1116 621..630 Parental involvement in paediatric cancer treatment decisions. *European Journal of Cancer Care*. 2010;19:621-630. doi:10.1111/j.1365-2354.2009.01116.x
29. Wiener L, Battles H, Zadeh S, Pelletier W, Arruda-Colli M, Muriel A. The perceived influence of childhood cancer on the parents' relationship HHS Public Access. *Psychooncology*. 2017;26(12):2109-2117. doi:10.1002/pon.4313
30. Mack JW, Wolfe J, Cook EF, Grier HE, Cleary PD, Weeks JC. Parents' Roles in Decision Making for Children With Cancer in the First Year of Cancer Treatment. *Journal of Clinical Oncology*. 2011;29(15):2085-2090. doi:10.1200/JCO.2010.32.0507



- 1  
2  
3 31. Kohlsdorf M, Luiz Á, Junior C. Associations between clinical and sociodemographic data  
4 and patterns of communication in pediatric oncology. Published online 2016.  
5 doi:10.1186/s41155-016-0028-6  
6  
7 32. Renner LA, McGill D. Exploring factors influencing health-seeking decisions and  
8 retention in childhood cancer treatment programmes: perspectives of parents in Ghana.  
9 *Ghana medical journal*. 2016;50(3):149-156.  
10  
11 33. Hinds PS, Oakes LL, Hicks J, et al. “Trying to be a good parent” as defined by interviews  
12 with parents who made phase I, terminal care, and resuscitation decisions for their  
13 children. *Journal of Clinical Oncology*. 2009;27(35):5979-5985.  
14 doi:10.1200/JCO.2008.20.0204  
15  
16 34. Weaver MS, October T, October T, et al. “Good-Parent Beliefs”: Research, concept, and  
17 clinical practice. *Pediatrics*. 2020;145(6). doi:10.1542/peds.2019-4018  
18  
19 35. Sisk BA, Mack JW, Ashworth R, DuBois J. Communication in pediatric oncology: State  
20 of the field and research agenda. *Pediatric Blood & Cancer*. 2017;(June 2017):e26727.  
21 doi:10.1002/pbc.26727  
22  
23  
24  
25  
26  
27  
28  
29  
30  
31  
32  
33  
34  
35  
36  
37  
38  
39  
40  
41  
42  
43  
44  
45  
46  
47  
48  
49  
50  
51  
52  
53  
54  
55  
56  
57  
58  
59  
60



**Table 1. Sociodemographic characteristics of participating caregivers and their children**

|                                              | <b>Quantitative sample<br/>(total = 100)</b> | <b>Qualitative sample<br/>(total = 20)</b> |
|----------------------------------------------|----------------------------------------------|--------------------------------------------|
| <b>Participant</b>                           | <b>N (%)</b>                                 | <b>N (%)</b>                               |
| <b>Relationship to patient</b>               |                                              |                                            |
| Mother                                       | 76 (76%)                                     | 13 (65%)                                   |
| Father                                       | 22 (22%)                                     | 7 (35%)                                    |
| Grandparent                                  | 1 (1%)                                       | 0 (0%)                                     |
| Sibling                                      | 1 (1%)                                       | 0 (0%)                                     |
| <b>Gender</b>                                |                                              |                                            |
| Male                                         | 23 (23%)                                     | 7 (35%)                                    |
| Female                                       | 77 (77%)                                     | 13 (65%)                                   |
| <b>Primary language</b>                      |                                              |                                            |
| Spanish (only)                               | 73 (73%)                                     | 13 (65%)                                   |
| Spanish and English                          | 2 (2%)                                       | 0 (0%)                                     |
| Spanish and Mayan dialect                    | 24 (24%)                                     | 7 (35%)                                    |
| Mayan dialect (only)                         | 1 (1%)                                       | 0 (0%)                                     |
| <b>Ethnicity*</b>                            |                                              | Data not collected                         |
| Ladino                                       | 55 (56%)                                     |                                            |
| Indigenous (Mayan)                           | 25 (25%)                                     |                                            |
| Mixed race                                   | 19 (19%)                                     |                                            |
| <b>Religion</b>                              |                                              |                                            |
| Catholic                                     | 41 (41%)                                     | 4 (20%)                                    |
| Evangelical                                  | 52 (52%)                                     | 13 (65%)                                   |
| Other identified religion                    | 3 (3%)                                       | 2 (10%)                                    |
| No religion                                  | 4 (4%)                                       | 1 (5)                                      |
| <b>Civil status*</b>                         |                                              |                                            |
| Married                                      | 59 (60%)                                     | 13 (65%)                                   |
| United (living together as if married)       | 25 (25%)                                     | 6 (30%)                                    |
| Separated                                    | 1 (1%)                                       | 0 (0%)                                     |
| Divorced                                     | 10 (10%)                                     | 1 (5%)                                     |
| Single                                       | 4 (4%)                                       | 0 (0%)                                     |
| <b>Monthly household income (Quetzales)*</b> |                                              | Data not collected                         |
| <2000                                        | 36 (37%)                                     |                                            |
| 2000-2999                                    | 23 (23%)                                     |                                            |
| >2999                                        | 39 (40%)                                     |                                            |
| <b>Patient</b>                               |                                              |                                            |
| <b>Age (years)</b>                           |                                              |                                            |
| 0-5                                          | 38 (38%)                                     | 6 (30%)                                    |
| 6-10                                         | 19 (19%)                                     | 6 (30%)                                    |
| 11-15                                        | 31 (31%)                                     | 4 (20%)                                    |
| 16-18                                        | 12 (12%)                                     | 4 (20%)                                    |
| <b>Gender</b>                                |                                              |                                            |
| Male                                         | 61 (61%)                                     | 11 (55%)                                   |
| Female                                       | 39 (39%)                                     | 9 (45%)                                    |

| Diagnosis             |          |          |
|-----------------------|----------|----------|
| Leukemia              | 58 (58%) | 13 (65%) |
| Lymphoma              | 12 (12%) | 2 (10%)  |
| Histiocytic disorders | 2 (2%)   | 1 (5%)   |
| Solid tumor           | 25 (25%) | 3 (15%)  |
| Brain tumor           | 3 (3%)   | 1 (5%)   |

\* Ethnicity: 1 missing; Civil status: 1 missing; Monthly household income (Quetzales): 2 missing

For peer review only

**Table 2. Excerpts from recorded diagnostic conversations emphasizing teamwork and honesty over autonomy**

| Theme                 | Psychologists speaking to parents during intake                                                                                                                                                                                                                                                                                                                                                                                                                    | Oncologists speaking to parents in diagnostic conversations                                                                                                                                                                                                                                                                                                                                                                                                                                                                                 |
|-----------------------|--------------------------------------------------------------------------------------------------------------------------------------------------------------------------------------------------------------------------------------------------------------------------------------------------------------------------------------------------------------------------------------------------------------------------------------------------------------------|---------------------------------------------------------------------------------------------------------------------------------------------------------------------------------------------------------------------------------------------------------------------------------------------------------------------------------------------------------------------------------------------------------------------------------------------------------------------------------------------------------------------------------------------|
| <b>Teamwork</b>       | <p><i>“You see we are all a team.”</i> (to parents of an 18-month-old with leukemia)</p> <p><i>“I want you to know that we are a team and we will always tell the truth.”</i> (to parents of a 5-year-old with Wilms tumor)</p> <p><i>“In here, each doctor has his specialty...each of them in their own working area, but we are still a team.”</i> (to parents of a 5-year-old with leukemia)</p>                                                               | <p><i>“We want to remark that we are a team...and we are all here to support you. We are a big team so one of us will be ready to answer all your questions. No matter if it’s good or bad, you deserve to know it.”</i> (to parents of a 5-year-old with leukemia)</p> <p><i>“We are a lot of people that work for all children’s recovery...There’s a huge hope and you have the entire medical staff and the hospital staff next to you, working together to make [your son] better.”</i> (to parents of a 6-year-old with leukemia)</p> |
| <b>Honesty</b>        | <p><i>“We will be very honest with you; we won’t lie to you...Anything that comes up, I’ll let you know”</i> (to parents of a 5-year-old with Wilms tumor)</p> <p><i>“I know no one likes bad news, but as a parent you deserve the truth...Like I told you, doctors will be very honest with you.”</i> (to parents of a 17-year-old with glioblastoma)</p> <p><i>“Here, they will always tell you everything.”</i> (to parents of a 4-year-old with leukemia)</p> | <p><i>“Another important thing. We are always going to be very honest with you, if anything comes up, we will seat down with you and talk to you.”</i> (to parents of a 14-year-old with leukemia)</p> <p><i>“We won’t lie to you, of course it’s going to be hard, this is going to feel like a roller coaster, there will be good days and there will be hard days, but we will be with you on good days and hard days.”</i> (to parents of a 14-year-old with leukemia)</p>                                                              |
| <b>Lack of choice</b> | <p><i>“What we definitely have to do is surgery, that’s essential to cure this type of cancer.”</i> (to parents of a 3-year-old with Wilms)</p> <p><i>“Therefore, is so important that once we detect it, we must give treatment immediately.”</i> (to parents of a 5-year-old with leukemia)</p> <p><i>“With these, the only treatment is surgery...If we want to save [your</i></p>                                                                              | <p><i>“Unfortunately, he must stay here for now, but after a while he’ll be able to go home for some time or to the shelter.”</i> (to parents of a 4-year-old with leukemia)</p> <p><i>“It’s going to be difficult, because I’m not telling you it’s going to be easy or that don’t have to make sacrifices, but if you want to see [your daughter] cured, just like us, this is the road we must</i></p>                                                                                                                                   |

1  
2  
3  
4  
5  
6  
7  
8  
9  
10  
11  
12  
13  
14  
15  
16  
17  
18  
19  
20  
21  
22  
23  
24  
25  
26  
27  
28  
29  
30  
31  
32  
33  
34  
35  
36  
37  
38  
39  
40  
41  
42  
43  
44  
45  
46  
47  
48  
49  
50  
51  
52  
53  
54  
55  
56  
57  
58  
59  
60

|  |                                                                                               |                                                            |
|--|-----------------------------------------------------------------------------------------------|------------------------------------------------------------|
|  | <i>son], we must perform the surgery.”</i><br>(to parents of a 17-year-old with osteosarcoma) | <i>follow.”</i> (to parents of a 4-year-old with leukemia) |
|--|-----------------------------------------------------------------------------------------------|------------------------------------------------------------|

For peer review only

**Table 3. Univariate logistic regression analysis of sociodemographic factors and preferred decision-making role**

| <b>Decision-Making</b>                             |                |                     |
|----------------------------------------------------|----------------|---------------------|
| <b>Factor</b>                                      | <b>P-Value</b> | <b>Odds Ratio</b>   |
| <b>Parent (N=96)</b>                               | 0.02*          |                     |
| <b>Father</b>                                      |                | 4.32 (1.17 - 15.89) |
| <b>Mother</b>                                      |                | 1.00 (Ref)          |
| <b>Ethnicity (N=97)</b>                            | 0.70           |                     |
| <b>Ladino</b>                                      |                | 1.49 (0.51 - 4.36)  |
| <b>Indigenous (Mayan)</b>                          |                | 1.66 (0.47 - 5.93)  |
| <b>Mixed race</b>                                  |                | 1.00 (Ref)          |
| <b>Monthly household Income (Quetzales) (N=96)</b> | 0.60           |                     |
| <b>&lt;2000</b>                                    |                | 1.00 (Ref)          |
| <b>2000-2999</b>                                   |                | 1.43 (0.46 - 4.39 ) |
| <b>&gt;2999</b>                                    |                | 1.61 (0.62 - 4.15 ) |
| <b>Diagnosis group (N=98)</b>                      | 0.12           |                     |
| <b>Leukemia</b>                                    |                | 1.00 (Ref)          |
| <b>Lymphoma</b>                                    |                | 8.25 (1.00 - 68.35) |
| <b>Solid tumor</b>                                 |                | 1.59 (0.59 - 4.30)  |
| <b>Others (Histiocytic disorder + Brain tumor)</b> |                | 3.00 (0.31 - 28.59) |

\*significant p-value

**Table 4. Univariate logistic regression analysis of heightened decisional regret**

| <b>Decisional regret</b>                                             |                |                     |
|----------------------------------------------------------------------|----------------|---------------------|
| <b>Factor</b>                                                        | <b>P-Value</b> | <b>Odds Ratio</b>   |
| <b>Parent (N=98)</b>                                                 | 0.68           |                     |
| <b>Father</b>                                                        |                | 1.34 (0.32 - 5.56)  |
| <b>Mother</b>                                                        |                | 1.00 (Ref)          |
| <b>Ethnicity (N=99)</b>                                              | 0.16           |                     |
| <b>Ladino</b>                                                        |                | 1.41 (0.15 - 13.48) |
| <b>Indigenous (Mayan)</b>                                            |                | 4.50 (0.48 - 42.25) |
| <b>Mixed race</b>                                                    |                | 1.00 (Ref)          |
| <b>Monthly household Income (Quetzales) (N=98)</b>                   | 0.27           |                     |
| <b>&lt;2000</b>                                                      |                | 1.00 (Ref)          |
| <b>2000-2999</b>                                                     |                | 0.75 (0.17 - 3.35)  |
| <b>&gt;2999</b>                                                      |                | 0.27 (0.05 - 1.44)  |
| <b>Diagnosis group (N=100)</b>                                       | 0.57           |                     |
| <b>Leukemia</b>                                                      |                | 1.00 (Ref)          |
| <b>Lymphoma</b>                                                      |                | 0.57 (0.06 - 5.02)  |
| <b>Others<br/>(Brain tumor + Histiocytic disorder + Solid tumor)</b> |                | 0.45 (0.09 - 2.25)  |
| <b>Decision Engagement (N=98)</b>                                    | 0.71           |                     |
| <b>Preferred</b>                                                     |                | 0.78 (0.20 - 2.96)  |
| <b>Not preferred</b>                                                 |                | 1.00 (Ref)          |

## Supplemental Material

### Cancer Treatment Decision-Making among Parents of Pediatric Oncology Patients in Guatemala

Dylan E. Graetz MD MPH, Silvia Elena Rivas MD, Huiqi Wang MS, Yuvanesh Vedaraju MS, Gia Ferrara MSGH, Ana Lucia Fuentes, Ana Caceres-Serrano PhD, Federico Antillon-Klussmann MD PhD, Meenakshi Devidas PhD MBA, Monika L. Metzger MD MS, Carlos Rodriguez-Galindo MD, Jennifer W. Mack MD MPH

| Section         | Page  |
|-----------------|-------|
| Interview Guide | 2-3   |
| Survey          | 4-17  |
| Codebook        | 18-20 |

## 1. Interview Guide

1. Tell me about your experience at UNOP.
  - a. Who told you to come?... how did you get here?... when did you arrive?... What happened next...?
    - i. Where did you stay while your child was being diagnosed?
    - ii. Who came to the visits?
    - iii. Who visited you while you were here?
    - iv. Who did you meet with?
    - v. What testing was done?
2. Before your child was diagnosed, what did cancer mean to you? What had you heard about cancer?
  - a. Did you know anyone with cancer?
  - b. How do people in your community think about cancer?
  - c. Had you heard the word before? How did you first hear it/learn about it?
3. Tell me, did you go to another hospital or receive treatment anywhere before you came to UNOP?
  - a. If so, where?
  - b. What did they tell you about your child and his/her illness?
  - c. Did you try any medicines or remedies before coming to UNOP?
    - i. What happened with these?
4. At the time your child was diagnosed at UNOP, who explained cancer to you?
  - a. How did they explain it?
  - b. How was that similar to what you already understood/believed about cancer?
  - c. How was it different to what you understood/believed about cancer?
  - d. Did you talk to the team about these similarities/differences? Were all of your questions answered/addressed?
  - e. How does this relate to your other experiences with illness?
    - i. How is it similar/different?
5. What is your understanding of cancer now?
  - a. How did you reach this understanding?
  - b. Is this similar to or different from what your family thinks about cancer?
  - c. Is it similar to or different from what others in your community think about cancer?
  - d. Is it similar to or different from what the doctors and nurses think?
  - e. Do you still have questions or concerns?
6. Tell me about how you usually make important decisions in your family/community.
  - a. There are lots of decisions a family has to make, for example, some families have to make decisions about how to spend money or whether their children will work or go to school. Who is responsible for making decisions in your family?
    - i. Are there others who have input in decisions?
    - ii. What is your level of involvement in decisions? Would you say you are mostly responsible for decisions alone? Do you share that responsibility? With whom? Do you have more limited input?
  - b. How is this similar to or different from the way your family has made decisions about your child's cancer?
    - i. Who is responsible for coming to appointments with your child?
    - ii. How is information from those visits shared with others in your family? In your community?
    - iii. What do you need to help you make decisions about your child's diagnosis and treatment?



- 1  
2  
3  
4  
5  
6  
7  
8  
9  
10  
11  
12  
13  
14  
15  
16  
17  
18  
19  
20  
21  
22  
23  
24  
25  
26  
27  
28  
29  
30  
31  
32  
33  
34  
35  
36  
37  
38  
39  
40  
41  
42  
43  
44  
45  
46  
47  
48  
49  
50  
51  
52  
53  
54  
55  
56  
57  
58  
59  
60
- iv. Does your child have a say in decisions regarding his or her care?
  - v. Have there been disagreements about what to do for your child? Tell me more about those disagreements and how your family has handled that?
7. Now I would like to learn more about how you are feeling and what you are thinking about during this time, shortly after having a child diagnosed with cancer.
- a. Who supports you during this time?
  - b. What changes have you had to make to your life/family?
  - c. Have you felt supported by the team at UNOP? How, or how not? By whom?
  - d. What are you worried about during this time? How does the staff at UNOP address these worries?
  - e. What are you most hoping for during this time? How does the team at UNOP address these hopes?
  - f. As you think about these hopes and worries for your child, which ones stand out as being the most important to you?
  - g. How have your hopes and worries about other things in your life changed since having a child diagnosed with cancer?
8. If you had the opportunity now to speak with other parents of a child recently diagnosed with cancer, what would you tell them? What advice would you give them?

## 2. Survey

### Instructions for the interviewer:

- When conducting this interview (starting with the section titled “Demographic questions”) read all lowercase text aloud to the respondent.
- Instructions for interviewers are provided throughout the questionnaire in capital letters. Words appearing in capital letters are meant to guide the interviewer and should NOT be read aloud.
- Read instructions written in lowercase letters aloud to the respondent to guide him/her in answering the question.
- It is important to read questions in their entirety, exactly as they are written
- Many of the questions have answer choices. It is important for the interviewer to read *all* the answer choices aloud to the respondent before pausing for a response.
- If the respondent does not understand the question, first the interviewer must repeat the whole question. For some questions, there is an alternative explanation that the interviewer can use if the respondent still does not understand the question. If, after repeating twice and using the alternative explanation (if provided), the respondent still does not understand, the interviewer can explain in a few additional words before moving on to the next question and leaving it unanswered.
- If the respondent’s answer is not clear, the interviewer should repeat all of the response options and wait for a clear answer.
- For the questions involving a scale, the scale should be handed to the respondent before the question is read. For each question, the interviewer must point out the options with his finger, for example show “strongly agree”, “slightly agree” and “disagree”. Then, the respondent must use his/her finger to indicate an option and the interviewer will record this choice on the survey.
- The interviewer will be expected to fill out the survey as it is read aloud. Circle the number corresponding to the answer chosen by the respondent. For fill-in or open text answers, write the appropriate information as stated by the respondent.
- It is important that the interviewer is familiar with the instrument before conducting the interviews.

- At the end of the interview, the interviewer should gather a copy of the corresponding patient's demographic sheet (completed by the social worker) and use the medical chart to find the corresponding answers for questions 7-13.

Introduction to the survey:

*Thank you very much for your time and your participation in our study. The purpose of the study is to learn about the experiences and preferences of parents of children with cancer. We hope that the results of this survey will help us better care for parents and children who come to our hospital in the future. Your answers will not affect your child's care, and your medical team will not know your answers to our questions. We would like to hear your opinions and we are not looking for a "correct" answer. Please, be honest with us. Also, since we are going to review the data all together and anonymously it is important that we gather some information about you that may seem obvious while we talk, such as your gender. Although that seems obvious to us now, it is important that I ask these things and that you answer me honestly. Thank you for your participation.*

peer review only

**Demographic questions** – Now we are going to ask you a few questions about yourself

1. What is your gender? [IF THEY DO NOT UNDERSTAND ASK: “Are you a...?”]

- Man  
 Woman

2. What is your relationship to the child?

- Parent  
 Sibling  
 Grandparent  
 Aunt/Uncle  
 Legal guardian  
 Other relative (*Please specify*)

3. What language do you speak at home?

*Choose all that apply*

- English  
 Spanish  
 K'che  
 Q'eqchi'  
 Kaqchikel  
 Mam  
 Poqomchi  
 Tz'utujil  
 Achi  
 Q'anjob'al  
 Ixil  
 Akatek  
 Jakalteq  
 Chuj  
 Poqomam  
 Ch'orti'  
 Awakatek

- Sakapultek  
 Sipakapa  
 Garifuna  
 USpantek  
 Tekitek  
 Mopan  
 Xincan  
 Itza  
 Other (*please specify*)

4. What ethnicity are you? *Choose all that apply.*

- White/Caucasian (European descent)  
 Mestizo  
 Quiché  
 Kaqchikel  
 Mam  
 Quekchí  
 Black Hispanic  
 Other (*please specify*) \_\_\_\_\_

5. What is your religion?

- Catholic  
 Evangelical  
 Other (*please specify*\_\_\_\_)  
 No religion

6. Do you believe in the Mayan spirituality?

- Yes  
 A little  
 No

1  
2  
3 **Medical information** – *Now we will ask a few questions about your child's illness and*  
4 *treatment*  
5

6  
7 7. What is the name of your child's diagnosis?  
8

9 8. Where in your child's body is the [USE THE WORD PARENT USED IN QUESTION  
10 #5] located?  
11

12 9. Has the [USE THE WORD PARENT USED IN QUESTION #5] spread to other places  
13 in the body?  
14

15  Yes

16  No  
17

18 10. How long will all of your child's treatment last? *Please check one.*

19  Less than 6 months

20  6 months to 1 year

21  More than 1 year, but less than 2 years

22  2 years or more  
23  
24

25 11. Which of the following will be part of the treatment of your child's cancer? *Please*  
26 *check all that apply.*

27  Chemotherapy

28  Surgery

29  Radiation treatment  
30  
31

32 12. What is **your** main goal of your child's cancer treatment? *Choose one.*

33  To cure my child's cancer

34  To help my child live longer

35  To decrease symptoms from the cancer  
36  
37

38 13. What is your understanding of **your medical team's** main goal of your child's  
39 cancer treatment? *Choose one.*

40  To cure my child's cancer

41  To help my child live longer

42  To decrease symptoms from the cancer  
43  
44  
45  
46  
47  
48  
49  
50  
51  
52  
53  
54  
55  
56  
57  
58  
59  
60

**Information Exchange** – Now we are going to ask you a few questions about how you learned about your child's illness, including what you think has caused your child's illness, and who/what information was most important, influential, or useful to you when he/she was diagnosed

14. Parents have different ideas about where cancer comes from and we would like to hear from you. How much do you think the following factors explain why your child got cancer?

|                              | <i>A lot</i>             | <i>A little</i>          | <i>Not at all</i>        |
|------------------------------|--------------------------|--------------------------|--------------------------|
| Caused by an infection       | <input type="checkbox"/> | <input type="checkbox"/> | <input type="checkbox"/> |
| Due to heat or cold          | <input type="checkbox"/> | <input type="checkbox"/> | <input type="checkbox"/> |
| Lacking hygiene or nutrition | <input type="checkbox"/> | <input type="checkbox"/> | <input type="checkbox"/> |
| Because of a sacred mission  | <input type="checkbox"/> | <input type="checkbox"/> | <input type="checkbox"/> |

How much do you think the following factors explain why your child got cancer?

|                                                                                              | <i>A lot</i>             | <i>A little</i>          | <i>Not at all</i>        |
|----------------------------------------------------------------------------------------------|--------------------------|--------------------------|--------------------------|
| Due to bad thoughts ( <i>malhecho</i> )                                                      | <input type="checkbox"/> | <input type="checkbox"/> | <input type="checkbox"/> |
| Sent by the devil ( <i>diabólico</i> )                                                       | <input type="checkbox"/> | <input type="checkbox"/> | <input type="checkbox"/> |
| Supernatural; originating from natural elements (e.g. waterfalls, mountains, wind, darkness) | <input type="checkbox"/> | <input type="checkbox"/> | <input type="checkbox"/> |

How much do you think the following factors explain why your child got cancer?

|                                                               | <i>A lot</i>             | <i>A little</i>          | <i>Not at all</i>        |
|---------------------------------------------------------------|--------------------------|--------------------------|--------------------------|
| Lack of respect for nature or the elements of the environment | <input type="checkbox"/> | <input type="checkbox"/> | <input type="checkbox"/> |
| Bad relationships with the community                          | <input type="checkbox"/> | <input type="checkbox"/> | <input type="checkbox"/> |
| Caused by God or another religious figure                     | <input type="checkbox"/> | <input type="checkbox"/> | <input type="checkbox"/> |

How much do you think the following factors explain why your child got cancer?

|                                             | <i>A lot</i>             | <i>A little</i>          | <i>Not at all</i>        |
|---------------------------------------------|--------------------------|--------------------------|--------------------------|
| Caused by uncontrol cell growth             | <input type="checkbox"/> | <input type="checkbox"/> | <input type="checkbox"/> |
| Caused by fear or surprise ( <i>susto</i> ) | <input type="checkbox"/> | <input type="checkbox"/> | <input type="checkbox"/> |
| Caused by medications                       | <input type="checkbox"/> | <input type="checkbox"/> | <input type="checkbox"/> |

1  
2  
3 15. Please look at this paper with different color circles. On the left, there are many  
4 green circles. These indicate something that you found very important. In the middle,  
5 there are just a few yellow circles. These represent something that for you was a little bit  
6 important. And on the right, after the red line, there are not any circles. This indicates  
7 something that wasn't important for you at all.  
8  
9

10 Please, show me with your finger how useful or important each of the following things  
11 was for you as a **source of information regarding your child's cancer**.  
12

- 13 • Conversations with your medical team at UNOP (including oncologists,  
14 psychologists, nurses, social workers)  
15
- 16 • Conversations within your community (for example, with neighbors,  
17 community leaders...)  
18
- 19 • Conversations with your family (siblings, grandparents, aunts, uncles)  
20  
21

22  
23 Please, show me with your finger how useful or important each of the following things  
24 was for you as a **source of information regarding your child's cancer**.  
25

- 26 • Conversations with leaders in your religious or spiritual community  
27
- 28 • An understanding within yourself (including a feeling, hunch or dream)  
29
- 30 • Reading in books or looking for information on the internet  
31  
32

33 16. Parents differ in the amount of information that they want to know about their child's  
34 *diagnosis and treatment*—some want to know everything, others want to know very  
35 little. What is your preference for details of information about your child's diagnosis and  
36 treatment? *Choose one*.  
37  
38

- 39  I want to hear as many details as possible in all situations relating to my child's  
40 cancer and its treatment.
- 41  I want to hear details only in certain situations, in other situations I do not want to  
42 hear the details
- 43  I prefer not to hear a lot of details.  
44  
45

46 17. How *important* is it to you to know about your child's likelihood of being cured?

- 47  It is very important for me to know the likelihood of cure
- 48  It is not very important for me to know the likelihood of cure
- 49  I prefer not to know the likelihood of cure  
50

51 18. How important is it to you to know about how likely it is that cancer or its treatment  
52 may affect your child's life in the future?

- 53  It is very important for me to know the likelihood this treatment affecting my child
- 54  It is not very important for me to know the likelihood this treatment affecting my child
- 55  I prefer not to know the likelihood this treatment affecting my child  
56  
57

1  
2  
3 19. Now, using the same colored circles, we would like to ask you about your  
4 preferences regarding the **way** in which your medical team communicates. Remember  
5 that, on the left, there are many green circles, and these indicate something that is very  
6 important for you. In the middle there are a few yellow circles which represent  
7 something that is slightly important for you. On the right, after the red line, there are not  
8 any circles. This indicates something that is not important to you.  
9  
10

11  
12 We would like to know, how important is it to you that your doctors and other health  
13 professionals...  
14

- 15
- 16
- 17 • Explain things in a way I can understand
- 18
- 19 • Are open and honest with me
- 20
- 21
- 22 • Involve me in making decisions about my child's care
- 23
- 24 • Pay attention to my emotions and feelings
- 25

26 How important is it to you that your doctors and other health professionals...?  
27

- 28
- 29 • Help me deal with the things nobody knows related to my child's cancer
- 30
- 31 • Help me understand ways to take care of my child while I'm dealing with  
32 cancer
- 33
- 34
- 35 • Ask about my culture, background, and beliefs
- 36
- 37
- 38

39 20. At the time of diagnosis, did the doctor ask about your previous knowledge about  
40 cancer? *Choose one.*  
41

- 42  Yes
- 43  No
- 44
- 45
- 46

47 21. How often do you feel like you are given the information that is important to you  
48 without needing to ask for it? *Choose one.*  
49

- 50  Always
- 51  Sometimes
- 52  Never
- 53
- 54
- 55
- 56
- 57
- 58
- 59
- 60



1  
2  
3 22. When you see your child's doctor, how often do you have questions about your  
4 child's care that you want to discuss but do not? *Choose one.*

- 5  
6  Always  
7  Sometimes  
8  Never  
9

10  
11 [IF THE RESPONDENT DOES NOT UNDERSTAND ASK: When you have questions  
12 for your doctor, how often are you too afraid to ask them?

- 13  
14  Always  
15  Sometimes  
16  Never  
17  
18  
19  
20  
21  
22  
23  
24  
25  
26  
27  
28  
29  
30  
31  
32  
33  
34  
35  
36  
37  
38  
39  
40  
41  
42  
43  
44  
45  
46  
47  
48  
49  
50  
51  
52  
53  
54  
55  
56  
57  
58  
59  
60

For peer review only

1  
2  
3 **Decision Making** – We are now going to ask you about how you and your family make  
4 decisions. First, in general, and then specifically how you have made decisions  
5 regarding your child's treatment.  
6  
7

8 23. Who do you consider to be the person who makes most decisions in your house in  
9 general? These might be decisions about care of the children, where the family lives, or  
10 how money is spent, for example. *Choose one.*

- 11  I am the person most involved in making decisions.  
12  I share decision-making equally with my child's other parent or other family member.  
13  Another parent or family member makes most of the decisions in my house  
14  
15

16 24. Who do you consider to be the parent most involved in making decisions about your  
17 child's cancer treatment? *Choose one.*

- 18  I am the parent most involved in making decisions.  
19  I share decision-making equally with my child's other parent or other family member.  
20  Another parent or family member makes most of the decisions for my child's  
21 treatment.  
22  
23

24 25. Parents differ in the ways they prefer to make treatment decisions for their children.  
25 Which statement best describes the role you **would prefer** to play when decisions  
26 about treatment for your child's cancer are made? *Please check one.*

- 27  I prefer to make the decisions about treatment  
28  I prefer that my child's oncologist and I make the decisions together.  
29  I prefer that my child's oncologist make most of the decisions  
30  
31

32 26. Which statement best describes the role you **actually played** when making  
33 decisions about treatment for your child's cancer? *Please check one.*

- 34  I made the decisions about treatment  
35  My child's oncologist and I made the decisions together.  
36  My child's oncologist made the decisions  
37  
38

39 27. Some families have help making decisions from people in their community, which  
40 statement best describes the role **your community** played in helping you make  
41 decisions? *Choose one*

- 42  I/We made the decisions about treatment without input from my community  
43  I/We made the decisions with help from members or leaders in my community  
44  My community, or a leader in my community, made the decision and told me what  
45 was best  
46  
47

48 28. Some families have help making decisions from religious or spiritual leaders, which  
49 statement best describes the role **your religious/spiritual leaders** played in helping you  
50 make decisions? *Choose one.*

- 51  I/We made the decisions about treatment without input from religious or spiritual  
52 leaders  
53  I/We made the decisions with help from religious or spiritual leaders  
54  My spiritual or religious leaders made the decision and told me what was best  
55  
56  
57  
58  
59  
60

1  
2  
3  
4 29. At the time of diagnosis, which of the following statements best describes how your  
5 oncologist explained your child's treatment plan. *Please check one*

- 6  He/she gave me different options and I chose what was best  
7  He/she gave me different options, and he/she told me what was best  
8  He/she gave me only one option  
9  
10  
11  
12  
13  
14  
15  
16  
17  
18  
19  
20  
21  
22  
23  
24  
25  
26  
27  
28  
29  
30  
31  
32  
33  
34  
35  
36  
37  
38  
39  
40  
41  
42  
43  
44  
45  
46  
47  
48  
49  
50  
51  
52  
53  
54  
55  
56  
57  
58  
59  
60

For peer review only

1  
2  
3 30. Using the colored circles again, but this time we would like to know **how much you**  
4 **agree or disagree with the following statements**. Remember that on the left there  
5 are many green circles. These indicate something you completely agree with. In the  
6 middle, the few yellow circles, indicate something that you slightly agree with. And on  
7 the right, after the red line, there are no circles. This indicates something you disagree  
8 with.  
9

10  
11 Now I would like to know what you think about the decisions you have made related to  
12 your child's cancer.  
13

14 **How much do you agree or disagree with...**

- 15  
16  
17
  - 18 • I have made the right decisions
  - 19 • I regret the choices that were made
  - 20 • I would make the same choices if I had to do it all over again
  - 21 • My choices did my child harm
  - 22 • The decisions were wise

23  
24  
25  
26  
27  
28  
29  
30  
31  
32  
33  
34  
35  
36  
37  
38  
39  
40  
41  
42  
43  
44  
45  
46  
47  
48  
49  
50  
51  
52  
53  
54  
55  
56  
57  
58  
59  
60

1  
2  
3 **Medical team** – Now we are going to ask you a little bit about the team taking care of  
4 you at UNOP, and your relationship with this team.  
5

6  
7 31. We will use the circles again, but this time we would like to know **how much you**  
8 **agree or disagree with the following statements**. As always, on the left there are  
9 many green circles. These indicate something you completely agree with. In the middle,  
10 the few yellow circles, indicate something that you slightly agree with. And on the right,  
11 after the red line, there are no circles. This indicates something you disagree with.  
12

13 **How much do you agree with each of the following statements about your child's**  
14 **doctors?**  
15

- 16 • I trust my child's doctors
- 17
- 18 • My child's doctors ask about how my family is coping with cancer
- 19
- 20 • My child's doctors care about my child's quality of life
- 21
- 22 • My child's doctors offer my family hope
- 23
- 24
- 25
- 26

27  
28 32. Using the colored circles, **how much do you agree with each of the following**  
29 **statements regarding doctors in general?**  
30

- 31 • Doctors are prying too much into personal matters when they ask a lot of  
32 questions about a patient's culture, or community. [IF THE RESPONDENT  
33 DOES NOT UNDERSTAND: *This statement means that you think the doctors*  
34 *are being nosy when they ask many questions about a patient's community*  
35 *or culture.*]  
36
- 37
- 38 • I'd rather have doctors and nurses make the decisions about what's best than  
39 for them to give me a whole lot of choices. [IF THE RESPONDENT DOES  
40 NOT UNDERSTAND: *This means that you prefer that the doctors decide*  
41 *without offering you choices.*]  
42
- 43
- 44 • It is best for parents if they do not have a full explanation of their child's  
45 medical condition  
46
- 47 • It is best for children if they do not have a full explanation of their medical  
48 condition  
49
- 50
- 51 • Parents should not try to find out about their conditions on their own, they  
52 should rely on their doctors' knowledge.  
53
- 54
- 55
- 56
- 57
- 58
- 59
- 60

1  
2  
3 33. How comfortable do your doctors and other health professionals make you feel  
4 asking questions? *Choose one.*

- 5  Very comfortable  
6  Somewhat comfortable  
7  Not at all comfortable  
8  
9

10 34. How often do your doctors and other health professionals have open and honest  
11 communication with you? *Choose one.*

- 12  
13  Always  
14  Sometimes  
15  Never  
16  
17

18 35. How much do your doctors and other health professionals give you information and  
19 resources to help you make decisions about your child's care? *Choose one.*

- 20  A Great Deal  
21  Somewhat  
22  Not at all  
23  
24

25 36. How well do your doctors and other health professionals talk with you about how to  
26 cope with any fears, stress, and other feelings? *Choose one.*

- 27  Very Well  
28  Fairly Well  
29  Poorly  
30  
31

32 37. How often do your doctors and other health professionals make sure you  
33 understand the steps in your child's care? *Choose one.*

- 34  Always  
35  Sometimes  
36  Never  
37  
38

39 38. How well do your doctors and other health professionals help you deal with the  
40 things nobody really knows about cancer? *Choose one.* [IF THE RESPONDENT DOES  
41 NOT UNDERSTAND ASK: *How well do the doctors help you manage for example, that*  
42 *you don't know if your child will respond to treatment, or if the cancer is going to come*  
43 *back?]*

- 44  Very Well  
45  Fairly Well  
46  Poorly  
47  
48

49 39. How often do your doctors and other health professionals take into account your  
50 culture, background or religious beliefs when planning treatment for your child? *Choose*  
51 *one.*

- 52  Always  
53  Sometimes  
54  Never  
55  
56  
57  
58  
59  
60

1  
2  
3 40. When you ask questions, how often do you get answers that are understandable?  
4 *Choose one.*

- 5  Always  
6  Sometimes  
7  Never  
8  
9

10 41. Overall, how satisfied are you with the communication with your doctors and other  
11 health professionals? *Choose one.*

- 12  Very satisfied  
13  Fairly satisfied  
14  Not at all satisfied  
15  
16

17  
18 42. Is there anything else you would like us to know about your experiences with  
19 communication about your child's cancer care or diagnosis?  
20  
21  
22  
23  
24  
25  
26  
27  
28  
29  
30  
31  
32  
33  
34  
35  
36  
37  
38  
39  
40  
41  
42  
43  
44  
45  
46  
47  
48  
49  
50  
51  
52  
53  
54  
55  
56  
57  
58  
59  
60

## 3. Codebook

| Topic                                           | Category                                                                                                                  | Code                                     | Definition                                                                                                                                                                                                                                                                                                             |                                                                                                                                     |
|-------------------------------------------------|---------------------------------------------------------------------------------------------------------------------------|------------------------------------------|------------------------------------------------------------------------------------------------------------------------------------------------------------------------------------------------------------------------------------------------------------------------------------------------------------------------|-------------------------------------------------------------------------------------------------------------------------------------|
| <b>Direction of conversation</b>                | <b>Clinician speaker</b>                                                                                                  | Oncologist to parent/family              | Clear that oncologist is speaking directly to the caregiver only.                                                                                                                                                                                                                                                      |                                                                                                                                     |
|                                                 |                                                                                                                           | Psychologist to parent/family            | Clear that psychologist is speaking directly to the caregiver only.                                                                                                                                                                                                                                                    |                                                                                                                                     |
| <b>Clinician patient-centered communication</b> | <b>Supportive talk:</b><br><i>Verbal behaviors that validate or support the patient's emotional or motivational state</i> | Verbal attentiveness                     | Showing understanding, paraphrasing, empathy, showing concern, worry, reassurance, optimism, legitimizing, respect, descriptions of inclusivity, validation. Include statements like "If you ever need anything come find me." "If you have more questions you can always ask" "It is my pleasure to help." "Cheer up" |                                                                                                                                     |
|                                                 |                                                                                                                           | <b>Multidisciplinary approach</b>        | Team care                                                                                                                                                                                                                                                                                                              | Descriptions of clinicians working as a team to care for family. Does NOT include all general statements of "we" from providers.    |
|                                                 |                                                                                                                           | <b>Direct communication</b>              | Honesty                                                                                                                                                                                                                                                                                                                | Explicit references to honest or direct communication (e.g. "It is important that we are honest with you")                          |
| <b>Decision making</b>                          | <b>Decision makers (who)</b><br><b>Using for both cancer related and non-cancer related decision</b>                      | Parents as joint decision makers         | Descriptions of two caregivers making decisions together as explicitly stated by caregiver                                                                                                                                                                                                                             |                                                                                                                                     |
|                                                 |                                                                                                                           | Parent as single decision maker          | Descriptions of one caregiver making decisions alone as explicitly stated by caregiver                                                                                                                                                                                                                                 |                                                                                                                                     |
|                                                 |                                                                                                                           | Extended decision maker                  | Descriptions of decisions made that involve family beyond caregivers or community as explicitly stated by caregiver, includes God.                                                                                                                                                                                     |                                                                                                                                     |
|                                                 |                                                                                                                           | Child involved in decision making        | Descriptions of involving the child in decision making as explicitly stated by caregiver                                                                                                                                                                                                                               |                                                                                                                                     |
|                                                 |                                                                                                                           | Deference to provider                    | Explicit statements from caregivers that they prefer provider to make decision, or that they left decision up to provider, including statements that it is not their "role" to make such decisions                                                                                                                     |                                                                                                                                     |
|                                                 |                                                                                                                           | Team talk (parent)                       | References (made by caregivers) to decisions that were made together with medical team                                                                                                                                                                                                                                 |                                                                                                                                     |
|                                                 |                                                                                                                           | <b>Decision making (what) (INT only)</b> | Decisions unrelated to cancer                                                                                                                                                                                                                                                                                          | Descriptions of decision making (by family) that is not related to cancer or cancer treatment – only code in interview transcripts. |
|                                                 |                                                                                                                           |                                          | Cancer decisions                                                                                                                                                                                                                                                                                                       | Descriptions of decision making (by family) related to child's cancer care – only code in interview transcripts                     |
|                                                 | <b>Decision making (how)</b>                                                                                              | Team talk (provider): eliciting goals    | Provider elicits goals from caregiver to assist with decision making                                                                                                                                                                                                                                                   |                                                                                                                                     |
|                                                 |                                                                                                                           | Team talk (provider): offering choices   | Provider offers options or choices to caregiver                                                                                                                                                                                                                                                                        |                                                                                                                                     |



|  |                                                                         |                                                                                                                 |                                                                                                                                                                                                                                                                                                                                                                             |
|--|-------------------------------------------------------------------------|-----------------------------------------------------------------------------------------------------------------|-----------------------------------------------------------------------------------------------------------------------------------------------------------------------------------------------------------------------------------------------------------------------------------------------------------------------------------------------------------------------------|
|  |                                                                         | Team talk (provider): family as part of the team                                                                | Provider discusses caregiver as part of the team making medical decisions (e.g. “we all make the decision together,” “We need your authorization to treat,” “If you agree...”). Does NOT include verbally attentive references such as “don’t worry we will explain...” OR “we will explain X to you”                                                                       |
|  |                                                                         | Option talk: discussion of risks                                                                                | Provider discussion of comparative risks or side effects of presented options                                                                                                                                                                                                                                                                                               |
|  |                                                                         | No-Option talk: discussion of risks                                                                             | Provider discussion of risks or side effects of one therapy without suggesting alternative                                                                                                                                                                                                                                                                                  |
|  |                                                                         | Option talk: discussion of benefits                                                                             | Provider discussion of comparative benefits of presented options                                                                                                                                                                                                                                                                                                            |
|  |                                                                         | No-Option talk: discussion of benefits                                                                          | Provider discussion of benefits of one therapy without suggesting alternative                                                                                                                                                                                                                                                                                               |
|  |                                                                         | Option talk: discussion of evidence                                                                             | Provider discussion of evidence base for presented options                                                                                                                                                                                                                                                                                                                  |
|  |                                                                         | No-Option talk: discussion of evidence                                                                          | Provider discussion of evidence base one therapy without suggesting alternative including explaining to the family why we are treating. E.g. “if he responds, we will give him ___” “we will do this if the first round of chemo works.”                                                                                                                                    |
|  |                                                                         | Decision talk: preference-based                                                                                 | Provider elicits informed preferences and asks caregiver to decide between choices or suggests a decision based on preferences or goals expressed by caregiver.                                                                                                                                                                                                             |
|  |                                                                         | Decision talk: Health promotion                                                                                 | Framing or nudging towards decision among choices                                                                                                                                                                                                                                                                                                                           |
|  |                                                                         | No-decision talk: Consequences                                                                                  | Provider describing potential consequences of NOT agreeing to recommended treatment plan.                                                                                                                                                                                                                                                                                   |
|  |                                                                         | No-decision talk: Giving decision                                                                               | Provider describes decision without options and without involving caregiver. Do NOT include hypothetical treatment decisions.                                                                                                                                                                                                                                               |
|  | <b>Decision making (why) MAY USE IN ALL TRANSCRIPTS, PARENT SPEAKER</b> | Family Factors- other children, financial influences                                                            | References to decisions that were made or complicated based on finances. Do NOT code all references to finances, just when they affect decision making.<br><br>References to decisions that were made or complicated by other children.                                                                                                                                     |
|  |                                                                         | Child’s best interest- symptoms/medical facts, quality of life concern, doing what is right/being a good parent | References to decisions that were made based on medical facts or the symptoms/condition of the child.<br><br>References to decisions that were made based on quality of life concern (e.g. so they can go to school, or be home with friends).<br><br>Decisions made because it is “the right thing to do” for the child or because it is what “a good caregiver should do” |
|  |                                                                         | Lack of agency- lack of choice, perceived threat, limited information                                           | Decisions that were made because it felt like the only option.<br><br>Decisions that were made because of fear.                                                                                                                                                                                                                                                             |

1  
2  
3  
4  
5  
6  
7  
8  
9  
10  
11  
12  
13  
14  
15  
16  
17  
18  
19  
20  
21  
22  
23  
24  
25  
26  
27  
28  
29  
30  
31  
32  
33  
34  
35  
36  
37  
38  
39  
40  
41  
42  
43  
44  
45  
46  
47  
48  
49  
50  
51  
52  
53  
54  
55  
56  
57  
58  
59  
60

|  |  |  |                                                                     |
|--|--|--|---------------------------------------------------------------------|
|  |  |  | Descriptions of lack of information as a barrier to decision making |
|--|--|--|---------------------------------------------------------------------|

For peer review only

# BMJ Open

## Cancer Treatment Decision-Making among Parents of Pediatric Oncology Patients in Guatemala: A Mixed-Methods Study

|                                 |                                                                                                                                                                                                                                                                                                                                                                                                                                                                                                                                                                                                                                                                                                                                                                                                                                                                 |
|---------------------------------|-----------------------------------------------------------------------------------------------------------------------------------------------------------------------------------------------------------------------------------------------------------------------------------------------------------------------------------------------------------------------------------------------------------------------------------------------------------------------------------------------------------------------------------------------------------------------------------------------------------------------------------------------------------------------------------------------------------------------------------------------------------------------------------------------------------------------------------------------------------------|
| Journal:                        | <i>BMJ Open</i>                                                                                                                                                                                                                                                                                                                                                                                                                                                                                                                                                                                                                                                                                                                                                                                                                                                 |
| Manuscript ID                   | bmjopen-2021-057350.R2                                                                                                                                                                                                                                                                                                                                                                                                                                                                                                                                                                                                                                                                                                                                                                                                                                          |
| Article Type:                   | Original research                                                                                                                                                                                                                                                                                                                                                                                                                                                                                                                                                                                                                                                                                                                                                                                                                                               |
| Date Submitted by the Author:   | 27-Jun-2022                                                                                                                                                                                                                                                                                                                                                                                                                                                                                                                                                                                                                                                                                                                                                                                                                                                     |
| Complete List of Authors:       | Graetz, Dylan; St Jude Children's Research Hospital<br>Rivas, Silvia; Unidad Nacional de Oncologia Pediatrica<br>Wang, Huiqi; Saint Jude Children's Research Hospital, Global Pediatric Medicine<br>Vedaraju, Yuvanesh; Saint Jude Children's Research Hospital, Global Pediatric Medicine<br>Ferrara, Gia; St Jude Children's Research Hospital<br>Fuentes, Lucia; Unidad Nacional de Oncologia Pediatrica, Psychology<br>Cáceres- Serrano, Ana; Unidad Nacional de Oncologia Pediatrica<br>Antillon-Klussmann, Federico; Unidad Nacional de Oncologia Pediatrica; Universidad Francisco Marroquin Facultad de Medicina<br>Devidas, Meenakshi; St Jude Children's Research Hospital<br>Metzger, Monika; Saint Jude Children's Research Hospital,<br>Rodriguez-Galindo, C; St Jude Children's Research Hospital<br>Mack, Jennifer; Dana-Farber Cancer Institute |
| <b>Primary Subject Heading</b>: | Global health                                                                                                                                                                                                                                                                                                                                                                                                                                                                                                                                                                                                                                                                                                                                                                                                                                                   |
| Secondary Subject Heading:      | Paediatrics, Oncology, Patient-centred medicine, Qualitative research                                                                                                                                                                                                                                                                                                                                                                                                                                                                                                                                                                                                                                                                                                                                                                                           |
| Keywords:                       | PAEDIATRICS, Paediatric oncology < ONCOLOGY, QUALITATIVE RESEARCH                                                                                                                                                                                                                                                                                                                                                                                                                                                                                                                                                                                                                                                                                                                                                                                               |
|                                 |                                                                                                                                                                                                                                                                                                                                                                                                                                                                                                                                                                                                                                                                                                                                                                                                                                                                 |

SCHOLARONE™  
Manuscripts



I, the Submitting Author has the right to grant and does grant on behalf of all authors of the Work (as defined in the below author licence), an exclusive licence and/or a non-exclusive licence for contributions from authors who are: i) UK Crown employees; ii) where BMJ has agreed a CC-BY licence shall apply, and/or iii) in accordance with the terms applicable for US Federal Government officers or employees acting as part of their official duties; on a worldwide, perpetual, irrevocable, royalty-free basis to BMJ Publishing Group Ltd ("BMJ") its licensees and where the relevant Journal is co-owned by BMJ to the co-owners of the Journal, to publish the Work in this journal and any other BMJ products and to exploit all rights, as set out in our [licence](#).

The Submitting Author accepts and understands that any supply made under these terms is made by BMJ to the Submitting Author unless you are acting as an employee on behalf of your employer or a postgraduate student of an affiliated institution which is paying any applicable article publishing charge ("APC") for Open Access articles. Where the Submitting Author wishes to make the Work available on an Open Access basis (and intends to pay the relevant APC), the terms of reuse of such Open Access shall be governed by a Creative Commons licence – details of these licences and which [Creative Commons](#) licence will apply to this Work are set out in our licence referred to above.

Other than as permitted in any relevant BMJ Author's Self Archiving Policies, I confirm this Work has not been accepted for publication elsewhere, is not being considered for publication elsewhere and does not duplicate material already published. I confirm all authors consent to publication of this Work and authorise the granting of this licence.

1  
2  
3 **Title:** Cancer Treatment Decision-Making among Parents of Pediatric Oncology Patients in  
4  
5 Guatemala: A Mixed-Methods Study  
6

7  
8 **Running Head:** Decision-Making in Guatemala  
9

10 **Authors:** Dylan E. Graetz MD MPH<sup>a</sup>, Silvia Elena Rivas MD<sup>b</sup>, Huiqi Wang MS<sup>a</sup>, Yuvanesh  
11  
12 Vedaraju MS<sup>a</sup>, Gia Ferrara MSGH<sup>a</sup>, Ana Lucia Fuentes<sup>b</sup>, Ana Caceres-Serrano PhD<sup>b</sup>, Federico  
13  
14 Antillon-Klussmann MD PhD<sup>b,c</sup>, Meenakshi Devidas PhD, MBA<sup>a</sup>, Monika L. Metzger MD MS<sup>a</sup>,  
15  
16 Carlos Rodriguez-Galindo MD<sup>a</sup>, Jennifer W. Mack MD MPH<sup>d</sup>  
17  
18

19 **Affiliations:**  
20

21 <sup>a</sup> St. Jude Children's Research Hospital, Memphis, Tennessee, USA  
22

23 <sup>b</sup> Unidad Nacional de Oncología Pediátrica, Guatemala City, Guatemala  
24

25 <sup>c</sup> Francisco Marroquin University School of Medicine, Guatemala City, Guatemala  
26

27 <sup>d</sup> Dana Farber Cancer Institute/Boston Children's Hospital, Boston, Massachusetts, USA  
28  
29

30 **Corresponding Author:** Dylan Graetz, St. Jude Children's Research Hospital, 262 Danny  
31  
32 Thomas Place, Mailstop 721, Memphis TN 38105-3678; phone: 901 595-0763; email:  
33  
34 [dylan.graetz@stjude.org](mailto:dylan.graetz@stjude.org)  
35  
36

37 **Funding source:** This work was funded by American Lebanese Syrian Associated Charities of  
38  
39 St. Jude Children's Research Hospital and a Conquer Cancer Young Investigator Award (award  
40  
41 number 17290). Any opinions, findings, and conclusions expressed in this material are those of  
42  
43 the authors and do not necessarily reflect those of the American Society of Clinical Oncology or  
44  
45 Conquer Cancer.  
46  
47

48 **Conflict of interest statement:** The authors have no conflicts of interest relevant to this article  
49  
50 to disclose.  
51  
52  
53  
54  
55  
56  
57  
58  
59  
60

1  
2  
3 **Contributorship statement:** Dr. Graetz conceptualized and designed the study and data  
4 collection tools, supervised pilot testing and data collection, analyzed qualitative data, drafted the  
5 initial manuscript, and reviewed and revised the manuscript.  
6  
7

8  
9  
10 Drs. Rivas and Antillon-Klussman contributed to study design, facilitated study approval and  
11 supervised data collection at Unidad Nacional Oncología Pediátrica, and reviewed and revised  
12 the manuscript.  
13  
14

15  
16  
17 Ms. Wang, Mr. Vedaraju, and Dr. Devidas conducted statistical data analysis and reviewed and  
18 revised the manuscript.  
19

20  
21 Ms. Ferrara analyzed the qualitative data and reviewed and revised the manuscript.  
22

23  
24 Ms. Fuentes and Ms. Caceres-Serrano contributed to study design, conducted pilot testing,  
25 collected data, and reviewed and revised the manuscript.  
26  
27

28  
29 Drs. Metzger and Rodriguez-Galindo contributed to study design and reviewed and revised the  
30 manuscript.  
31

32  
33 Dr. Mack conceptualized and designed the study and data collection tools, and critically  
34 reviewed the manuscript for important intellectual content.  
35  
36

37  
38 All authors approved the final manuscript as submitted and agree to be accountable for all  
39 aspects of the work.  
40  
41

42 **Abbreviations:** LMICs: low- and middle-income countries; UNOP: Unidad Nacional de  
43 Oncología Pediátrica; St. Jude: St. Jude Children's Research Hospital  
44

45  
46  
47 **Acknowledgements:** The authors would like to thank psychologists Pilar Alvarado, Inés  
48 Ordoñez, Paulina Salazar and Debby Velleman for their efforts assisting in qualitative data  
49 collection, as well as child psychologists Ana Lucia Espinoza Asturias and Gabriela Maria  
50 Garcia Palencia for their efforts assisting in survey administration, and the entire *Medicina*  
51  
52  
53  
54  
55  
56  
57  
58  
59  
60

1  
2  
3 *Integral* team at Unidad Nacional de Oncología Pediátrica for supporting this work. We would  
4  
5 also like to thank the parent participants who made this study possible.  
6

7  
8 **Key words:** Pediatric cancer; Guatemala; Decision-Making; Communication  
9

10 **Total number of text pages:** 24; **Tables:** 4; **Figures:** 0; **Supporting files:** 1  
11  
12  
13  
14  
15  
16  
17  
18  
19  
20  
21  
22  
23  
24  
25  
26  
27  
28  
29  
30  
31  
32  
33  
34  
35  
36  
37  
38  
39  
40  
41  
42  
43  
44  
45  
46  
47  
48  
49  
50  
51  
52  
53  
54  
55  
56  
57  
58  
59  
60

For peer review only

## Abstract

**Objectives:** To examine treatment decision-making priorities and experiences among parents of children with cancer in Guatemala.

**Setting:** This study was conducted at Guatemala's national pediatric cancer center in Guatemala City.

**Participants:** Spanish speaking parents of pediatric patients ( $\leq 18$  years of age) diagnosed with any form of cancer within the 8 weeks prior to study enrollment. The quantitative portion of this study included 100 parent participants; the qualitative component included 20 parents. Most participants were Catholic or Evangelical Spanish-speaking mothers.

**Outcomes:** Priorities and experiences of cancer treatment decision-making including decision-making role and experienced regret.

**Results:** A range of pediatric ages and cancer diagnoses were included. Most Guatemalan parents surveyed (70%) made decisions about their child's cancer together and almost all (94%) without input from their community. Surveyed parents predominately preferred shared decision-making with their child's oncologist (76%), however 69% agreed it was best not to be provided with many options. Two-thirds of surveyed parents (65%) held their preferred role in decision-making, with fathers more likely to hold their preferred role than mothers ( $p=0.02$ ). A small number of parents (11%) experienced heightened decisional regret, which did not correlate with sociodemographic characteristics or preferred decision-making role. Qualitative results supported quantitative findings, demonstrating a decision-making process that emphasized trust and honesty.

**Conclusions:** Guatemalan parents preferred to make decisions with their medical team and appreciated providers who were honest and inclusive, but directive about decisions. This study



1  
2  
3 reinforces the importance of the provider-parent relationship and encourages clinicians in all  
4  
5 settings to ask about and honor each parent's desired role in decision-making.  
6  
7  
8  
9

## 10 **Article Summary:**

### 11 Strengths and limitations of this study:

- 12 • This study investigated communication and decision-making, key components of patient-  
13  
14 centered care, in a middle-income country, a previously understudied area of research in  
15  
16 this population.  
17  
18
- 19 • The convergent mixed-methods study design enabled broad assessment of decision-  
20  
21 making priorities as well as deep exploration of decision-making processes among  
22  
23 Guatemalan parents of children with cancer.  
24  
25
- 26 • Use of survey items previously validated in high-income countries allowed for  
27  
28 comparison to published literature from these settings.  
29  
30
- 31 • The focus on the diagnostic period limited the ability to consider how decision-making  
32  
33 may change over the cancer continuum.  
34  
35
- 36 • Study was conducted at single cancer center in one middle-income country, and thus  
37  
38 results may not apply to other low- and middle-income countries  
39  
40  
41  
42  
43  
44

45 **Data sharing statement:** Extra data is available upon reasonable request by emailing the  
46  
47 corresponding author.  
48  
49  
50  
51  
52  
53  
54  
55  
56  
57  
58  
59  
60

## Introduction

From the time of diagnosis, parents of children with cancer are faced with difficult decisions regarding care and treatment. Shared decision-making is associated with improved patient-reported outcomes for adult cancer patients,[1] and research from high-income Western countries has emphasized a similar model for parents of children with cancer. [2,3] Effective shared decision-making depends on high-quality communication [3] through which pediatric oncology providers explore parents' goals of care as they present treatment options and determine a mutually acceptable action plan.

Parental values affect the extent to which they desire to be involved in decision-making, and both individual as well as community belief systems are shaped by culture. Cultural differences between patients and healthcare providers during decision-making have been demonstrated to result in erroneous assumptions and interpersonal conflict. [4] For parents of children with cancer, having their preferred role in decision making may increase trust in healthcare providers[5] and decrease regret.[3,6] Nevertheless, culture is rarely accounted for in research surrounding patient-provider communication and decision-making,[7] and very few studies have explored decision-making among pediatric cancer patients in low- and middle-income countries,[8] where >90% of children with cancer live.[9] The purpose of this mixed-methods study was to examine cancer treatment decision-making among parents of children with cancer in Guatemala at the time of diagnosis. Guatemala is a small but culturally diverse country; with 40% of the population comprised of 24 distinct ethnic groups who speak >20 different languages. We sought to assess the decision-making preferences and experiences of parents of

1  
2  
3 children with cancer through a cross-sectional survey and used audio-recorded diagnostic  
4  
5 conversations and semi-structured interviews to explore decision-making processes and  
6  
7 influences in greater depth, including who was involved in the process, how cancer treatment  
8  
9 decisions were made, and parental reflections on early decisions.  
10  
11  
12  
13

## 14 **Methods**

15  
16  
17  
18  
19 This study utilized a convergent mixed-methods design. Quantitative data was collected from a  
20  
21 verbally administered cross-sectional survey. Qualitative data included diagnostic conversations  
22  
23 between healthcare providers and parents of newly diagnosed children with cancer, and  
24  
25 subsequent semi-structured interviews.  
26  
27  
28  
29  
30

### 31 Participants and setting

32  
33  
34  
35 This study was conducted at Guatemala's national pediatric cancer center: Unidad Nacional de  
36  
37 Oncología Pediátrica (UNOP). UNOP is located in Guatemala City, Guatemala. Approximately  
38  
39 500 new cases of childhood cancer are diagnosed at UNOP annually, and the survival rate at  
40  
41 UNOP is about 67%.<sup>[10]</sup>  
42  
43  
44  
45

46  
47 Eligibility criteria for the quantitative sample and qualitative sample were the same and included  
48  
49 Spanish speaking parents of pediatric patients ( $\leq 18$  years of age) diagnosed with any form of  
50  
51 cancer within the past 8 weeks. Both components of the study were conducted in the outpatient  
52  
53 psychology and oncology clinics at UNOP. Parents participated in either the quantitative or  
54  
55  
56  
57  
58  
59  
60

1  
2  
3 qualitative portion of the study, but not both. Of 104 parents approached for the quantitative  
4 sample, 100 (96%) agreed to participate. Participants in the qualitative sample were recruited  
5 sequentially, with additional purposive sampling [11] to ensure representation of a range of  
6 pediatric ages and diagnoses as well as families with diverse socioeconomic and cultural  
7 backgrounds. Overall, 32 parents were approached for participation in the qualitative study and  
8 20 parents agreed to participate. Thematic saturation [12] was reached after enrollment of 20  
9 parents and no further participants were approached.  
10  
11  
12  
13  
14  
15  
16  
17  
18  
19  
20

### 21 Ethics approval

22  
23  
24  
25  
26 Written informed consent was obtained in Spanish by a native Spanish speaker for all  
27 participants. This study was performed in compliance with international regulations for  
28 protection of human subjects and approved by institutional review boards (IRBs) and ethics  
29 committees at St. Jude and UNOP (IRB Number: 19-0162; Reference Number: 010262).  
30  
31  
32  
33  
34  
35  
36  
37

### 38 Study design and data collection

39  
40  
41  
42 For the quantitative component of the study, a cross-sectional survey was developed using items  
43 previously used in high-income countries [5,6,13] as well as novel questions specific to the study  
44 population. The survey was developed in English, translated into Spanish, pilot tested with 23  
45 parents to establish face and content validity through iterative revision, and back translated into  
46 English to ensure the original intent of questions was preserved.  
47  
48  
49  
50  
51  
52  
53  
54  
55  
56  
57  
58  
59  
60

1  
2  
3 *Sociodemographic information* was obtained through survey questions on participant's gender,  
4 relationship to the child, languages spoken, religion, ethnicity, household income, and marital  
5 status. Demographic information on patients including gender, age, and diagnosis was obtained  
6 from medical record review.  
7  
8  
9

10  
11  
12  
13  
14 *Decision making preferences and experiences* were assessed through the survey, first by asking  
15 parents "Who do you consider to be the person who makes most decisions in your house in  
16 general?", and "about your child's cancer treatment?". Response options included "Another  
17 parent or family member makes most of the decisions", "I am the parent most involved in  
18 making decisions" and, "I share decision-making equally with my child's other parent or family  
19 member". Parents were asked: "Which statement best describes the role your community played  
20 in helping you make decisions?". Response options included: "I/We made decisions about  
21 treatment without input from my community", "...with help from members or leaders in my  
22 community", and "My community, or a leader in my community, made the decision and told me  
23 what was best". A similar question asked about involvement of religious or spiritual leaders in  
24 decision-making.  
25  
26  
27  
28  
29  
30  
31  
32  
33  
34  
35  
36  
37  
38  
39  
40  
41

42 Regarding decision-making with the child's oncologist, parents were asked to describe "the role  
43 you would prefer to play when decisions about treatment for your child's cancer are made".  
44

45 Response options included: "I prefer that my child's oncologist and I make the decisions  
46 together", "I prefer that my child's oncologist make most of the decisions", or "I prefer to make  
47 the decisions about treatment". Parents were then asked about "the role you actually played when  
48 making decisions about treatment for your child's cancer", with similar response options framed  
49  
50  
51  
52  
53  
54  
55  
56  
57  
58  
59  
60

1  
2  
3 in the past tense. To further assess preferences for shared decision-making, parents were asked  
4  
5 “How much do you agree with the following statement: I’d rather have doctors and nurses make  
6  
7 the decisions about what’s best than for them to give me a whole lot of choices”. Response  
8  
9 options included: “strongly agree”, “slightly agree”, and “disagree”. Parents were also asked “At  
10  
11 the time of diagnosis, which of the following statements best describes how your oncologist  
12  
13 explained your child’s treatment plan”, with response options including “He/she gave me  
14  
15 different options and I chose what was best”, “He/she gave me different options and he/she told  
16  
17 me what was best”, and “He/she gave me only one option”.

18  
19  
20  
21  
22  
23  
24 Decisional regret was assessed using a modified version of the Decisional Regret Scale,[14,15]  
25  
26 which asked participants to state whether they “strongly agreed”, “slightly agreed”, or  
27  
28 “disagreed” with each of the following statements: “I have made the right decisions”, “I regret  
29  
30 the choices that were made”, “I would make the same choices if I had to do it all over again”,  
31  
32 “The decisions were wise”, and “The choices did my child a lot of harm”.

33  
34  
35  
36  
37  
38 The qualitative component of the study involved three audio-recorded sessions for each  
39  
40 participating family (60 sessions total). At UNOP, the standard diagnostic procedure includes an  
41  
42 intake conversation with a psychologist, followed by an initial diagnostic conversation with the  
43  
44 oncologist about diagnosis and treatment plans for which the psychologist is also present. These  
45  
46 two conversations were audio recorded as they naturally occurred, and one parent from each  
47  
48 participating family was subsequently interviewed. Semi-structured interviews explored parents’  
49  
50 communication perspectives and experiences, including the process for decision-making at  
51  
52 UNOP and parental reflections. All audio recordings were professionally transcribed and  
53  
54  
55  
56  
57  
58  
59  
60

1  
2  
3 translated into English with review by bilingual members of the research team to ensure adequate  
4 capture of original content.  
5  
6  
7  
8  
9

10 Complete survey and interview script are included as **supplementary materials**.  
11  
12  
13

#### 14 Data analysis

15  
16  
17  
18  
19 Quantitative data including sociodemographic information and items pertaining to decision-  
20 making were analyzed descriptively. Proportions between groups were compared using Chi-  
21 square or Fisher's exact test as appropriate. Parent responses regarding their preferred decision-  
22 making role was compared to the actual role they played. Parents whose preferences matched  
23 their experiences were considered to have held their preferred role and were compared to parents  
24 whose experiences did not match their preferences. Univariate logistic regression was used to  
25 assess the impact of sociodemographic characteristics on "preferred" versus "non-preferred" role  
26 in decision-making. A decisional regret score was calculated based on previously reported  
27 methods. [15] Because our final scale used 3 rather than 5 response options based on findings  
28 during pilot testing ("disagree", "slightly agree", "strongly agree"), points were assigned with a  
29 scale of 1, 3, and 5 with reverse scoring where appropriate, in which a score of 1 indicated the  
30 least regret and 5 indicated the most regret. Scores were decreased by 1 point and multiplied by  
31 25 for a score range of 0 to 100. Consistent with existing literature,[15] scores of 0 were  
32 categorized as no regret, 1-25 as mild regret, and >25 as heightened regret. Univariate logistic  
33 regression was performed with sociodemographic variables as well as "preferred" versus "non-  
34 preferred" role in decision-making.  
35  
36  
37  
38  
39  
40  
41  
42  
43  
44  
45  
46  
47  
48  
49  
50  
51  
52  
53  
54  
55  
56  
57  
58  
59  
60

1  
2  
3  
4  
5 Analysis of qualitative data was conducted by two independent coders who conducted thematic  
6 content analysis [16] on all transcripts utilizing a combination of *a priori* [17,18] and novel  
7 codes. Interrater reliability ranged from 0.72-0.88. Novel codes were identified based on  
8 recurrent themes by two authors who iteratively read transcripts. Conceptual definitions were  
9 refined through memo writing and initial coding of 12 transcripts. The final codebook is included  
10 as **supplementary material**. Codes related to decision-making included those identifying the  
11 decision-maker, the type of decision, and the reasons behind decision-making. Codes related to  
12 shared decision making at the cancer center included those expressed by providers and  
13 reflections from parents. MAXQDA (VERBI, Berlin, Germany) was utilized for data  
14 management. The Consolidated Criteria for Reporting Qualitative Studies guidelines were  
15 followed. [19]  
16  
17  
18  
19  
20  
21  
22  
23  
24  
25  
26  
27  
28  
29  
30  
31  
32

### 33 Patient and public involvement

34  
35  
36  
37 Neither patients, parents, nor the public were involved in the design of this research. Parents  
38 were involved in piloting the survey and we plan to involve parents further as we disseminate  
39 these results and consider interventional work.  
40  
41  
42  
43  
44  
45  
46

## 47 **Results**

### 48 Participant Characteristics

49  
50  
51  
52  
53  
54  
55  
56  
57  
58  
59  
60



1  
2  
3 Demographic characteristics of participants from each sample and their children are included in  
4  
5 Table 1. Most included participants in both samples were Spanish-speaking mothers who  
6  
7 identified as either Catholic or Evangelical. A range of pediatric ages and cancer diagnoses were  
8  
9 included.  
10

### 11 12 13 14 15 Parental decision-making

16  
17  
18  
19 Most Guatemalan parents surveyed (80%) made household decisions with the child's other  
20  
21 parent, and 70% made decisions about their child's cancer care this way. In interviews, parents  
22  
23 described sharing decision-making with their partners. One parent of an child with blood cancer  
24  
25 said, *"I talk to my wife and we agree on a middle point...the decisions are made by my wife and*  
26  
27 *me"*; a parent of another child with blood cancer similarly described how she made decisions  
28  
29 *"with my husband, because we are a couple"*. While many interviewed parents listened to advice  
30  
31 from extended family or community members, they emphasized the parental unit as the ultimate  
32  
33 decision maker: *"We have to talk, ask people with experience, and then we decide"*(parent of a  
34  
35 teenager with lymphoma). Amongst surveyed parents, almost all (94%) reported making  
36  
37 decisions without input from their community, and most (76%) made decisions without input  
38  
39 from religious or spiritual leaders.  
40  
41  
42  
43  
44  
45  
46

47 In describing how they ultimately made decisions around cancer care and treatment during  
48  
49 interviews, parents prioritized the health and survival of their children. One parent said, *"For the*  
50  
51 *sake of my baby, we're going to do everything in our power to cure her"* (parent of a child with  
52  
53 blood cancer). Other parents described sacrifices they were making, or were willing to make, in  
54  
55  
56  
57  
58  
59  
60

1  
2  
3 order to get their child appropriate care: *“If I must give her my heart, my kidney, I’d give it to her*  
4 *so she won’t die. I already lived; she’s starting to live. I tell her if I must die for you to be cured,*  
5 *I’ll do it”*(parent of a teenager with a brain tumor).  
6  
7  
8  
9

### 10 11 12 Decision-making with the oncologist 13

14  
15  
16  
17 When asked about their preferred role in decision-making with respect to the oncologist, most  
18 Guatemalan parents (76% of those surveyed) wanted to share decision-making with their child’s  
19 oncologist. Of those that did not, 20% preferred that the oncologist made most of the decisions,  
20 while 4% preferred to make treatment decisions themselves. However, a majority of parents  
21 either slightly (21%) or strongly (47%) agreed that they would rather have their medical team  
22 make decisions about what was best than provide a lot of choices; 31% disagreed. When asked  
23 about their experiences during the decision-making process, only a few surveyed parents (4%)  
24 said the oncologist provided them with options and they chose; the rest reported that they were  
25 either given options and said the oncologist told them which was best (48%) or were not  
26 provided options (48%).  
27  
28  
29  
30  
31  
32  
33  
34  
35  
36  
37  
38  
39  
40  
41

42 Qualitative data reflected a model of decision-making that emphasized honesty and trust in the  
43 medical team. Psychologists set the tone during initial conversations, highlighting a team  
44 approach to care and including parents as part of this team. One psychologist said to the parents  
45 of a child with blood cancer: *“I know it’s hard to trust in strangers, but you can ask all mothers*  
46 *here at the hospital, we are a team along with the parents...we don’t hide information.”* Another  
47 emphasized honesty, as she spoke to the parents of a child newly diagnosed with blood cancer,  
48  
49  
50  
51  
52  
53  
54  
55  
56  
57  
58  
59  
60

1  
2  
3 saying, “we will always tell you the truth, even if the truth is hard.” These messages were  
4  
5 reinforced almost verbatim in diagnostic conversations with the oncologists: “We promise we  
6  
7 will always tell you the truth. Even if the information is bad, we will tell you, we will never hide  
8  
9 information” (oncologist to the same parents).  
10  
11  
12  
13

14  
15 However, when psychologists and oncologists talked about treatment, they emphasized the  
16  
17 importance of starting immediately, using words like “must” and phrases such as “have to”,  
18  
19 without providing parents with multiple options. These directives referred to treatment  
20  
21 modalities, such as surgery or chemotherapy, necessity of hospitalization, and importance of  
22  
23 follow-up appointments. Table 2 includes additional quotations that demonstrate the tone around  
24  
25 decision-making set by psychologists and oncologists at UNOP.  
26  
27  
28  
29

30  
31 Guatemalan parents accepted this model, expressing trust in their medical teams and deference to  
32  
33 their providers. A parent of a teenager newly diagnosed with blood cancer directly told the  
34  
35 oncologist, “Whatever you say, you decide”. Another parent described in an interview: “We  
36  
37 didn’t know if it was the best, but that’s like when you wear an outfit – I just wear it – it doesn’t  
38  
39 matter if it’s pretty or not” (parent of a child with blood cancer). Parents also referred to the  
40  
41 expertise of their medical team, one saying, “the best specialists are here, this is why I’m here”  
42  
43 (parent of a teenager with a solid tumor) and another, “I didn’t ask much; the experts know the  
44  
45 solution” (parent of a child with blood cancer).  
46  
47  
48  
49  
50

### 51 Reflections on decision-making

52  
53  
54  
55  
56  
57  
58  
59  
60

Two-thirds of surveyed parents (65%) held their preferred role in decision-making around their child's cancer care, while 23% had a more active role than desired and 11% had a less active role than desired. Fathers were more likely to hold their preferred role in decision-making than mothers (OR 4.32 [95% CI 1.17-15.89],  $p=0.02$ ) (Table 3).

Most parents (64%) were categorized as having no decisional regret, while 25% had mild regret, and 11% had heightened regret. Heightened decisional regret did not significantly correlate with any sociodemographic variables, or with parents having played their preferred role in decision making (OR 1.34 [95% CI 0.32-5.56,  $p=0.68$ ) (Table 4). Parents in the qualitative sample predominantly expressed gratitude ("*we are grateful for this treatment*" (parent of a child with blood cancer)), peace ("*I'm a little bit more calmed*" (parent of a child with blood cancer)); "*here we feel more relaxed*" (parent of a child with blood cancer), and relief ("*They told me this was a good hospital; I felt relief*" (parent of an child with blood cancer)) as they reflected on decisions they had made.

## Discussion

The majority of Guatemalan parents included in this study valued shared decision-making, both with the child's other parent and with their child's oncologist. Providers at UNOP emphasized a decision-making model in which trust and honesty were prioritized. Parents deferred to their providers and were predominantly satisfied with the care they received. Ultimately, most parents felt they had made the right decisions, however, 11% experienced heightened decisional regret.

1  
2  
3 There are many approaches to decision-making in pediatric cancer care. [20] In high-income  
4 Western contexts, shared decision-making has been prioritized. [21] While different definitions  
5 of shared decision-making exist, it is often presented in contrast to paternalism and generally  
6 emphasizes autonomy, [22] multiple options, [23] and two-way information-exchange.[24]  
7  
8 Approximately three out of every four Guatemalan parents in our study reported that they  
9 preferred to share decision-making with their oncologists, however a similar proportion (69%)  
10 ultimately wanted their medical team to decide what was best rather than provide multiple  
11 options without a clear recommendation. These preferences are consistent with the decision-  
12 making process noted in diagnostic conversations recorded at UNOP, after which most parents  
13 expressed satisfaction. The model of decision-making at UNOP prioritizes trust, honesty, and  
14 information-exchange but maintains a predominately unidirectional flow of information  
15 (provider to parent) and does not include many choices. This model diverges from expectations  
16 for shared decision-making set forth by literature from high-income countries but is consistent  
17 with literature from other LMICs which describes an evolution in medical decision-making [25]  
18 with increasing prioritization of information-exchange [26] and autonomy over time.[27] These  
19 findings suggest there may be differences in cultural perceptions around shared decision-making,  
20 and shared decision-making may have different manifestations in different contexts.  
21  
22  
23  
24  
25  
26  
27  
28  
29  
30  
31  
32  
33  
34  
35  
36  
37  
38  
39  
40  
41  
42  
43

44 Parents in our study also predominantly reported sharing decisions about their child's care with  
45 the child's other parent, without significant input from their community. While there is limited  
46 literature on extended family or community involvement in decision-making for children with  
47 cancer, one study conducted in the UK demonstrated decisions were primarily made without  
48 involvement of individuals outside the nuclear family,[28] consistent with our findings from  
49  
50  
51  
52  
53  
54  
55  
56  
57  
58  
59  
60

1  
2  
3 Guatemala. However, approximately a quarter of parent participants in our study did describe  
4 consulting spiritual or religious advisors, emphasizing the importance of religion to this  
5 community. Previous work also suggests that although diagnosis is a one of the most stressful  
6 times for parents of children with cancer, it is a time when parents may feel most connected to  
7 one another.[29] It is possible that this emotional connection explains the shared parental  
8 decision-making we noted among partnered participants. However, it is also possible that  
9 sociocultural expectations, including patriarchal pressure, may influence decision-making in  
10 Guatemala. This study included more mothers than fathers, which is representative of caregivers  
11 at UNOP where mothers often attend visits while fathers remain in the community, working to  
12 support the family. Mothers at UNOP may feel obligated to discuss decisions about their child's  
13 care with the child's father, whose opinions carry more weight. In addition, we found that  
14 mothers were less likely than fathers to have their desired role in decision-making. While the  
15 percentage of parents (approximately one-third) who did not have their preferred role in  
16 decision-making is nearly identical to that seen in high-income countries, parents in Guatemala  
17 who did not have their desired decision-making role tended to have a more active role than  
18 desired, whereas those in the United States tended to have a more passive role than desired.[30]  
19 The desire of parents, and particularly mothers, to play a more passive role in decision-making  
20 may reflect cultural disempowerment, a theme that has been previously described in pediatric  
21 cancer communication in LMICs.[31,32]

22  
23  
24  
25  
26  
27  
28  
29  
30  
31  
32  
33  
34  
35  
36  
37  
38  
39  
40 Finally, parents included in this study report being primarily motivated by their child's health  
41 and well-being. This is consistent with the "good-parent" belief, [33] a concept which has been  
42 extensively studied in high-income settings [34] and includes "unselfish decisions in the child's  
43  
44  
45  
46  
47  
48  
49  
50  
51  
52  
53  
54  
55  
56  
57  
58  
59  
60

1  
2  
3 best interest”.<sup>[33]</sup> Most parents were satisfied with their decisions, however the small but  
4  
5 relevant number of parents (11%) who experienced heightened decisional regret emphasizes the  
6  
7 weight of cancer-related decisions and the importance of ongoing support. These findings  
8  
9 reinforce the importance of exploring parental preferences for cancer communication and  
10  
11 prioritizing individual familial needs, which may or may not be influenced by culture.  
12  
13  
14  
15  
16

17 This mixed-methods study allowed us to evaluate decision-making among Guatemalan parents  
18  
19 of children with cancer, including a deep exploration of motivating factors and the decision-  
20  
21 making process at UNOP. However, there are several limitations that should be considered. To  
22  
23 reduce burden on participants, our study design included separate qualitative and quantitative  
24  
25 samples which limited convergent analysis. This study focused specifically on decision-making  
26  
27 at diagnosis, and thus does not address potential shifts in decision-making preferences or  
28  
29 experiences over the cancer care continuum. In addition, this study was conducted at a single  
30  
31 cancer center in one small middle-income country. This was an initial step toward exploring  
32  
33 diagnostic communication and decision-making in LMICs and allowed for comparison to  
34  
35 literature from high-income settings, but further research is needed to determine if these findings  
36  
37 are applicable beyond Guatemala. Moreover, Guatemala itself is a diverse country. Our study  
38  
39 was conducted exclusively in Spanish and thus we were unable to include parents who were not  
40  
41 proficient in Spanish. Finally, because most parents included in our study had positive reflections  
42  
43 on their decisions, we were limited in our ability to analyze the small proportion of parents who  
44  
45 did experience regret. This is an opportunity for future research.  
46  
47  
48  
49  
50  
51  
52  
53

#### 54 Conclusion:

55  
56  
57  
58  
59  
60

1  
2  
3  
4  
5 Almost all prior work on decision-making in pediatric cancer care has been conducted  
6  
7 exclusively in high-income settings including the United States and Europe.[35] This study  
8  
9 demonstrates that many parents in Guatemala, like those in the United States, want to be engaged  
10  
11 in decision-making by their oncology teams and prioritize their child's well-being. However,  
12  
13 shared-decision making manifests differently in the Guatemalan context and differs from  
14  
15 previous definitions, most of which come from high-resourced settings. These findings suggest  
16  
17 ways in which culture may influence priorities for communication and care. Ultimately, this  
18  
19 work further supports developing the provider-parent relationship in all settings by encouraging  
20  
21 clinicians to routinely ask parents what role they want to play in decision-making and honor their  
22  
23 responses.  
24  
25  
26  
27  
28  
29  
30  
31  
32  
33  
34  
35  
36  
37  
38  
39  
40  
41  
42  
43  
44  
45  
46  
47  
48  
49  
50  
51  
52  
53  
54  
55  
56  
57  
58  
59  
60



## References

1. Kehl KL, Landrum MB, Arora NK, et al. Association of actual and preferred decision roles with patient-reported quality of care: Shared decision making in cancer care. *JAMA Oncology*. 2015;1(1):50-58. doi:10.1001/jamaoncol.2014.112
2. Hinds PS, Oakes L, Furman W, et al. Decision making by parents and healthcare professionals when considering continued care for pediatric patients with cancer. *Oncol Nurs Forum*. 1997;24(9):1523-1528. Accessed June 7, 2021. <https://pubmed.ncbi.nlm.nih.gov/9348593/>
3. Sisk BA, Kang TI, Goldstein R, DuBois JM, Mack JW. Decisional burden among parents of children with cancer. *Cancer*. 2019;125(8):1365-1372. doi:10.1002/cncr.31939
4. Derrington SF, Paquette E, Johnson KA. Cross-cultural Interactions and Shared Decision-making. *Pediatrics*. 2018;142(Supplement 3):S187-S192. doi:10.1542/PEDS.2018-0516J
5. Mack JW, Wolfe J, Grier HE, Cleary PD, Weeks JC. Communication about prognosis between parents and physicians of children with cancer: Parent preferences and the impact of prognostic information. *Journal of Clinical Oncology*. 2006;24(33):5265-5270. doi:10.1200/JCO.2006.06.5326
6. Sisk BA, Kang TI, Mack JW. The evolution of regret: decision-making for parents of children with cancer. *Supportive Care in Cancer*. Published online June 20, 2019:1-8. doi:10.1007/s00520-019-04933-8
7. Charles C, Gafni A, Whelan T, O'Brien MA. Cultural influences on the physician-patient encounter: The case of shared treatment decision-making. *Patient Education and Counseling*. 2006;63(3):262-267. doi:10.1016/J.PEC.2006.06.018
8. Graetz DE, Garza M, Rodriguez-Galindo C, Mack JW. Pediatric cancer communication in low- and middle-income countries: A scoping review. *Cancer*. Published online September 29, 2020:cncr.33222. doi:10.1002/cncr.33222
9. Ward ZJ, Yeh JM, Bhakta N, Frazier AL, Atun R. Estimating the total incidence of global childhood cancer: a simulation-based analysis. *The Lancet Oncology*. 2019;20(4):483-493. doi:10.1016/S1470-2045(18)30909-4
10. Ribeiro RC, Antillon F, Pedrosa F, Pui CH. Global pediatric oncology: Lessons from partnerships between high-income countries and low- to mid-income countries. *Journal of Clinical Oncology*. 2016;34(1):53-61. doi:10.1200/JCO.2015.61.9148
11. Palinkas LA, Horwitz SM, Green CA, et al. Purposeful sampling for qualitative data collection and analysis in mixed method implementation research. *Adm Policy Ment Health*. Published online 2015. doi:10.1007/s10488-013-0528-y.Purposeful
12. Saunders B, Sim J, Kingstone T, et al. Saturation in qualitative research: exploring its conceptualization and operationalization. *Quality and Quantity*. 2018;52(4):1893-1907. doi:10.1007/s11135-017-0574-8
13. Elwyn G, Edwards A, Wensing M, et al. *Shared Decision Making Measurement Using the OPTION Instrument*. Accessed September 19, 2018. [http://www.glynelwyn.com/uploads/2/4/0/4/24040341/option\\_12\\_book.pdf](http://www.glynelwyn.com/uploads/2/4/0/4/24040341/option_12_book.pdf)
14. Brehaut JC, O'connor AM, Wood TJ, et al. Validation of a Decision Regret Scale. doi:10.1177/0272989X03256005
15. Mack JW, Cronin AM, Kang TI. Decisional regret among parents of children with cancer. *Journal of Clinical Oncology*. 2016;34(33):4023-4029. doi:10.1200/JCO.2016.69.1634
16. Elo S, Kyngäs H. The qualitative content analysis process. *Journal of Advanced Nursing*. 2008;62(1):107-115. doi:10.1111/j.1365-2648.2007.04569.x

17. Roter D, Larson S. The Roter interaction analysis system (RIAS): Utility and flexibility for analysis of medical interactions. *Patient Education and Counseling*. 2002;46(4):243-251. doi:10.1016/S0738-3991(02)00012-5
18. Street RL. Article in *Health Communication*. Published online 2001. doi:10.1207/S15327027HC1301\_06
19. Tong A, Sainsbury P, Craig J. Consolidated criteria for reporting qualitative research (COREQ): a 32-item checklist for interviews and focus groups. *International Journal for Quality in Health Care*. 2007;19(6):349-357. doi:10.1093/intqhc/mzm042
20. Sung L, Regier DA. Decision making in pediatric oncology: Evaluation and incorporation of patient and parent preferences. *Pediatric Blood and Cancer*. 2013;60(4):558-563. doi:10.1002/pbc.24450
21. Mercurio MR, Forman EN, Ladd RE, Maxwell MA, Ross LF, Silber TJ. American academy of pediatrics policy statements on bioethics: Summaries and commentaries: Part 3. *Pediatrics in Review*. 2008;29(5). doi:10.1542/pir.29-5-e28
22. Elwyn G, Frosch D, Thomson R, et al. Shared Decision Making: A Model for Clinical Practice. *Journal of General Internal Medicine*. 2012;27(10):1361-1367. doi:10.1007/s11606-012-2077-6
23. Boland L, Graham ID, Légaré F, et al. Barriers and facilitators of pediatric shared decision-making: A systematic review. *Implementation Science*. 2019;14(1):1-25. doi:10.1186/s13012-018-0851-5
24. Charles C, Gafni A, Whelan T. Decision-making in the physician-patient encounter: revisiting the shared treatment decision-making model. *Social Science & Medicine*. 1999;49(5):651-661. doi:10.1016/S0277-9536(99)00145-8
25. Vučemilović M, Mahmić-Kaknjo M, Pavličević I. Transition from paternalism to shared decision making - a review of the educational environment in Bosnia and Herzegovina and Croatia. *Acta Med Acad*. 2016;45(1):61-69. doi:10.5644/ama2006-124.157
26. Kilicarslan-Toruner E, Akgun-Citak E. Information-seeking behaviours and decision-making process of parents of children with cancer. *European Journal of Oncology Nursing*. 2013;17(2):176-183. doi:10.1016/j.ejon.2012.03.001
27. Cicero-Oneto CE, Valdez-Martinez E, Bedolla M. Decision-making on therapeutic futility in Mexican adolescents with cancer: A qualitative study. *BMC Medical Ethics*. 2017;18(1). doi:10.1186/s12910-017-0231-8
28. McKenna K, Blake H. Parental involvement in paediatric cancer treatment decisions. *European Journal of Cancer Care*. 2010;19:621-630. doi:10.1111/j.1365-2354.2009.01116.x
29. Wiener L, Battles H, Zadeh S, Pelletier W, Arruda-Colli M, Muriel A. The perceived influence of childhood cancer on the parents' relationship HHS Public Access. *Psychooncology*. 2017;26(12):2109-2117. doi:10.1002/pon.4313
30. Mack JW, Wolfe J, Cook EF, Grier HE, Cleary PD, Weeks JC. Parents' Roles in Decision Making for Children With Cancer in the First Year of Cancer Treatment. *Journal of Clinical Oncology*. 2011;29(15):2085-2090. doi:10.1200/JCO.2010.32.0507
31. Kohlsdorf M, Luiz Á, Junior C. Associations between clinical and sociodemographic data and patterns of communication in pediatric oncology. Published online 2016. doi:10.1186/s41155-016-0028-6
32. Renner LA, McGill D. Exploring factors influencing health-seeking decisions and retention in childhood cancer treatment programmes: perspectives of parents in Ghana. *Ghana Med J*. 2016;50(3):149-156.

- 1  
2  
3 33. Hinds PS, Oakes LL, Hicks J, et al. "Trying to be a good parent" as defined by interviews with  
4 parents who made phase I, terminal care, and resuscitation decisions for their children. *Journal*  
5 *of Clinical Oncology*. 2009;27(35):5979-5985. doi:10.1200/JCO.2008.20.0204  
6  
7 34. Weaver MS, October T, October T, et al. "Good-Parent Beliefs": Research, concept, and clinical  
8 practice. *Pediatrics*. 2020;145(6). doi:10.1542/peds.2019-4018  
9  
10 35. Sisk BA, Mack JW, Ashworth R, DuBois J. Communication in pediatric oncology: State of the  
11 field and research agenda. *Pediatric Blood & Cancer*. 2017;(June 2017):e26727.  
12 doi:10.1002/pbc.26727  
13  
14  
15  
16  
17  
18  
19  
20  
21  
22  
23  
24  
25  
26  
27  
28  
29  
30  
31  
32  
33  
34  
35  
36  
37  
38  
39  
40  
41  
42  
43  
44  
45  
46  
47  
48  
49  
50  
51  
52  
53  
54  
55  
56  
57  
58  
59  
60

**Table 1. Sociodemographic characteristics of participating caregivers and their children**

|                                              | <b>Quantitative sample<br/>(total = 100)</b> | <b>Qualitative sample<br/>(total = 20)</b> |
|----------------------------------------------|----------------------------------------------|--------------------------------------------|
| <b>Participant</b>                           | <b>N (%)</b>                                 | <b>N (%)</b>                               |
| <b>Relationship to patient</b>               |                                              |                                            |
| Mother                                       | 76 (76%)                                     | 13 (65%)                                   |
| Father                                       | 22 (22%)                                     | 7 (35%)                                    |
| Grandparent                                  | 1 (1%)                                       | 0 (0%)                                     |
| Sibling                                      | 1 (1%)                                       | 0 (0%)                                     |
| <b>Gender</b>                                |                                              |                                            |
| Male                                         | 23 (23%)                                     | 7 (35%)                                    |
| Female                                       | 77 (77%)                                     | 13 (65%)                                   |
| <b>Primary language</b>                      |                                              |                                            |
| Spanish (only)                               | 73 (73%)                                     | 13 (65%)                                   |
| Spanish and English                          | 2 (2%)                                       | 0 (0%)                                     |
| Spanish and Mayan dialect                    | 24 (24%)                                     | 7 (35%)                                    |
| Mayan dialect (only)                         | 1 (1%)                                       | 0 (0%)                                     |
| <b>Ethnicity*</b>                            |                                              | Data not collected                         |
| Ladino                                       | 55 (56%)                                     |                                            |
| Indigenous (Mayan)                           | 25 (25%)                                     |                                            |
| Mixed race                                   | 19 (19%)                                     |                                            |
| <b>Religion</b>                              |                                              |                                            |
| Catholic                                     | 41 (41%)                                     | 4 (20%)                                    |
| Evangelical                                  | 52 (52%)                                     | 13 (65%)                                   |
| Other identified religion                    | 3 (3%)                                       | 2 (10%)                                    |
| No religion                                  | 4 (4%)                                       | 1 (5)                                      |
| <b>Civil status*</b>                         |                                              |                                            |
| Married                                      | 59 (60%)                                     | 13 (65%)                                   |
| United (living together as if married)       | 25 (25%)                                     | 6 (30%)                                    |
| Separated                                    | 1 (1%)                                       | 0 (0%)                                     |
| Divorced                                     | 10 (10%)                                     | 1 (5%)                                     |
| Single                                       | 4 (4%)                                       | 0 (0%)                                     |
| <b>Monthly household income (Quetzales)*</b> |                                              | Data not collected                         |
| <2000                                        | 36 (37%)                                     |                                            |
| 2000-2999                                    | 23 (23%)                                     |                                            |
| >2999                                        | 39 (40%)                                     |                                            |
| <b>Patient</b>                               |                                              |                                            |
| <b>Age (years)</b>                           |                                              |                                            |
| 0-5                                          | 38 (38%)                                     | 6 (30%)                                    |
| 6-10                                         | 19 (19%)                                     | 6 (30%)                                    |
| 11-15                                        | 31 (31%)                                     | 4 (20%)                                    |
| 16-18                                        | 12 (12%)                                     | 4 (20%)                                    |
| <b>Gender</b>                                |                                              |                                            |
| Male                                         | 61 (61%)                                     | 11 (55%)                                   |
| Female                                       | 39 (39%)                                     | 9 (45%)                                    |

| Diagnosis             |          |          |
|-----------------------|----------|----------|
| Leukemia              | 58 (58%) | 13 (65%) |
| Lymphoma              | 12 (12%) | 2 (10%)  |
| Histiocytic disorders | 2 (2%)   | 1 (5%)   |
| Solid tumor           | 25 (25%) | 3 (15%)  |
| Brain tumor           | 3 (3%)   | 1 (5%)   |

\* Ethnicity: 1 missing; Civil status: 1 missing; Monthly household income (Quetzales): 2 missing

For peer review only

**Table 2. Excerpts from recorded diagnostic conversations emphasizing teamwork and honesty over autonomy**

| Theme                 | Psychologists speaking to parents during intake                                                                                                                                                                                                                                                                                                                                                                                                             | Oncologists speaking to parents in diagnostic conversations                                                                                                                                                                                                                                                                                                                                                                                                                                                                               |
|-----------------------|-------------------------------------------------------------------------------------------------------------------------------------------------------------------------------------------------------------------------------------------------------------------------------------------------------------------------------------------------------------------------------------------------------------------------------------------------------------|-------------------------------------------------------------------------------------------------------------------------------------------------------------------------------------------------------------------------------------------------------------------------------------------------------------------------------------------------------------------------------------------------------------------------------------------------------------------------------------------------------------------------------------------|
| <b>Teamwork</b>       | <p><i>“You see we are all a team.”</i> (to parents of an child with blood cancer)</p> <p><i>“I want you to know that we are a team and we will always tell the truth.”</i> (to parents of a child with a solid tumor)</p> <p><i>“In here, each doctor has his specialty...each of them in their own working area, but we are still a team.”</i> (to parents of a child with blood cancer)</p>                                                               | <p><i>“We want to remark that we are a team...and we are all here to support you. We are a big team so one of us will be ready to answer all your questions. No matter if it’s good or bad, you deserve to know it.”</i> (to parents of a child with blood cancer)</p> <p><i>“We are a lot of people that work for all children’s recovery...There’s a huge hope and you have the entire medical staff and the hospital staff next to you, working together to make [your son] better.”</i> (to parents of a child with blood cancer)</p> |
| <b>Honesty</b>        | <p><i>“We will be very honest with you; we won’t lie to you...Anything that comes up, I’ll let you know”</i> (to parents of a child with a solid tumor)</p> <p><i>“I know no one likes bad news, but as a parent you deserve the truth...Like I told you, doctors will be very honest with you.”</i> (to parents of a teenager with brain cancer)</p> <p><i>“Here, they will always tell you everything.”</i> (to parents of a child with blood cancer)</p> | <p><i>“Another important thing. We are always going to be very honest with you, if anything comes up, we will seat down with you and talk to you.”</i> (to parents of a teenager with blood cancer)</p> <p><i>“We won’t lie to you, of course it’s going to be hard, this is going to feel like a roller coaster, there will be good days and there will be hard days, but we will be with you on good days and hard days.”</i> (to parents of a teenager with blood cancer)</p>                                                          |
| <b>Lack of choice</b> | <p><i>“What we definitely have to do is surgery, that’s essential to cure this type of cancer.”</i> (to parents of a child with a solid tumor)</p> <p><i>“Therefore, is so important that once we detect it, we must give treatment immediately.”</i> (to parents of a child with blood cancer)</p> <p><i>“With these, the only treatment is surgery...If we want to save [your son], we must perform the surgery.”</i></p>                                 | <p><i>“Unfortunately, he must stay here for now, but after a while he’ll be able to go home for some time or to the shelter.”</i> (to parents of a child with blood cancer)</p> <p><i>“It’s going to be difficult, because I’m not telling you it’s going to be easy or that don’t have to make sacrifices, but if you want to see [your daughter] cured, just like us, this is the road we must follow.”</i> (to parents of a child with blood cancer)</p>                                                                               |

|  |                                               |  |
|--|-----------------------------------------------|--|
|  | (to parents of a teenager with a solid tumor) |  |
|--|-----------------------------------------------|--|

For peer review only

**Table 3. Univariate logistic regression analysis of sociodemographic factors and preferred decision-making role**

| <b>Decision-Making</b>                             |                |                     |
|----------------------------------------------------|----------------|---------------------|
| <b>Factor</b>                                      | <b>P-Value</b> | <b>Odds Ratio</b>   |
| <b>Parent (N=96)</b>                               | 0.02*          |                     |
| <b>Father</b>                                      |                | 4.32 (1.17 - 15.89) |
| <b>Mother</b>                                      |                | 1.00 (Ref)          |
| <b>Ethnicity (N=97)</b>                            | 0.70           |                     |
| <b>Ladino</b>                                      |                | 1.49 (0.51 - 4.36)  |
| <b>Indigenous (Mayan)</b>                          |                | 1.66 (0.47 - 5.93)  |
| <b>Mixed race</b>                                  |                | 1.00 (Ref)          |
| <b>Monthly household Income (Quetzales) (N=96)</b> | 0.60           |                     |
| <b>&lt;2000</b>                                    |                | 1.00 (Ref)          |
| <b>2000-2999</b>                                   |                | 1.43 (0.46 - 4.39 ) |
| <b>&gt;2999</b>                                    |                | 1.61 (0.62 - 4.15 ) |
| <b>Diagnosis group (N=98)</b>                      | 0.12           |                     |
| <b>Leukemia</b>                                    |                | 1.00 (Ref)          |
| <b>Lymphoma</b>                                    |                | 8.25 (1.00 - 68.35) |
| <b>Solid tumor</b>                                 |                | 1.59 (0.59 - 4.30)  |
| <b>Others (Histiocytic disorder + Brain tumor)</b> |                | 3.00 (0.31 - 28.59) |

\*significant p-value



**Table 4. Univariate logistic regression analysis of heightened decisional regret**

| <b>Decisional regret</b>                                             |                |                     |
|----------------------------------------------------------------------|----------------|---------------------|
| <b>Factor</b>                                                        | <b>P-Value</b> | <b>Odds Ratio</b>   |
| <b>Parent (N=98)</b>                                                 | 0.68           |                     |
| <b>Father</b>                                                        |                | 1.34 (0.32 - 5.56)  |
| <b>Mother</b>                                                        |                | 1.00 (Ref)          |
| <b>Ethnicity (N=99)</b>                                              | 0.16           |                     |
| <b>Ladino</b>                                                        |                | 1.41 (0.15 - 13.48) |
| <b>Indigenous (Mayan)</b>                                            |                | 4.50 (0.48 - 42.25) |
| <b>Mixed race</b>                                                    |                | 1.00 (Ref)          |
| <b>Monthly household Income (Quetzales) (N=98)</b>                   | 0.27           |                     |
| <b>&lt;2000</b>                                                      |                | 1.00 (Ref)          |
| <b>2000-2999</b>                                                     |                | 0.75 (0.17 - 3.35)  |
| <b>&gt;2999</b>                                                      |                | 0.27 (0.05 - 1.44)  |
| <b>Diagnosis group (N=100)</b>                                       | 0.57           |                     |
| <b>Leukemia</b>                                                      |                | 1.00 (Ref)          |
| <b>Lymphoma</b>                                                      |                | 0.57 (0.06 - 5.02)  |
| <b>Others<br/>(Brain tumor + Histiocytic disorder + Solid tumor)</b> |                | 0.45 (0.09 - 2.25)  |
| <b>Decision Engagement (N=98)</b>                                    | 0.71           |                     |
| <b>Preferred</b>                                                     |                | 0.78 (0.20 - 2.96)  |
| <b>Not preferred</b>                                                 |                | 1.00 (Ref)          |

## Supplemental Material

### Cancer Treatment Decision-Making among Parents of Pediatric Oncology Patients in Guatemala

Dylan E. Graetz MD MPH, Silvia Elena Rivas MD, Huiqi Wang MS, Yuvanesh Vedaraju MS, Gia Ferrara MSGH, Ana Lucia Fuentes, Ana Caceres-Serrano PhD, Federico Antillon-Klussmann MD PhD, Meenakshi Devidas PhD MBA, Monika L. Metzger MD MS, Carlos Rodriguez-Galindo MD, Jennifer W. Mack MD MPH

| Section         | Page  |
|-----------------|-------|
| Interview Guide | 2-3   |
| Survey          | 4-17  |
| Codebook        | 18-20 |

## 1. Interview Guide

1. Tell me about your experience at UNOP.
  - a. Who told you to come?... how did you get here?... when did you arrive?... What happened next...?
    - i. Where did you stay while your child was being diagnosed?
    - ii. Who came to the visits?
    - iii. Who visited you while you were here?
    - iv. Who did you meet with?
    - v. What testing was done?
2. Before your child was diagnosed, what did cancer mean to you? What had you heard about cancer?
  - a. Did you know anyone with cancer?
  - b. How do people in your community think about cancer?
  - c. Had you heard the word before? How did you first hear it/learn about it?
3. Tell me, did you go to another hospital or receive treatment anywhere before you came to UNOP?
  - a. If so, where?
  - b. What did they tell you about your child and his/her illness?
  - c. Did you try any medicines or remedies before coming to UNOP?
    - i. What happened with these?
4. At the time your child was diagnosed at UNOP, who explained cancer to you?
  - a. How did they explain it?
  - b. How was that similar to what you already understood/believed about cancer?
  - c. How was it different to what you understood/believed about cancer?
  - d. Did you talk to the team about these similarities/differences? Were all of your questions answered/addressed?
  - e. How does this relate to your other experiences with illness?
    - i. How is it similar/different?
5. What is your understanding of cancer now?
  - a. How did you reach this understanding?
  - b. Is this similar to or different from what your family thinks about cancer?
  - c. Is it similar to or different from what others in your community think about cancer?
  - d. Is it similar to or different from what the doctors and nurses think?
  - e. Do you still have questions or concerns?
6. Tell me about how you usually make important decisions in your family/community.
  - a. There are lots of decisions a family has to make, for example, some families have to make decisions about how to spend money or whether their children will work or go to school. Who is responsible for making decisions in your family?
    - i. Are there others who have input in decisions?
    - ii. What is your level of involvement in decisions? Would you say you are mostly responsible for decisions alone? Do you share that responsibility? With whom? Do you have more limited input?
  - b. How is this similar to or different from the way your family has made decisions about your child's cancer?
    - i. Who is responsible for coming to appointments with your child?
    - ii. How is information from those visits shared with others in your family? In your community?
    - iii. What do you need to help you make decisions about your child's diagnosis and treatment?

- 1  
2  
3  
4  
5  
6  
7  
8  
9  
10  
11  
12  
13  
14  
15  
16  
17  
18  
19  
20  
21  
22  
23  
24  
25  
26  
27  
28  
29  
30  
31  
32  
33  
34  
35  
36  
37  
38  
39  
40  
41  
42  
43  
44  
45  
46  
47  
48  
49  
50  
51  
52  
53  
54  
55  
56  
57  
58  
59  
60
- iv. Does your child have a say in decisions regarding his or her care?
  - v. Have there been disagreements about what to do for your child? Tell me more about those disagreements and how your family has handled that?
7. Now I would like to learn more about how you are feeling and what you are thinking about during this time, shortly after having a child diagnosed with cancer.
- a. Who supports you during this time?
  - b. What changes have you had to make to your life/family?
  - c. Have you felt supported by the team at UNOP? How, or how not? By whom?
  - d. What are you worried about during this time? How does the staff at UNOP address these worries?
  - e. What are you most hoping for during this time? How does the team at UNOP address these hopes?
  - f. As you think about these hopes and worries for your child, which ones stand out as being the most important to you?
  - g. How have your hopes and worries about other things in your life changed since having a child diagnosed with cancer?
8. If you had the opportunity now to speak with other parents of a child recently diagnosed with cancer, what would you tell them? What advice would you give them?

## 2. Survey

Instructions for the interviewer:

- When conducting this interview (starting with the section titled “Demographic questions”) read all lowercase text aloud to the respondent.
- Instructions for interviewers are provided throughout the questionnaire in capital letters. Words appearing in capital letters are meant to guide the interviewer and should NOT be read aloud.
- Read instructions written in lowercase letters aloud to the respondent to guide him/her in answering the question.
- It is important to read questions in their entirety, exactly as they are written
- Many of the questions have answer choices. It is important for the interviewer to read *all* the answer choices aloud to the respondent before pausing for a response.
- If the respondent does not understand the question, first the interviewer must repeat the whole question. For some questions, there is an alternative explanation that the interviewer can use if the respondent still does not understand the question. If, after repeating twice and using the alternative explanation (if provided), the respondent still does not understand, the interviewer can explain in a few additional words before moving on to the next question and leaving it unanswered.
- If the respondent’s answer is not clear, the interviewer should repeat all of the response options and wait for a clear answer.
- For the questions involving a scale, the scale should be handed to the respondent before the question is read. For each question, the interviewer must point out the options with his finger, for example show “strongly agree”, “slightly agree” and “disagree”. Then, the respondent must use his/her finger to indicate an option and the interviewer will record this choice on the survey.
- The interviewer will be expected to fill out the survey as it is read aloud. Circle the number corresponding to the answer chosen by the respondent. For fill-in or open text answers, write the appropriate information as stated by the respondent.
- It is important that the interviewer is familiar with the instrument before conducting the interviews.

- At the end of the interview, the interviewer should gather a copy of the corresponding patient's demographic sheet (completed by the social worker) and use the medical chart to find the corresponding answers for questions 7-13.

Introduction to the survey:

*Thank you very much for your time and your participation in our study. The purpose of the study is to learn about the experiences and preferences of parents of children with cancer. We hope that the results of this survey will help us better care for parents and children who come to our hospital in the future. Your answers will not affect your child's care, and your medical team will not know your answers to our questions. We would like to hear your opinions and we are not looking for a "correct" answer. Please, be honest with us. Also, since we are going to review the data all together and anonymously it is important that we gather some information about you that may seem obvious while we talk, such as your gender. Although that seems obvious to us now, it is important that I ask these things and that you answer me honestly. Thank you for your participation.*

peer review only

**Demographic questions** – Now we are going to ask you a few questions about yourself

1. What is your gender? [IF THEY DO NOT UNDERSTAND ASK: “Are you a...?”]

- Man  
 Woman

2. What is your relationship to the child?

- Parent  
 Sibling  
 Grandparent  
 Aunt/Uncle  
 Legal guardian  
 Other relative (*Please specify*)

3. What language do you speak at home?

*Choose all that apply*

- English  
 Spanish  
 K'che  
 Q'eqchi'  
 Kaqchikel  
 Mam  
 Poqomchi  
 Tz'utujil  
 Achi  
 Q'anjob'al  
 Ixil  
 Akatek  
 Jakalteq  
 Chuj  
 Poqomam  
 Ch'orti'  
 Awakatek

- Sakapultek  
 Sipakapa  
 Garifuna  
 USpantek  
 Tekitek  
 Mopan  
 Xincan  
 Itza  
 Other (*please specify*)

4. What ethnicity are you? *Choose all that apply.*

- White/Caucasian (European descent)  
 Mestizo  
 Quiché  
 Kaqchikel  
 Mam  
 Quekchí  
 Black Hispanic  
 Other (*please specify*) \_\_\_\_\_

5. What is your religion?

- Catholic  
 Evangelical  
 Other (*please specify*\_\_\_\_)  
 No religion

6. Do you believe in the Mayan spirituality?

- Yes  
 A little  
 No

1  
2  
3 **Medical information** – *Now we will ask a few questions about your child's illness and*  
4 *treatment*  
5

6  
7 7. What is the name of your child's diagnosis?  
8

9 8. Where in your child's body is the [USE THE WORD PARENT USED IN QUESTION  
10 #5] located?  
11

12 9. Has the [USE THE WORD PARENT USED IN QUESTION #5] spread to other places  
13 in the body?  
14

15  Yes

16  No  
17

18 10. How long will all of your child's treatment last? *Please check one.*

19  Less than 6 months

20  6 months to 1 year

21  More than 1 year, but less than 2 years

22  2 years or more  
23  
24

25 11. Which of the following will be part of the treatment of your child's cancer? *Please*  
26 *check all that apply.*

27  Chemotherapy

28  Surgery

29  Radiation treatment  
30  
31

32 12. What is **your** main goal of your child's cancer treatment? *Choose one.*

33  To cure my child's cancer

34  To help my child live longer

35  To decrease symptoms from the cancer  
36  
37

38 13. What is your understanding of **your medical team's** main goal of your child's  
39 cancer treatment? *Choose one.*

40  To cure my child's cancer

41  To help my child live longer

42  To decrease symptoms from the cancer  
43  
44  
45  
46  
47  
48  
49  
50  
51  
52  
53  
54  
55  
56  
57  
58  
59  
60



**Information Exchange** – Now we are going to ask you a few questions about how you learned about your child's illness, including what you think has caused your child's illness, and who/what information was most important, influential, or useful to you when he/she was diagnosed

14. Parents have different ideas about where cancer comes from and we would like to hear from you. How much do you think the following factors explain why your child got cancer?

|                              | <i>A lot</i>             | <i>A little</i>          | <i>Not at all</i>        |
|------------------------------|--------------------------|--------------------------|--------------------------|
| Caused by an infection       | <input type="checkbox"/> | <input type="checkbox"/> | <input type="checkbox"/> |
| Due to heat or cold          | <input type="checkbox"/> | <input type="checkbox"/> | <input type="checkbox"/> |
| Lacking hygiene or nutrition | <input type="checkbox"/> | <input type="checkbox"/> | <input type="checkbox"/> |
| Because of a sacred mission  | <input type="checkbox"/> | <input type="checkbox"/> | <input type="checkbox"/> |

How much do you think the following factors explain why your child got cancer?

|                                                                                              | <i>A lot</i>             | <i>A little</i>          | <i>Not at all</i>        |
|----------------------------------------------------------------------------------------------|--------------------------|--------------------------|--------------------------|
| Due to bad thoughts ( <i>malhecho</i> )                                                      | <input type="checkbox"/> | <input type="checkbox"/> | <input type="checkbox"/> |
| Sent by the devil ( <i>diabólico</i> )                                                       | <input type="checkbox"/> | <input type="checkbox"/> | <input type="checkbox"/> |
| Supernatural; originating from natural elements (e.g. waterfalls, mountains, wind, darkness) | <input type="checkbox"/> | <input type="checkbox"/> | <input type="checkbox"/> |

How much do you think the following factors explain why your child got cancer?

|                                                               | <i>A lot</i>             | <i>A little</i>          | <i>Not at all</i>        |
|---------------------------------------------------------------|--------------------------|--------------------------|--------------------------|
| Lack of respect for nature or the elements of the environment | <input type="checkbox"/> | <input type="checkbox"/> | <input type="checkbox"/> |
| Bad relationships with the community                          | <input type="checkbox"/> | <input type="checkbox"/> | <input type="checkbox"/> |
| Caused by God or another religious figure                     | <input type="checkbox"/> | <input type="checkbox"/> | <input type="checkbox"/> |

How much do you think the following factors explain why your child got cancer?

|                                             | <i>A lot</i>             | <i>A little</i>          | <i>Not at all</i>        |
|---------------------------------------------|--------------------------|--------------------------|--------------------------|
| Caused by uncontrol cell growth             | <input type="checkbox"/> | <input type="checkbox"/> | <input type="checkbox"/> |
| Caused by fear or surprise ( <i>susto</i> ) | <input type="checkbox"/> | <input type="checkbox"/> | <input type="checkbox"/> |
| Caused by medications                       | <input type="checkbox"/> | <input type="checkbox"/> | <input type="checkbox"/> |

1  
2  
3 15. Please look at this paper with different color circles. On the left, there are many  
4 green circles. These indicate something that you found very important. In the middle,  
5 there are just a few yellow circles. These represent something that for you was a little bit  
6 important. And on the right, after the red line, there are not any circles. This indicates  
7 something that wasn't important for you at all.  
8  
9

10 Please, show me with your finger how useful or important each of the following things  
11 was for you as a **source of information regarding your child's cancer**.  
12

- 13 • Conversations with your medical team at UNOP (including oncologists,  
14 psychologists, nurses, social workers)  
15
- 16 • Conversations within your community (for example, with neighbors,  
17 community leaders...)  
18
- 19 • Conversations with your family (siblings, grandparents, aunts, uncles)  
20  
21  
22

23 Please, show me with your finger how useful or important each of the following things  
24 was for you as a **source of information regarding your child's cancer**.  
25

- 26 • Conversations with leaders in your religious or spiritual community  
27
- 28 • An understanding within yourself (including a feeling, hunch or dream)  
29  
30
- 31 • Reading in books or looking for information on the internet  
32

33 16. Parents differ in the amount of information that they want to know about their child's  
34 *diagnosis and treatment*—some want to know everything, others want to know very  
35 little. What is your preference for details of information about your child's diagnosis and  
36 treatment? *Choose one*.  
37  
38

- 39  I want to hear as many details as possible in all situations relating to my child's  
40 cancer and its treatment.
- 41  I want to hear details only in certain situations, in other situations I do not want to  
42 hear the details
- 43  I prefer not to hear a lot of details.  
44  
45

46 17. How *important* is it to you to know about your child's likelihood of being cured?

- 47  It is very important for me to know the likelihood of cure
- 48  It is not very important for me to know the likelihood of cure
- 49  I prefer not to know the likelihood of cure  
50

51 18. How important is it to you to know about how likely it is that cancer or its treatment  
52 may affect your child's life in the future?

- 53  It is very important for me to know the likelihood this treatment affecting my child
- 54  It is not very important for me to know the likelihood this treatment affecting my child
- 55  I prefer not to know the likelihood this treatment affecting my child  
56  
57  
58  
59  
60

1  
2  
3 19. Now, using the same colored circles, we would like to ask you about your  
4 preferences regarding the **way** in which your medical team communicates. Remember  
5 that, on the left, there are many green circles, and these indicate something that is very  
6 important for you. In the middle there are a few yellow circles which represent  
7 something that is slightly important for you. On the right, after the red line, there are not  
8 any circles. This indicates something that is not important to you.  
9  
10

11  
12 We would like to know, how important is it to you that your doctors and other health  
13 professionals...  
14

- 15
- 16
- 17 • Explain things in a way I can understand
- 18
- 19 • Are open and honest with me
- 20
- 21
- 22 • Involve me in making decisions about my child's care
- 23
- 24 • Pay attention to my emotions and feelings
- 25

26 How important is it to you that your doctors and other health professionals...?  
27

- 28
- 29 • Help me deal with the things nobody knows related to my child's cancer
- 30
- 31 • Help me understand ways to take care of my child while I'm dealing with  
32 cancer
- 33
- 34
- 35
- 36 • Ask about my culture, background, and beliefs
- 37
- 38

39 20. At the time of diagnosis, did the doctor ask about your previous knowledge about  
40 cancer? *Choose one.*  
41

- 42  Yes
- 43  No
- 44
- 45
- 46

47 21. How often do you feel like you are given the information that is important to you  
48 without needing to ask for it? *Choose one.*  
49

- 50  Always
- 51  Sometimes
- 52  Never
- 53
- 54
- 55
- 56
- 57
- 58
- 59
- 60

1  
2  
3 22. When you see your child's doctor, how often do you have questions about your  
4 child's care that you want to discuss but do not? *Choose one.*

- 5  
6  Always  
7  Sometimes  
8  Never  
9

10  
11 [IF THE RESPONDENT DOES NOT UNDERSTAND ASK: When you have questions  
12 for your doctor, how often are you too afraid to ask them?  
13

- 14  Always  
15  Sometimes  
16  Never  
17  
18  
19  
20  
21  
22  
23  
24  
25  
26  
27  
28  
29  
30  
31  
32  
33  
34  
35  
36  
37  
38  
39  
40  
41  
42  
43  
44  
45  
46  
47  
48  
49  
50  
51  
52  
53  
54  
55  
56  
57  
58  
59  
60

For peer review only

1  
2  
3 **Decision Making** – We are now going to ask you about how you and your family make  
4 decisions. First, in general, and then specifically how you have made decisions  
5 regarding your child's treatment.  
6  
7

8 23. Who do you consider to be the person who makes most decisions in your house in  
9 general? These might be decisions about care of the children, where the family lives, or  
10 how money is spent, for example. *Choose one.*

- 11  I am the person most involved in making decisions.  
12  I share decision-making equally with my child's other parent or other family member.  
13  Another parent or family member makes most of the decisions in my house  
14  
15

16 24. Who do you consider to be the parent most involved in making decisions about your  
17 child's cancer treatment? *Choose one.*

- 18  I am the parent most involved in making decisions.  
19  I share decision-making equally with my child's other parent or other family member.  
20  Another parent or family member makes most of the decisions for my child's  
21 treatment.  
22  
23

24 25. Parents differ in the ways they prefer to make treatment decisions for their children.  
25 Which statement best describes the role you **would prefer** to play when decisions  
26 about treatment for your child's cancer are made? *Please check one.*

- 27  I prefer to make the decisions about treatment  
28  I prefer that my child's oncologist and I make the decisions together.  
29  I prefer that my child's oncologist make most of the decisions  
30  
31

32 26. Which statement best describes the role you **actually played** when making  
33 decisions about treatment for your child's cancer? *Please check one.*

- 34  I made the decisions about treatment  
35  My child's oncologist and I made the decisions together.  
36  My child's oncologist made the decisions  
37  
38

39 27. Some families have help making decisions from people in their community, which  
40 statement best describes the role your community played in helping you make  
41 decisions? *Choose one*

- 42  I/We made the decisions about treatment without input from my community  
43  I/We made the decisions with help from members or leaders in my community  
44  My community, or a leader in my community, made the decision and told me what  
45 was best  
46  
47

48 28. Some families have help making decisions from religious or spiritual leaders, which  
49 statement best describes the role your religious/spiritual leaders played in helping you  
50 make decisions? *Choose one.*

- 51  I/We made the decisions about treatment without input from religious or spiritual  
52 leaders  
53  I/We made the decisions with help from religious or spiritual leaders  
54  My spiritual or religious leaders made the decision and told me what was best  
55  
56  
57  
58  
59  
60

1  
2  
3  
4  
5  
6  
7  
8  
9  
10  
11  
12  
13  
14  
15  
16  
17  
18  
19  
20  
21  
22  
23  
24  
25  
26  
27  
28  
29  
30  
31  
32  
33  
34  
35  
36  
37  
38  
39  
40  
41  
42  
43  
44  
45  
46  
47  
48  
49  
50  
51  
52  
53  
54  
55  
56  
57  
58  
59  
60

29. At the time of diagnosis, which of the following statements best describes how your oncologist explained your child’s treatment plan. *Please check one*

- He/she gave me different options and I chose what was best
- He/she gave me different options, and he/she told me what was best
- He/she gave me only one option

For peer review only

1  
2  
3 30. Using the colored circles again, but this time we would like to know **how much you**  
4 **agree or disagree with the following statements**. Remember that on the left there  
5 are many green circles. These indicate something you completely agree with. In the  
6 middle, the few yellow circles, indicate something that you slightly agree with. And on  
7 the right, after the red line, there are no circles. This indicates something you disagree  
8 with.  
9

10  
11 Now I would like to know what you think about the decisions you have made related to  
12 your child's cancer.  
13

#### 14 **How much do you agree or disagree with...**

- 15 • I have made the right decisions
- 16
- 17 • I regret the choices that were made
- 18
- 19 • I would make the same choices if I had to do it all over again
- 20
- 21 • My choices did my child harm
- 22
- 23 • The decisions were wise
- 24
- 25
- 26
- 27
- 28
- 29
- 30
- 31
- 32
- 33
- 34
- 35
- 36
- 37
- 38
- 39
- 40
- 41
- 42
- 43
- 44
- 45
- 46
- 47
- 48
- 49
- 50
- 51
- 52
- 53
- 54
- 55
- 56
- 57
- 58
- 59
- 60

1  
2  
3 **Medical team** – Now we are going to ask you a little bit about the team taking care of  
4 you at UNOP, and your relationship with this team.  
5

6  
7 31. We will use the circles again, but this time we would like to know **how much you**  
8 **agree or disagree with the following statements**. As always, on the left there are  
9 many green circles. These indicate something you completely agree with. In the middle,  
10 the few yellow circles, indicate something that you slightly agree with. And on the right,  
11 after the red line, there are no circles. This indicates something you disagree with.  
12

13 **How much do you agree with each of the following statements about your child's**  
14 **doctors?**  
15

- 16
- 17 • I trust my child's doctors
- 18
- 19 • My child's doctors ask about how my family is coping with cancer
- 20
- 21 • My child's doctors care about my child's quality of life
- 22
- 23 • My child's doctors offer my family hope
- 24
- 25
- 26

27  
28 32. Using the colored circles, **how much do you agree with each of the following**  
29 **statements regarding doctors in general?**  
30

- 31 • Doctors are prying too much into personal matters when they ask a lot of  
32 questions about a patient's culture, or community. [IF THE RESPONDENT  
33 DOES NOT UNDERSTAND: *This statement means that you think the doctors*  
34 *are being nosy when they ask many questions about a patient's community*  
35 *or culture.*]  
36
- 37
- 38 • I'd rather have doctors and nurses make the decisions about what's best than  
39 for them to give me a whole lot of choices. [IF THE RESPONDENT DOES  
40 NOT UNDERSTAND: *This means that you prefer that the doctors decide*  
41 *without offering you choices.*]  
42
- 43
- 44 • It is best for parents if they do not have a full explanation of their child's  
45 medical condition  
46
- 47 • It is best for children if they do not have a full explanation of their medical  
48 condition  
49
- 50
- 51 • Parents should not try to find out about their conditions on their own, they  
52 should rely on their doctors' knowledge.  
53  
54  
55  
56  
57  
58  
59  
60



1  
2  
3 33. How comfortable do your doctors and other health professionals make you feel  
4 asking questions? *Choose one.*

- 5  Very comfortable  
6  Somewhat comfortable  
7  Not at all comfortable  
8  
9

10 34. How often do your doctors and other health professionals have open and honest  
11 communication with you? *Choose one.*

- 12  
13  Always  
14  Sometimes  
15  Never  
16  
17

18 35. How much do your doctors and other health professionals give you information and  
19 resources to help you make decisions about your child's care? *Choose one.*

- 20  A Great Deal  
21  Somewhat  
22  Not at all  
23  
24

25 36. How well do your doctors and other health professionals talk with you about how to  
26 cope with any fears, stress, and other feelings? *Choose one.*

- 27  Very Well  
28  Fairly Well  
29  Poorly  
30  
31

32 37. How often do your doctors and other health professionals make sure you  
33 understand the steps in your child's care? *Choose one.*

- 34  Always  
35  Sometimes  
36  Never  
37  
38

39 38. How well do your doctors and other health professionals help you deal with the  
40 things nobody really knows about cancer? *Choose one.* [IF THE RESPONDENT DOES  
41 NOT UNDERSTAND ASK: *How well do the doctors help you manage for example, that*  
42 *you don't know if your child will respond to treatment, or if the cancer is going to come*  
43 *back?]*

- 44  Very Well  
45  Fairly Well  
46  Poorly  
47  
48

49 39. How often do your doctors and other health professionals take into account your  
50 culture, background or religious beliefs when planning treatment for your child? *Choose*  
51 *one.*

- 52  Always  
53  Sometimes  
54  Never  
55  
56  
57  
58  
59  
60

1  
2  
3 40. When you ask questions, how often do you get answers that are understandable?

4 *Choose one.*

5  Always

6  Sometimes

7  Never

8  
9  
10 41. Overall, how satisfied are you with the communication with your doctors and other  
11 health professionals? *Choose one.*

12  Very satisfied

13  Fairly satisfied

14  Not at all satisfied

15  
16  
17  
18 42. Is there anything else you would like us to know about your experiences with  
19 communication about your child's cancer care or diagnosis?  
20  
21  
22  
23  
24  
25  
26  
27  
28  
29  
30  
31  
32  
33  
34  
35  
36  
37  
38  
39  
40  
41  
42  
43  
44  
45  
46  
47  
48  
49  
50  
51  
52  
53  
54  
55  
56  
57  
58  
59  
60

## 3. Codebook

| Topic                                           | Category                                                                                                                  | Code                                     | Definition                                                                                                                                                                                                                                                                                                             |                                                                                                                                     |
|-------------------------------------------------|---------------------------------------------------------------------------------------------------------------------------|------------------------------------------|------------------------------------------------------------------------------------------------------------------------------------------------------------------------------------------------------------------------------------------------------------------------------------------------------------------------|-------------------------------------------------------------------------------------------------------------------------------------|
| <b>Direction of conversation</b>                | <b>Clinician speaker</b>                                                                                                  | Oncologist to parent/family              | Clear that oncologist is speaking directly to the caregiver only.                                                                                                                                                                                                                                                      |                                                                                                                                     |
|                                                 |                                                                                                                           | Psychologist to parent/family            | Clear that psychologist is speaking directly to the caregiver only.                                                                                                                                                                                                                                                    |                                                                                                                                     |
| <b>Clinician patient-centered communication</b> | <b>Supportive talk:</b><br><i>Verbal behaviors that validate or support the patient's emotional or motivational state</i> | Verbal attentiveness                     | Showing understanding, paraphrasing, empathy, showing concern, worry, reassurance, optimism, legitimizing, respect, descriptions of inclusivity, validation. Include statements like "If you ever need anything come find me." "If you have more questions you can always ask" "It is my pleasure to help." "Cheer up" |                                                                                                                                     |
|                                                 |                                                                                                                           | <b>Multidisciplinary approach</b>        | Team care                                                                                                                                                                                                                                                                                                              | Descriptions of clinicians working as a team to care for family. Does NOT include all general statements of "we" from providers.    |
|                                                 |                                                                                                                           | <b>Direct communication</b>              | Honesty                                                                                                                                                                                                                                                                                                                | Explicit references to honest or direct communication (e.g. "It is important that we are honest with you")                          |
| <b>Decision making</b>                          | <b>Decision makers (who) Using for both cancer related and non-cancer related decision</b>                                | Parents as joint decision makers         | Descriptions of two caregivers making decisions together as explicitly stated by caregiver                                                                                                                                                                                                                             |                                                                                                                                     |
|                                                 |                                                                                                                           | Parent as single decision maker          | Descriptions of one caregiver making decisions alone as explicitly stated by caregiver                                                                                                                                                                                                                                 |                                                                                                                                     |
|                                                 |                                                                                                                           | Extended decision maker                  | Descriptions of decisions made that involve family beyond caregivers or community as explicitly stated by caregiver, includes God.                                                                                                                                                                                     |                                                                                                                                     |
|                                                 |                                                                                                                           | Child involved in decision making        | Descriptions of involving the child in decision making as explicitly stated by caregiver                                                                                                                                                                                                                               |                                                                                                                                     |
|                                                 |                                                                                                                           | Deference to provider                    | Explicit statements from caregivers that they prefer provider to make decision, or that they left decision up to provider, including statements that it is not their "role" to make such decisions                                                                                                                     |                                                                                                                                     |
|                                                 |                                                                                                                           | Team talk (parent)                       | References (made by caregivers) to decisions that were made together with medical team                                                                                                                                                                                                                                 |                                                                                                                                     |
|                                                 |                                                                                                                           | <b>Decision making (what) (INT only)</b> | Decisions unrelated to cancer                                                                                                                                                                                                                                                                                          | Descriptions of decision making (by family) that is not related to cancer or cancer treatment – only code in interview transcripts. |
|                                                 |                                                                                                                           |                                          | Cancer decisions                                                                                                                                                                                                                                                                                                       | Descriptions of decision making (by family) related to child's cancer care – only code in interview transcripts                     |
|                                                 | <b>Decision making (how)</b>                                                                                              | Team talk (provider): eliciting goals    | Provider elicits goals from caregiver to assist with decision making                                                                                                                                                                                                                                                   |                                                                                                                                     |
|                                                 |                                                                                                                           | Team talk (provider): offering choices   | Provider offers options or choices to caregiver                                                                                                                                                                                                                                                                        |                                                                                                                                     |

|  |                                                                         |                                                                                                                 |                                                                                                                                                                                                                                                                                                                                                                             |
|--|-------------------------------------------------------------------------|-----------------------------------------------------------------------------------------------------------------|-----------------------------------------------------------------------------------------------------------------------------------------------------------------------------------------------------------------------------------------------------------------------------------------------------------------------------------------------------------------------------|
|  |                                                                         | Team talk (provider): family as part of the team                                                                | Provider discusses caregiver as part of the team making medical decisions (e.g. “we all make the decision together,” “We need your authorization to treat,” “If you agree...”). Does NOT include verbally attentive references such as “don’t worry we will explain...” OR “we will explain X to you”                                                                       |
|  |                                                                         | Option talk: discussion of risks                                                                                | Provider discussion of comparative risks or side effects of presented options                                                                                                                                                                                                                                                                                               |
|  |                                                                         | No-Option talk: discussion of risks                                                                             | Provider discussion of risks or side effects of one therapy without suggesting alternative                                                                                                                                                                                                                                                                                  |
|  |                                                                         | Option talk: discussion of benefits                                                                             | Provider discussion of comparative benefits of presented options                                                                                                                                                                                                                                                                                                            |
|  |                                                                         | No-Option talk: discussion of benefits                                                                          | Provider discussion of benefits of one therapy without suggesting alternative                                                                                                                                                                                                                                                                                               |
|  |                                                                         | Option talk: discussion of evidence                                                                             | Provider discussion of evidence base for presented options                                                                                                                                                                                                                                                                                                                  |
|  |                                                                         | No-Option talk: discussion of evidence                                                                          | Provider discussion of evidence base one therapy without suggesting alternative including explaining to the family why we are treating. E.g. “if he responds, we will give him ___” “we will do this if the first round of chemo works.”                                                                                                                                    |
|  |                                                                         | Decision talk: preference-based                                                                                 | Provider elicits informed preferences and asks caregiver to decide between choices or suggests a decision based on preferences or goals expressed by caregiver.                                                                                                                                                                                                             |
|  |                                                                         | Decision talk: Health promotion                                                                                 | Framing or nudging towards decision among choices                                                                                                                                                                                                                                                                                                                           |
|  |                                                                         | No-decision talk: Consequences                                                                                  | Provider describing potential consequences of NOT agreeing to recommended treatment plan.                                                                                                                                                                                                                                                                                   |
|  |                                                                         | No-decision talk: Giving decision                                                                               | Provider describes decision without options and without involving caregiver. Do NOT include hypothetical treatment decisions.                                                                                                                                                                                                                                               |
|  | <b>Decision making (why) MAY USE IN ALL TRANSCRIPTS, PARENT SPEAKER</b> | Family Factors- other children, financial influences                                                            | References to decisions that were made or complicated based on finances. Do NOT code all references to finances, just when they affect decision making.<br><br>References to decisions that were made or complicated by other children.                                                                                                                                     |
|  |                                                                         | Child’s best interest- symptoms/medical facts, quality of life concern, doing what is right/being a good parent | References to decisions that were made based on medical facts or the symptoms/condition of the child.<br><br>References to decisions that were made based on quality of life concern (e.g. so they can go to school, or be home with friends).<br><br>Decisions made because it is “the right thing to do” for the child or because it is what “a good caregiver should do” |
|  |                                                                         | Lack of agency- lack of choice, perceived threat, limited information                                           | Decisions that were made because it felt like the only option.<br><br>Decisions that were made because of fear.                                                                                                                                                                                                                                                             |

1  
2  
3  
4  
5  
6  
7  
8  
9  
10  
11  
12  
13  
14  
15  
16  
17  
18  
19  
20  
21  
22  
23  
24  
25  
26  
27  
28  
29  
30  
31  
32  
33  
34  
35  
36  
37  
38  
39  
40  
41  
42  
43  
44  
45  
46  
47  
48  
49  
50  
51  
52  
53  
54  
55  
56  
57  
58  
59  
60

|  |  |  |                                                                     |
|--|--|--|---------------------------------------------------------------------|
|  |  |  | Descriptions of lack of information as a barrier to decision making |
|--|--|--|---------------------------------------------------------------------|

For peer review only

1  
2  
3  
4  
5  
6  
7  
8  
9  
10  
11  
12  
13  
14  
15  
16  
17  
18  
19  
20  
21  
22  
23  
24  
25  
26  
27  
28  
29  
30  
31  
32  
33  
34  
35  
36  
37  
38  
39  
40  
41  
42  
43  
44  
45  
46  
47  
48  
49  
50  
51  
52  
53  
54  
55  
56  
57  
58  
59  
60STROBE Statement—Checklist of items that should be included in reports of *cross-sectional studies*

|                              | Item No | Recommendation                                                                                                                                                                                    | Page number     |
|------------------------------|---------|---------------------------------------------------------------------------------------------------------------------------------------------------------------------------------------------------|-----------------|
| <b>Title and abstract</b>    | 1       | (a) Indicate the study's design with a commonly used term in the title or the abstract                                                                                                            | 1               |
|                              |         | (b) Provide in the abstract an informative and balanced summary of what was done and what was found                                                                                               | 4               |
| <b>Introduction</b>          |         |                                                                                                                                                                                                   |                 |
| Background/rationale         | 2       | Explain the scientific background and rationale for the investigation being reported                                                                                                              | 6               |
| Objectives                   | 3       | State specific objectives, including any prespecified hypotheses                                                                                                                                  | 6-7             |
| <b>Methods</b>               |         |                                                                                                                                                                                                   |                 |
| Study design                 | 4       | Present key elements of study design early in the paper                                                                                                                                           | 7               |
| Setting                      | 5       | Describe the setting, locations, and relevant dates, including periods of recruitment, exposure, follow-up, and data collection                                                                   | 7-8             |
| Participants                 | 6       | (a) Give the eligibility criteria, and the sources and methods of selection of participants                                                                                                       | 7-8             |
| Variables                    | 7       | Clearly define all outcomes, exposures, predictors, potential confounders, and effect modifiers. Give diagnostic criteria, if applicable                                                          | 8-10            |
| Data sources/<br>measurement | 8*      | For each variable of interest, give sources of data and details of methods of assessment (measurement). Describe comparability of assessment methods if there is more than one group              | 8-10            |
| Bias                         | 9       | Describe any efforts to address potential sources of bias                                                                                                                                         | 12              |
| Study size                   | 10      | Explain how the study size was arrived at                                                                                                                                                         | 7-8             |
| Quantitative variables       | 11      | Explain how quantitative variables were handled in the analyses. If applicable, describe which groupings were chosen and why                                                                      | 11              |
| Statistical methods          | 12      | (a) Describe all statistical methods, including those used to control for confounding                                                                                                             | 11              |
|                              |         | (b) Describe any methods used to examine subgroups and interactions                                                                                                                               | 11              |
|                              |         | (c) Explain how missing data were addressed                                                                                                                                                       | 11              |
|                              |         | (d) If applicable, describe analytical methods taking account of sampling strategy                                                                                                                | N/A             |
|                              |         | (e) Describe any sensitivity analyses                                                                                                                                                             | N/A             |
| <b>Results</b>               |         |                                                                                                                                                                                                   |                 |
| Participants                 | 13*     | (a) Report numbers of individuals at each stage of study—eg numbers potentially eligible, examined for eligibility, confirmed eligible, included in the study, completing follow-up, and analysed | 13              |
|                              |         | (b) Give reasons for non-participation at each stage                                                                                                                                              | 7-8             |
|                              |         | (c) Consider use of a flow diagram                                                                                                                                                                | N/A             |
| Descriptive data             | 14*     | (a) Give characteristics of study participants (eg demographic, clinical, social) and information on exposures and potential confounders                                                          | 24-25           |
|                              |         | (b) Indicate number of participants with missing data for each variable of interest                                                                                                               | 24              |
| Outcome data                 | 15*     | Report numbers of outcome events or summary measures                                                                                                                                              | 13-16;<br>28-29 |
| Main results                 | 16      | (a) Give unadjusted estimates and, if applicable, confounder-adjusted                                                                                                                             | 13-16;          |

|                          |    |                                                                                                                                                                            |       |
|--------------------------|----|----------------------------------------------------------------------------------------------------------------------------------------------------------------------------|-------|
|                          |    | estimates and their precision (eg, 95% confidence interval). Make clear which confounders were adjusted for and why they were included                                     | 28-29 |
|                          |    | (b) Report category boundaries when continuous variables were categorized                                                                                                  | 27-29 |
|                          |    | (c) If relevant, consider translating estimates of relative risk into absolute risk for a meaningful time period                                                           | N/A   |
| Other analyses           | 17 | Report other analyses done—eg analyses of subgroups and interactions, and sensitivity analyses                                                                             | 13-16 |
| <b>Discussion</b>        |    |                                                                                                                                                                            |       |
| Key results              | 18 | Summarise key results with reference to study objectives                                                                                                                   | 16-17 |
| Limitations              | 19 | Discuss limitations of the study, taking into account sources of potential bias or imprecision. Discuss both direction and magnitude of any potential bias                 | 19    |
| Interpretation           | 20 | Give a cautious overall interpretation of results considering objectives, limitations, multiplicity of analyses, results from similar studies, and other relevant evidence | 20    |
| Generalisability         | 21 | Discuss the generalisability (external validity) of the study results                                                                                                      | 20    |
| <b>Other information</b> |    |                                                                                                                                                                            |       |
| Funding                  | 22 | Give the source of funding and the role of the funders for the present study and, if applicable, for the original study on which the present article is based              | 1     |

\*Give information separately for exposed and unexposed groups.

**Note:** An Explanation and Elaboration article discusses each checklist item and gives methodological background and published examples of transparent reporting. The STROBE checklist is best used in conjunction with this article (freely available on the Web sites of PLoS Medicine at <http://www.plosmedicine.org/>, Annals of Internal Medicine at <http://www.annals.org/>, and Epidemiology at <http://www.epidem.com/>). Information on the STROBE Initiative is available at [www.strobe-statement.org](http://www.strobe-statement.org).
